# Supplementary material for: Nanopores of a Covalent Organic Framework: A Customizable Vessel for Organocatalysis
Source: PubMed Central journal article supplement — ACS Omega. 2022 Apr 26;7(18):15275–95. doi: 10.1021/acsomega.2c00235 (PMC9096826; doi:10.1021/acsomega.2c00235), 2022-04-26
Supplement: ao2c00235_si_001.pdf [file ao2c00235_si_001.pdf]

*Supporting information for*

# Nanopores of Covalent Organic Framework- A Customizable Vessel for Organocatalysis

*Debanjan Chakraborty,<sup>ab</sup> Dinesh Mullangi,<sup>a</sup> Chandana Chandran,<sup>a</sup> and Ramanathan Vaidhyanathan<sup>ab\*</sup>*

<sup>a</sup>Department of Chemistry, Indian Institute of Science Education and Research, Pune 411008, India.

<sup>b</sup>Centre for Energy Science, Indian Institute of Science Education and Research, Pune 411008, India.

## **Table of Content:**

|                                                                                      |          |
|--------------------------------------------------------------------------------------|----------|
| Table S1: Selected organic transformation catalyzed by metal-free COF.....           | S2-S10.  |
| Table S2: Non-noble metal-based COF catalysts.....                                   | S11-S18. |
| Table S3: Noble-metal@COF as heterogeneous catalyst for organic transformations..... | S19-S32. |
| References.....                                                                      | S32-S35. |

**Table S1: Selected organic transformation catalyzed by metal-free COF.**

| No.                                                                                                                                                                                                                                                                                                                                                                                                                                                                                                                                   | Structure and Code of the COF and Notable properties                                                               | Catalysed Organic Reaction                                                                                                                                                                                                                                                                                                                                                                                                                                                                                                                                                                                                                                                                                                                                                                                                                                                                                                                                                                                                                                                                                                              | Ref.                |                |   |                     |                |          |                                      |    |          |          |                                      |    |          |          |                                                                        |    |   |          |                                                                        |    |   |          |                                        |     |   |          |                                        |    |    |  |          |   |    |  |  |          |   |  |  |          |   |    |
|---------------------------------------------------------------------------------------------------------------------------------------------------------------------------------------------------------------------------------------------------------------------------------------------------------------------------------------------------------------------------------------------------------------------------------------------------------------------------------------------------------------------------------------|--------------------------------------------------------------------------------------------------------------------|-----------------------------------------------------------------------------------------------------------------------------------------------------------------------------------------------------------------------------------------------------------------------------------------------------------------------------------------------------------------------------------------------------------------------------------------------------------------------------------------------------------------------------------------------------------------------------------------------------------------------------------------------------------------------------------------------------------------------------------------------------------------------------------------------------------------------------------------------------------------------------------------------------------------------------------------------------------------------------------------------------------------------------------------------------------------------------------------------------------------------------------------|---------------------|----------------|---|---------------------|----------------|----------|--------------------------------------|----|----------|----------|--------------------------------------|----|----------|----------|------------------------------------------------------------------------|----|---|----------|------------------------------------------------------------------------|----|---|----------|----------------------------------------|-----|---|----------|----------------------------------------|----|----|--|----------|---|----|--|--|----------|---|--|--|----------|---|----|
| <b>Knoevenagel reaction</b>                                                                                                                                                                                                                                                                                                                                                                                                                                                                                                           |                                                                                                                    |                                                                                                                                                                                                                                                                                                                                                                                                                                                                                                                                                                                                                                                                                                                                                                                                                                                                                                                                                                                                                                                                                                                                         |                     |                |   |                     |                |          |                                      |    |          |          |                                      |    |          |          |                                                                        |    |   |          |                                                                        |    |   |          |                                        |     |   |          |                                        |    |    |  |          |   |    |  |  |          |   |  |  |          |   |    |
| 1                                                                                                                                                                                                                                                                                                                                                                                                                                                                                                                                     |                                                                                                                    | <p>Size selective Knoevenagel condensation reaction. When R is H, the reaction yields &gt;90 product. But if R= Me, Ph, Tol etc, the reaction doesn't proceed.</p> <table border="1"> <thead> <tr> <th>Reaction</th> <th>A</th> <th>B</th> <th>Catalyst</th> <th>Conversion (%)</th> </tr> </thead> <tbody> <tr> <td rowspan="2">I</td> <td></td> <td></td> <td>BF-COF-1</td> <td>96</td> </tr> <tr> <td></td> <td></td> <td>BF-COF-2</td> <td>98</td> </tr> <tr> <td rowspan="2">II</td> <td></td> <td></td> <td>BF-COF-1</td> <td>4</td> </tr> <tr> <td></td> <td></td> <td>BF-COF-2</td> <td>3</td> </tr> <tr> <td rowspan="2">III</td> <td></td> <td></td> <td>BF-COF-1</td> <td>3</td> </tr> <tr> <td></td> <td></td> <td>BF-COF-2</td> <td>4</td> </tr> <tr> <td rowspan="2">IV</td> <td></td> <td></td> <td>BF-COF-1</td> <td>2</td> </tr> <tr> <td></td> <td></td> <td>BF-COF-2</td> <td>2</td> </tr> </tbody> </table>                                                                                                                                                                                                         | Reaction            | A              | B | Catalyst            | Conversion (%) | I        |                                      |    | BF-COF-1 | 96       |                                      |    | BF-COF-2 | 98       | II                                                                     |    |   | BF-COF-1 | 4                                                                      |    |   | BF-COF-2 | 3                                      | III |   |          | BF-COF-1                               | 3  |    |  | BF-COF-2 | 4 | IV |  |  | BF-COF-1 | 2 |  |  | BF-COF-2 | 2 | S1 |
| Reaction                                                                                                                                                                                                                                                                                                                                                                                                                                                                                                                              | A                                                                                                                  | B                                                                                                                                                                                                                                                                                                                                                                                                                                                                                                                                                                                                                                                                                                                                                                                                                                                                                                                                                                                                                                                                                                                                       | Catalyst            | Conversion (%) |   |                     |                |          |                                      |    |          |          |                                      |    |          |          |                                                                        |    |   |          |                                                                        |    |   |          |                                        |     |   |          |                                        |    |    |  |          |   |    |  |  |          |   |  |  |          |   |    |
| I                                                                                                                                                                                                                                                                                                                                                                                                                                                                                                                                     |                                                                                                                    |                                                                                                                                                                                                                                                                                                                                                                                                                                                                                                                                                                                                                                                                                                                                                                                                                                                                                                                                                                                                                                                                                                                                         | BF-COF-1            | 96             |   |                     |                |          |                                      |    |          |          |                                      |    |          |          |                                                                        |    |   |          |                                                                        |    |   |          |                                        |     |   |          |                                        |    |    |  |          |   |    |  |  |          |   |  |  |          |   |    |
|                                                                                                                                                                                                                                                                                                                                                                                                                                                                                                                                       |                                                                                                                    |                                                                                                                                                                                                                                                                                                                                                                                                                                                                                                                                                                                                                                                                                                                                                                                                                                                                                                                                                                                                                                                                                                                                         | BF-COF-2            | 98             |   |                     |                |          |                                      |    |          |          |                                      |    |          |          |                                                                        |    |   |          |                                                                        |    |   |          |                                        |     |   |          |                                        |    |    |  |          |   |    |  |  |          |   |  |  |          |   |    |
| II                                                                                                                                                                                                                                                                                                                                                                                                                                                                                                                                    |                                                                                                                    |                                                                                                                                                                                                                                                                                                                                                                                                                                                                                                                                                                                                                                                                                                                                                                                                                                                                                                                                                                                                                                                                                                                                         | BF-COF-1            | 4              |   |                     |                |          |                                      |    |          |          |                                      |    |          |          |                                                                        |    |   |          |                                                                        |    |   |          |                                        |     |   |          |                                        |    |    |  |          |   |    |  |  |          |   |  |  |          |   |    |
|                                                                                                                                                                                                                                                                                                                                                                                                                                                                                                                                       |                                                                                                                    |                                                                                                                                                                                                                                                                                                                                                                                                                                                                                                                                                                                                                                                                                                                                                                                                                                                                                                                                                                                                                                                                                                                                         | BF-COF-2            | 3              |   |                     |                |          |                                      |    |          |          |                                      |    |          |          |                                                                        |    |   |          |                                                                        |    |   |          |                                        |     |   |          |                                        |    |    |  |          |   |    |  |  |          |   |  |  |          |   |    |
| III                                                                                                                                                                                                                                                                                                                                                                                                                                                                                                                                   |                                                                                                                    |                                                                                                                                                                                                                                                                                                                                                                                                                                                                                                                                                                                                                                                                                                                                                                                                                                                                                                                                                                                                                                                                                                                                         | BF-COF-1            | 3              |   |                     |                |          |                                      |    |          |          |                                      |    |          |          |                                                                        |    |   |          |                                                                        |    |   |          |                                        |     |   |          |                                        |    |    |  |          |   |    |  |  |          |   |  |  |          |   |    |
|                                                                                                                                                                                                                                                                                                                                                                                                                                                                                                                                       |                                                                                                                    |                                                                                                                                                                                                                                                                                                                                                                                                                                                                                                                                                                                                                                                                                                                                                                                                                                                                                                                                                                                                                                                                                                                                         | BF-COF-2            | 4              |   |                     |                |          |                                      |    |          |          |                                      |    |          |          |                                                                        |    |   |          |                                                                        |    |   |          |                                        |     |   |          |                                        |    |    |  |          |   |    |  |  |          |   |  |  |          |   |    |
| IV                                                                                                                                                                                                                                                                                                                                                                                                                                                                                                                                    |                                                                                                                    |                                                                                                                                                                                                                                                                                                                                                                                                                                                                                                                                                                                                                                                                                                                                                                                                                                                                                                                                                                                                                                                                                                                                         | BF-COF-1            | 2              |   |                     |                |          |                                      |    |          |          |                                      |    |          |          |                                                                        |    |   |          |                                                                        |    |   |          |                                        |     |   |          |                                        |    |    |  |          |   |    |  |  |          |   |  |  |          |   |    |
|                                                                                                                                                                                                                                                                                                                                                                                                                                                                                                                                       |                                                                                                                    |                                                                                                                                                                                                                                                                                                                                                                                                                                                                                                                                                                                                                                                                                                                                                                                                                                                                                                                                                                                                                                                                                                                                         | BF-COF-2            | 2              |   |                     |                |          |                                      |    |          |          |                                      |    |          |          |                                                                        |    |   |          |                                                                        |    |   |          |                                        |     |   |          |                                        |    |    |  |          |   |    |  |  |          |   |  |  |          |   |    |
| <p>BET Surface area for: BF-COF-1 = <b>730 m<sup>2</sup>/g</b>, BF-COF-2 = <b>680 m<sup>2</sup>/g</b>. Pore size from NLDFT fit: <b>8.3 Å</b> for BF-COF-1 and <b>8.1 Å</b> for BF-COF-2. Reprinted with the permission from the Wiley Online Library (reference S1).</p>                                                                                                                                                                                                                                                             |                                                                                                                    |                                                                                                                                                                                                                                                                                                                                                                                                                                                                                                                                                                                                                                                                                                                                                                                                                                                                                                                                                                                                                                                                                                                                         |                     |                |   |                     |                |          |                                      |    |          |          |                                      |    |          |          |                                                                        |    |   |          |                                                                        |    |   |          |                                        |     |   |          |                                        |    |    |  |          |   |    |  |  |          |   |  |  |          |   |    |
| 2                                                                                                                                                                                                                                                                                                                                                                                                                                                                                                                                     | <p>The 3- and 4-connected building units results in a 3D network with the cubic carbon nitride (ctn) topology.</p> | <p><b>One-Pot Cascade Reactions.</b></p> <p>Step 1: Requires acidic sites, which are supplied by boroxine group<br/> Step 2: Condensation step involves the basic sites from imine bonds in DL-COFs.</p> <table border="1"> <thead> <tr> <th>Entry</th> <th>Catalyst</th> <th>C</th> <th>Conversion of D (%)</th> </tr> </thead> <tbody> <tr> <td>1</td> <td>DL-COF-1</td> <td>R<sub>1</sub> = R<sub>2</sub> = CN</td> <td>98</td> </tr> <tr> <td>2</td> <td>DL-COF-2</td> <td>R<sub>1</sub> = R<sub>2</sub> = CN</td> <td>96</td> </tr> <tr> <td>3</td> <td>DL-COF-1</td> <td>R<sub>1</sub> = CN, R<sub>2</sub> = COOC<sub>2</sub>H<sub>5</sub></td> <td>93</td> </tr> <tr> <td>4</td> <td>DL-COF-2</td> <td>R<sub>1</sub> = CN, R<sub>2</sub> = COOC<sub>2</sub>H<sub>5</sub></td> <td>92</td> </tr> <tr> <td>5</td> <td>DL-COF-1</td> <td>R<sub>1</sub> = R<sub>2</sub> = COCH</td> <td>93</td> </tr> <tr> <td>6</td> <td>DL-COF-2</td> <td>R<sub>1</sub> = R<sub>2</sub> = COCH</td> <td>94</td> </tr> </tbody> </table> <p>R<sub>1</sub>: CN, COCH. R<sub>2</sub>: CN, COCH, COOC<sub>2</sub>H<sub>5</sub><br/> Yield: 92-98%.</p> | Entry               | Catalyst       | C | Conversion of D (%) | 1              | DL-COF-1 | R <sub>1</sub> = R <sub>2</sub> = CN | 98 | 2        | DL-COF-2 | R <sub>1</sub> = R <sub>2</sub> = CN | 96 | 3        | DL-COF-1 | R <sub>1</sub> = CN, R <sub>2</sub> = COOC <sub>2</sub> H <sub>5</sub> | 93 | 4 | DL-COF-2 | R <sub>1</sub> = CN, R <sub>2</sub> = COOC <sub>2</sub> H <sub>5</sub> | 92 | 5 | DL-COF-1 | R <sub>1</sub> = R <sub>2</sub> = COCH | 93  | 6 | DL-COF-2 | R <sub>1</sub> = R <sub>2</sub> = COCH | 94 | S2 |  |          |   |    |  |  |          |   |  |  |          |   |    |
| Entry                                                                                                                                                                                                                                                                                                                                                                                                                                                                                                                                 | Catalyst                                                                                                           | C                                                                                                                                                                                                                                                                                                                                                                                                                                                                                                                                                                                                                                                                                                                                                                                                                                                                                                                                                                                                                                                                                                                                       | Conversion of D (%) |                |   |                     |                |          |                                      |    |          |          |                                      |    |          |          |                                                                        |    |   |          |                                                                        |    |   |          |                                        |     |   |          |                                        |    |    |  |          |   |    |  |  |          |   |  |  |          |   |    |
| 1                                                                                                                                                                                                                                                                                                                                                                                                                                                                                                                                     | DL-COF-1                                                                                                           | R <sub>1</sub> = R <sub>2</sub> = CN                                                                                                                                                                                                                                                                                                                                                                                                                                                                                                                                                                                                                                                                                                                                                                                                                                                                                                                                                                                                                                                                                                    | 98                  |                |   |                     |                |          |                                      |    |          |          |                                      |    |          |          |                                                                        |    |   |          |                                                                        |    |   |          |                                        |     |   |          |                                        |    |    |  |          |   |    |  |  |          |   |  |  |          |   |    |
| 2                                                                                                                                                                                                                                                                                                                                                                                                                                                                                                                                     | DL-COF-2                                                                                                           | R <sub>1</sub> = R <sub>2</sub> = CN                                                                                                                                                                                                                                                                                                                                                                                                                                                                                                                                                                                                                                                                                                                                                                                                                                                                                                                                                                                                                                                                                                    | 96                  |                |   |                     |                |          |                                      |    |          |          |                                      |    |          |          |                                                                        |    |   |          |                                                                        |    |   |          |                                        |     |   |          |                                        |    |    |  |          |   |    |  |  |          |   |  |  |          |   |    |
| 3                                                                                                                                                                                                                                                                                                                                                                                                                                                                                                                                     | DL-COF-1                                                                                                           | R <sub>1</sub> = CN, R <sub>2</sub> = COOC <sub>2</sub> H <sub>5</sub>                                                                                                                                                                                                                                                                                                                                                                                                                                                                                                                                                                                                                                                                                                                                                                                                                                                                                                                                                                                                                                                                  | 93                  |                |   |                     |                |          |                                      |    |          |          |                                      |    |          |          |                                                                        |    |   |          |                                                                        |    |   |          |                                        |     |   |          |                                        |    |    |  |          |   |    |  |  |          |   |  |  |          |   |    |
| 4                                                                                                                                                                                                                                                                                                                                                                                                                                                                                                                                     | DL-COF-2                                                                                                           | R <sub>1</sub> = CN, R <sub>2</sub> = COOC <sub>2</sub> H <sub>5</sub>                                                                                                                                                                                                                                                                                                                                                                                                                                                                                                                                                                                                                                                                                                                                                                                                                                                                                                                                                                                                                                                                  | 92                  |                |   |                     |                |          |                                      |    |          |          |                                      |    |          |          |                                                                        |    |   |          |                                                                        |    |   |          |                                        |     |   |          |                                        |    |    |  |          |   |    |  |  |          |   |  |  |          |   |    |
| 5                                                                                                                                                                                                                                                                                                                                                                                                                                                                                                                                     | DL-COF-1                                                                                                           | R <sub>1</sub> = R <sub>2</sub> = COCH                                                                                                                                                                                                                                                                                                                                                                                                                                                                                                                                                                                                                                                                                                                                                                                                                                                                                                                                                                                                                                                                                                  | 93                  |                |   |                     |                |          |                                      |    |          |          |                                      |    |          |          |                                                                        |    |   |          |                                                                        |    |   |          |                                        |     |   |          |                                        |    |    |  |          |   |    |  |  |          |   |  |  |          |   |    |
| 6                                                                                                                                                                                                                                                                                                                                                                                                                                                                                                                                     | DL-COF-2                                                                                                           | R <sub>1</sub> = R <sub>2</sub> = COCH                                                                                                                                                                                                                                                                                                                                                                                                                                                                                                                                                                                                                                                                                                                                                                                                                                                                                                                                                                                                                                                                                                  | 94                  |                |   |                     |                |          |                                      |    |          |          |                                      |    |          |          |                                                                        |    |   |          |                                                                        |    |   |          |                                        |     |   |          |                                        |    |    |  |          |   |    |  |  |          |   |  |  |          |   |    |
| <p>BET surface areas of DL-COF-1 and DL-COF-2 are <b>2259</b> and <b>2071 m<sup>2</sup>/g</b>. NLDFT pore sizes of DL-COF-1 and DL-COF-2 are <b>13.6</b> and <b>12.8 Å</b>. H<sub>2</sub> uptake at 77K at 1 bar: 234 and 193 cc/g for DL-COF-1 and DL-COF-2. CO<sub>2</sub> uptake at 273K at 1 bar: 136 and 111 cc/g for DL-COF-1 and DL-COF-2. CH<sub>4</sub> uptake at 273K at 1 bar: 36 and 30 cc/g for DL-COF-1 and DL-COF-2 respectively. Reprinted with the permission from the American Chemical Society (reference S2).</p> |                                                                                                                    |                                                                                                                                                                                                                                                                                                                                                                                                                                                                                                                                                                                                                                                                                                                                                                                                                                                                                                                                                                                                                                                                                                                                         |                     |                |   |                     |                |          |                                      |    |          |          |                                      |    |          |          |                                                                        |    |   |          |                                                                        |    |   |          |                                        |     |   |          |                                        |    |    |  |          |   |    |  |  |          |   |  |  |          |   |    |
| 3                                                                                                                                                                                                                                                                                                                                                                                                                                                                                                                                     |                                                                                                                    | <p>R = H (1a), 3-CH<sub>3</sub> (1b), 4-CH<sub>3</sub> (1c), NO<sub>2</sub> (1d), OCH<sub>3</sub> (1e).</p>                                                                                                                                                                                                                                                                                                                                                                                                                                                                                                                                                                                                                                                                                                                                                                                                                                                                                                                                                                                                                             | S3                  |                |   |                     |                |          |                                      |    |          |          |                                      |    |          |          |                                                                        |    |   |          |                                                                        |    |   |          |                                        |     |   |          |                                        |    |    |  |          |   |    |  |  |          |   |  |  |          |   |    |

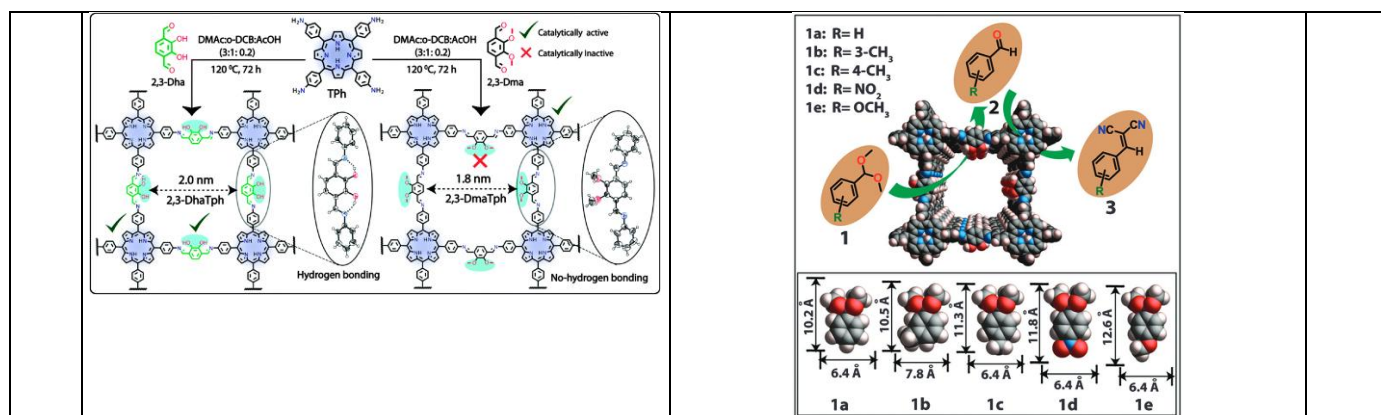

BET Surface areas of 2,3-DhaTph and 2,3-DmaTph are **1019** and **668 m<sup>2</sup>/g**. NLDFT pore sizes are **2.2** and **1.4 nm**, respectively. Due to the presence of acidic (catechol) and basic (porphyrin) sites, 2,3-DhaTph shows significant selectivity, reusability, and excellent ability to perform the cascade reaction. Reprinted with the permission from the Royal Society of Chemistry (reference S3).

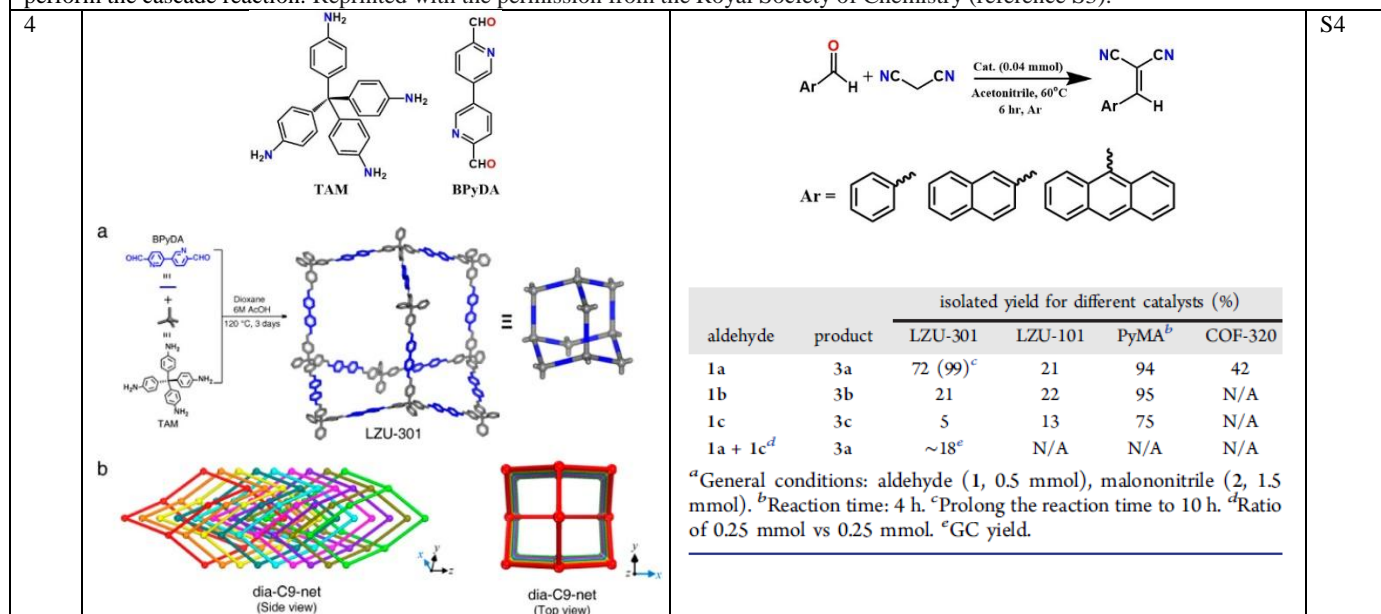

S4

**Notable properties:** BET SA of LZU-301 is **654 m<sup>2</sup>/g**; pore size: **5.8 × 10.4 Å<sup>2</sup>** (contracted form) to **9.6 × 10.4 Å<sup>2</sup>** (expanded form). Significant stepwise and hysteresis uptake is observed from THF adsorption isotherm at 283 K indicating LZU-301 retains its contracted phase for dynamic response at higher temperatures. Dynamic behaviour is studied by <sup>129</sup>Xe NMR spectroscopy. CO<sub>2</sub> uptakes are **2.63** and **1.59 mmol/g** at 273 and 298K respectively at 1 bar. Dynamic CO<sub>2</sub>/N<sub>2</sub> separation at dry condition, 298K, 1 bar: CO<sub>2</sub> uptake is **0.22 mmol/g**. Uptake is **0.29 mmol/g** under **17% RH** and **0.37 mmol/g** under **83% RH** indicating water-assisted gate opening. Reprinted with the permission from the American Chemical Society (reference S4).

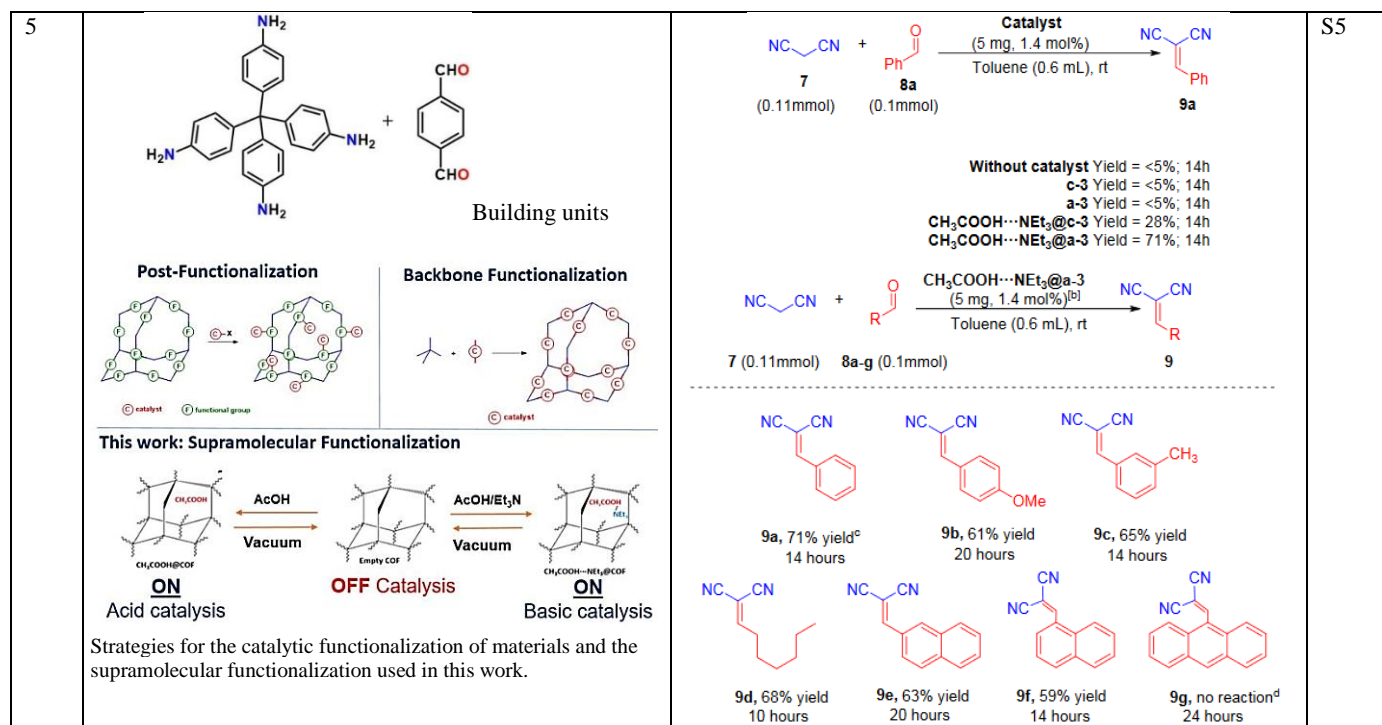

COF-300 is modified with the acid (CH<sub>3</sub>COOH) and base (NEt<sub>3</sub>) to impose catalytic activity of ring-opening reaction of epoxides and the Knoevenagel reaction. The catalytic activity is modulated by confinement effect of the nano porous materials (supported by DFT studies) and this results in the size dependent catalytic activity. Energetics of the catalysis has been modeled. Reprinted with the permission from the Royal Society of Chemistry (reference S5).

### CO<sub>2</sub> utilization

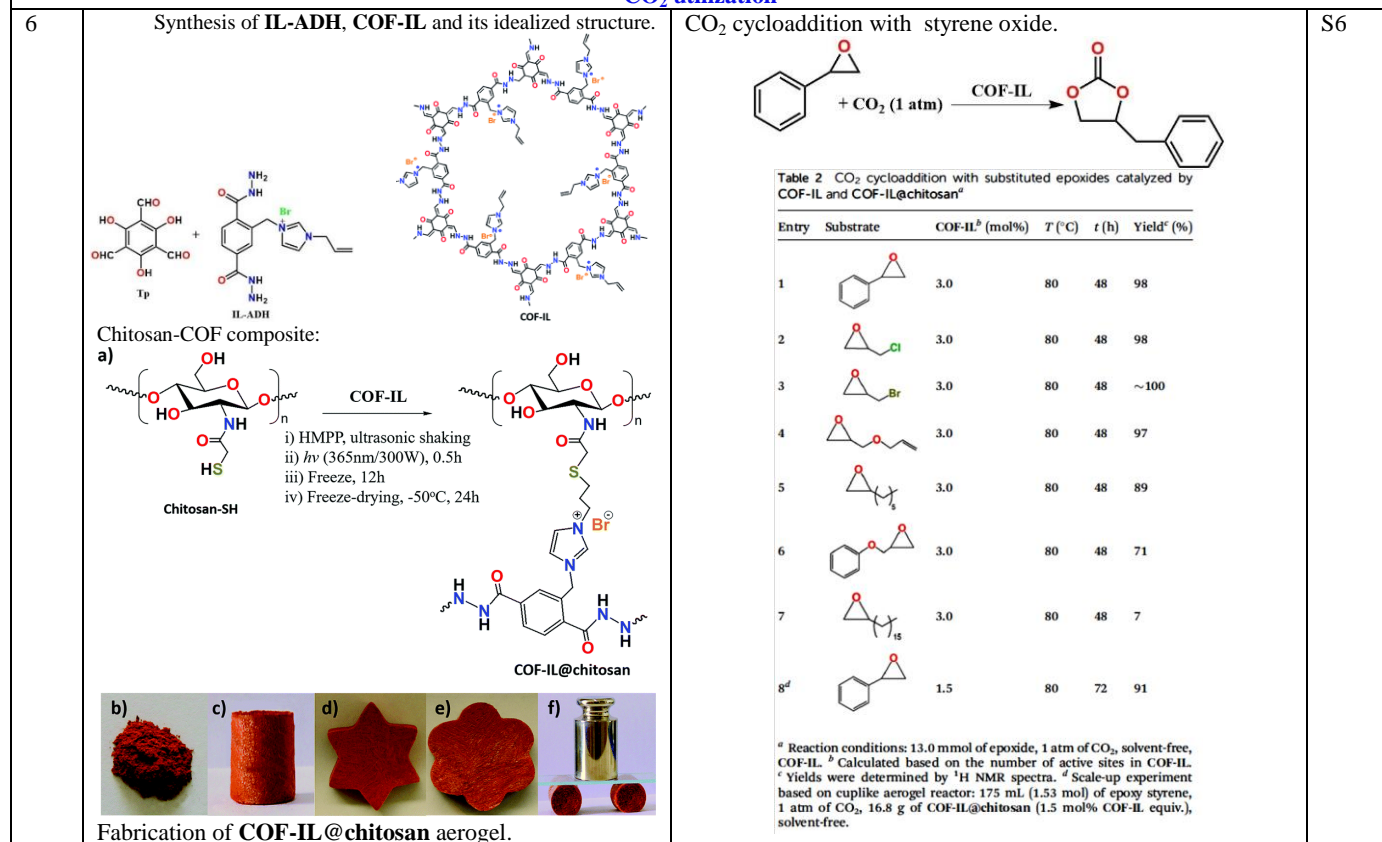

**Ionic liquid decorated COF (COF-IL):** BET SA: **291 m<sup>2</sup>/g** and pore sizes are **16.5** and **22.2 Å**. CO<sub>2</sub> uptake: 106.04 cc/g@273K and 59.37k cc/g@298K at 1 bar. Zero loading HOA: 28.8 kJ/mol. CO<sub>2</sub>/N<sub>2</sub> selectivity: 43.38@273K and **59.96@298K**. CO<sub>2</sub>/CH<sub>4</sub> selectivity: 15.95@273K and 13.85@298K. CO<sub>2</sub>/H<sub>2</sub> selectivity: 235.37@273K and **216.98@298K**.  
**COF-IL@ chitosan:** BET SA is **103.3 m<sup>2</sup>/g**. CO<sub>2</sub> uptakes for the composite: 38.77 cc/g@273K and 25.83 cc/g@298K. Zero loading HOA is 16.3 kJ/mol. CO<sub>2</sub>/N<sub>2</sub> selectivity: **93.65@273K** and 98.82@298K. Reprinted with the permission from the royal Society of Chemistry (reference S6).

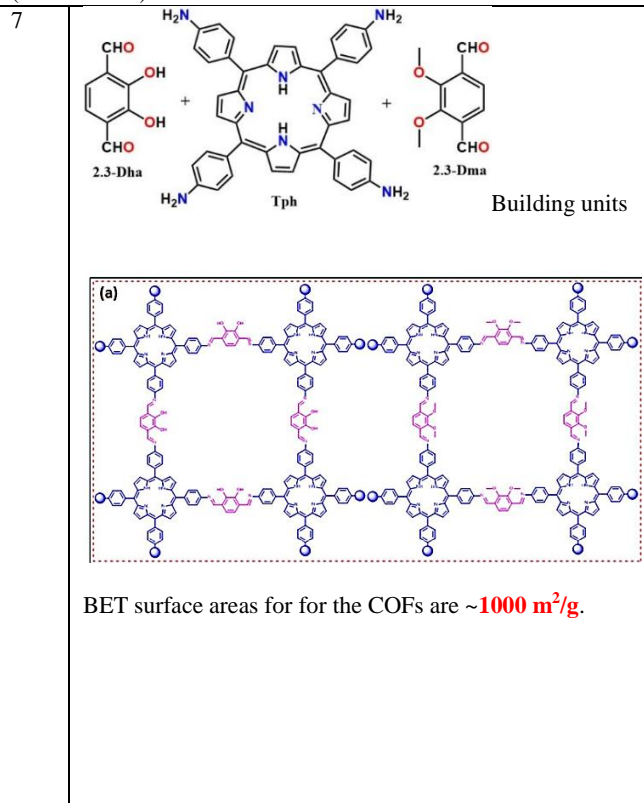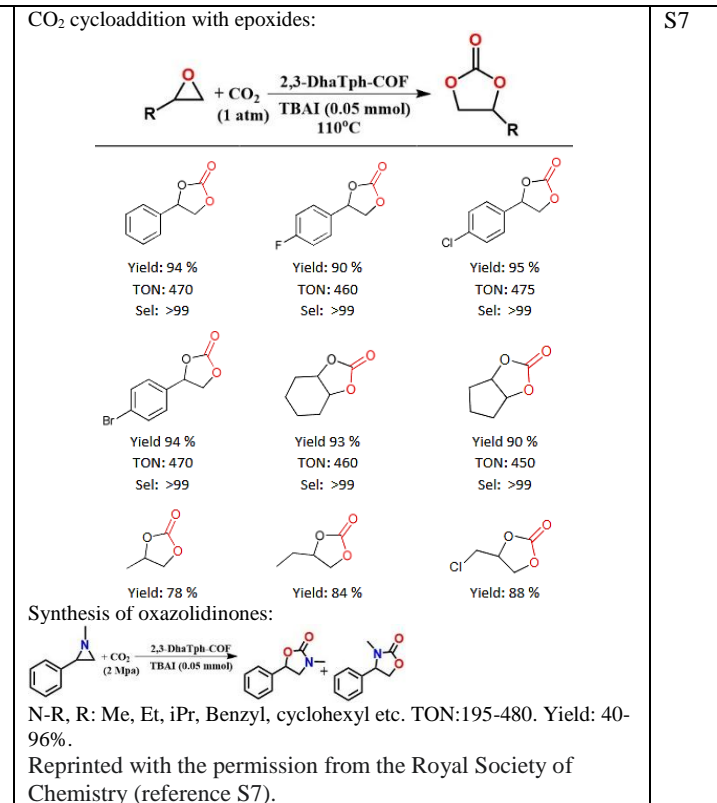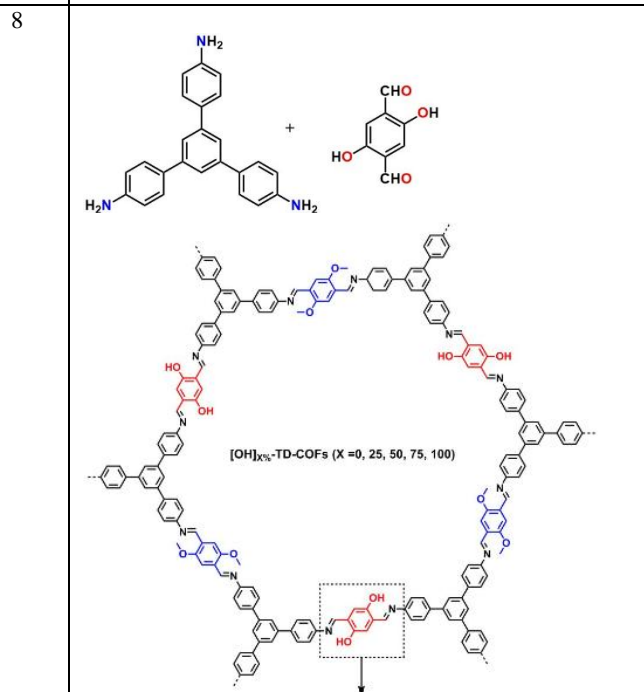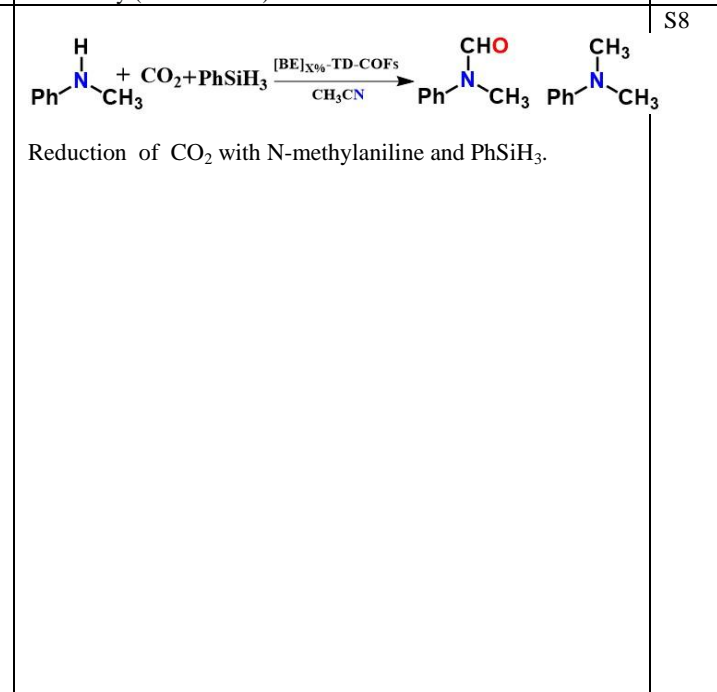



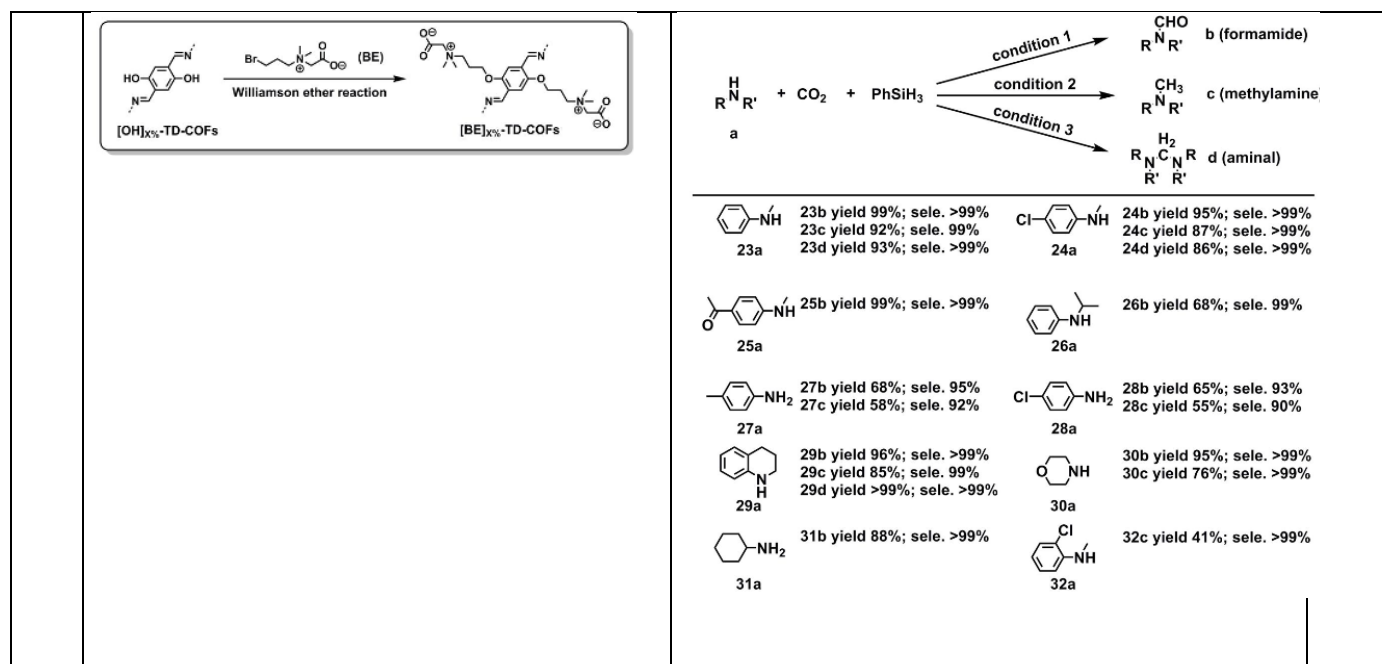

Zwitterionic COF, [BE]<sub>x%</sub>-TD-COFs: Betaine groups (BE) are introduced onto the channel walls of presynthesized frameworks via pore surface engineering methodology. BET SA and pore sizes vary with OH and BE's % loading. [OH] 0% to 100: **2280-1680 m<sup>2</sup>/g (3.24 nm)**. [BE] 0% to 75%: **2020-470 m<sup>2</sup>/g (3.17-2.95 nm)**. Reprinted with the permission from the American Chemical Society (reference S8).

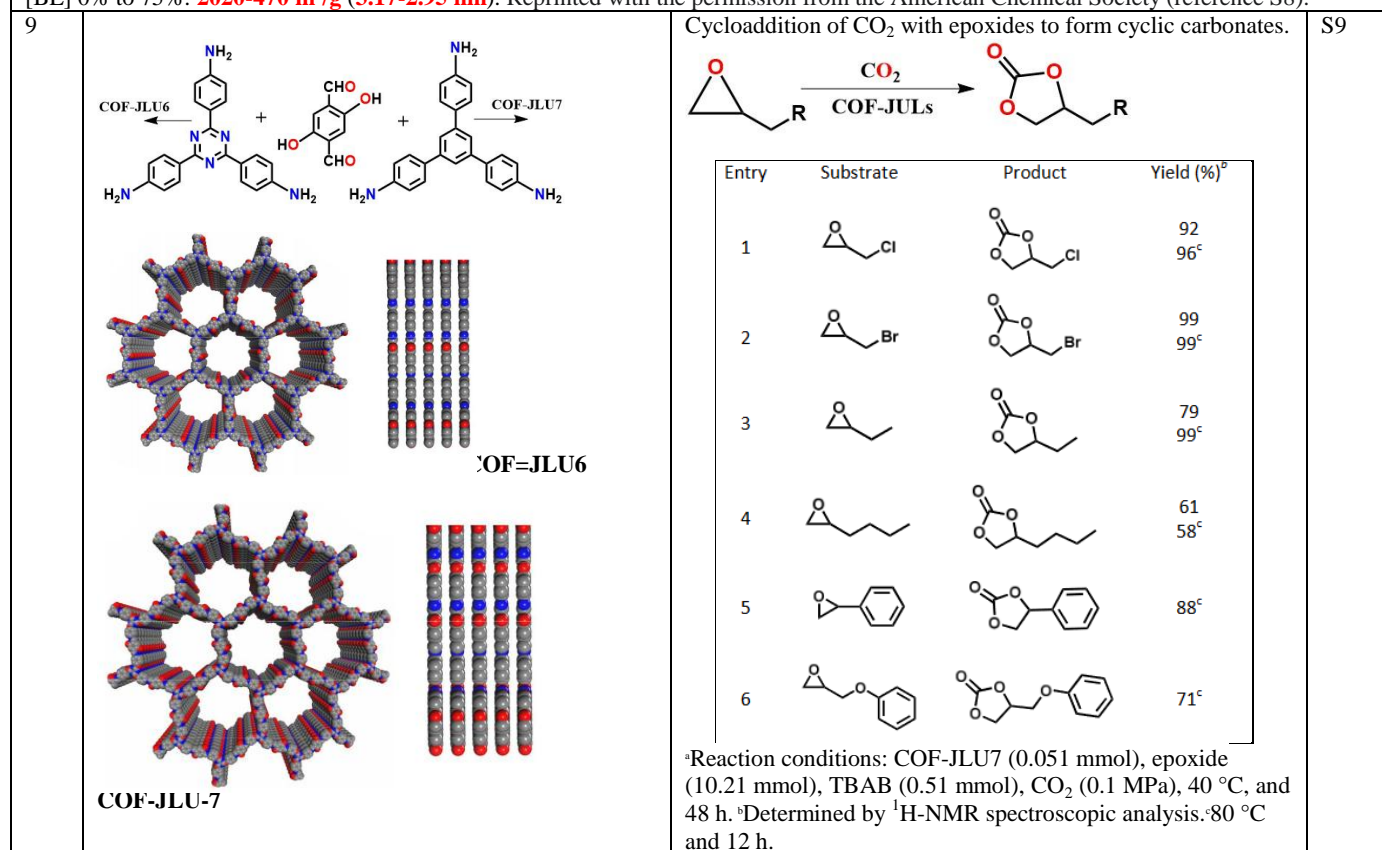

BET surface areas for COF-JLU6 and COF-JLU7 are **1450** and **1392 m<sup>2</sup>/g**. Pore sizes are **3.3** and **3.4 nm** for COF-JLU6 and COF-JLU7. CO<sub>2</sub> uptakes are 129 and 151 mg/g for COF-JLU6 and COF-JLU7 respectively at 273K, 1 bar. Zero loading HOAs are 30.8 and 28.1 kJ/mol for COF-JLU6 and COF-JLU7. Reprinted with the permission from the Royal Society of Chemistry (reference S9).

Biomimetic-catalysis

|    |  |     |
|----|--|-----|
| 10 |  | S10 |
|----|--|-----|

| <p style="text-align: center;"><b>PVP@[SO<sub>3</sub>H]<sub>x</sub>-COF</b><br/>Synthesis scheme of PVP@[SO<sub>3</sub>H]<sub>x</sub>-COF.</p> | <p>Dehydration of fructose to produce 5-hydroxymethylfurfural.</p> <table border="1"> <thead> <tr> <th>Entry</th> <th>Catalyst</th> <th>Time (min)</th> <th>Conv. (%)</th> <th>Select. (%)<sup>b</sup></th> <th>Yield (%)<sup>b</sup></th> </tr> </thead> <tbody> <tr> <td>1<sup>c</sup></td> <td>PVP@[SO<sub>3</sub>H]<sub>0.17</sub>-COF</td> <td>30</td> <td>&gt;99.5</td> <td>99.1</td> <td>99.1</td> </tr> <tr> <td>2</td> <td>[SO<sub>3</sub>H]<sub>0.17</sub>-COF</td> <td>30</td> <td>23.2</td> <td>77.1</td> <td>17.9</td> </tr> <tr> <td></td> <td></td> <td>(120)</td> <td>(94.6)</td> <td>(35.2)</td> <td>(33.3)</td> </tr> <tr> <td>3</td> <td>Nafion<sup>®</sup> NR50</td> <td>30</td> <td>9.7</td> <td>54.6</td> <td>5.3</td> </tr> <tr> <td></td> <td></td> <td>(360)</td> <td>(89.3)</td> <td>(19.4)</td> <td>(17.3)</td> </tr> <tr> <td>4</td> <td>Amberlyst-15</td> <td>30</td> <td>15.3</td> <td>67.1</td> <td>10.3</td> </tr> <tr> <td></td> <td></td> <td>(180)</td> <td>(95.2)</td> <td>(29.5)</td> <td>(28.1)</td> </tr> <tr> <td>5</td> <td>TsOH</td> <td>30</td> <td>28.5</td> <td>73.5</td> <td>20.9</td> </tr> <tr> <td></td> <td></td> <td>(120)</td> <td>(&gt;99.5)</td> <td>(37.8)</td> <td>(37.8)</td> </tr> <tr> <td>6</td> <td>PVP&amp;DVB@[SO<sub>3</sub>H]<sub>0.17</sub>-COF</td> <td>30</td> <td>86.7</td> <td>62.7</td> <td>54.9</td> </tr> <tr> <td>7</td> <td>PVP@[SO<sub>3</sub>H]<sub>0.33</sub>-COF</td> <td>30</td> <td>96.4</td> <td>89.3</td> <td>86.1</td> </tr> <tr> <td>8</td> <td>PVP@[SO<sub>3</sub>H]<sub>0.50</sub>-COF</td> <td>30</td> <td>91.2</td> <td>75.6</td> <td>68.9</td> </tr> <tr> <td>9<sup>d</sup></td> <td>PVP@[SO<sub>3</sub>H]<sub>0.17</sub>-COF</td> <td>30</td> <td>&gt;99.5</td> <td>97.1</td> <td>97.1</td> </tr> <tr> <td>10<sup>e</sup></td> <td>PVP@[SO<sub>3</sub>H]<sub>0.17</sub>-COF</td> <td>30</td> <td>&gt;99.5</td> <td>98.2</td> <td>98.2</td> </tr> </tbody> </table> <p><sup>a</sup> Reaction conditions: fructose (100 mg, 0.56 mmol), catalyst (based on the amount of sulfonic acid 2.0 mol%), 100 °C, THF (3.0 mL), and the reaction time has been optimized; <sup>b</sup> the HMF selectivity and yield were determined by the combination of liquid chromatography and gas chromatography. <sup>c</sup> isolated HMF yield 94.5% (Figure S12). <sup>d</sup> recycle for 5 times. <sup>e</sup> fructose (1.0 g), PVP@[SO<sub>3</sub>H]<sub>0.17</sub>-COF (2.0 mol%), 100 °C, and THF (20 mL) for 30 min; The values in parentheses refer to the time used, as well as the conversion of fructose and selectivity and yield of HMF at that point.</p> | Entry      | Catalyst  | Time (min)               | Conv. (%)              | Select. (%) <sup>b</sup> | Yield (%) <sup>b</sup> | 1 <sup>c</sup> | PVP@[SO <sub>3</sub> H] <sub>0.17</sub> -COF | 30 | >99.5 | 99.1 | 99.1 | 2 | [SO <sub>3</sub> H] <sub>0.17</sub> -COF | 30 | 23.2 | 77.1 | 17.9 |  |  | (120) | (94.6) | (35.2) | (33.3) | 3 | Nafion <sup>®</sup> NR50 | 30 | 9.7 | 54.6 | 5.3 |  |  | (360) | (89.3) | (19.4) | (17.3) | 4 | Amberlyst-15 | 30 | 15.3 | 67.1 | 10.3 |  |  | (180) | (95.2) | (29.5) | (28.1) | 5 | TsOH | 30 | 28.5 | 73.5 | 20.9 |  |  | (120) | (>99.5) | (37.8) | (37.8) | 6 | PVP&DVB@[SO <sub>3</sub> H] <sub>0.17</sub> -COF | 30 | 86.7 | 62.7 | 54.9 | 7 | PVP@[SO <sub>3</sub> H] <sub>0.33</sub> -COF | 30 | 96.4 | 89.3 | 86.1 | 8 | PVP@[SO <sub>3</sub> H] <sub>0.50</sub> -COF | 30 | 91.2 | 75.6 | 68.9 | 9 <sup>d</sup> | PVP@[SO <sub>3</sub> H] <sub>0.17</sub> -COF | 30 | >99.5 | 97.1 | 97.1 | 10 <sup>e</sup> | PVP@[SO <sub>3</sub> H] <sub>0.17</sub> -COF | 30 | >99.5 | 98.2 | 98.2 |
|------------------------------------------------------------------------------------------------------------------------------------------------|-----------------------------------------------------------------------------------------------------------------------------------------------------------------------------------------------------------------------------------------------------------------------------------------------------------------------------------------------------------------------------------------------------------------------------------------------------------------------------------------------------------------------------------------------------------------------------------------------------------------------------------------------------------------------------------------------------------------------------------------------------------------------------------------------------------------------------------------------------------------------------------------------------------------------------------------------------------------------------------------------------------------------------------------------------------------------------------------------------------------------------------------------------------------------------------------------------------------------------------------------------------------------------------------------------------------------------------------------------------------------------------------------------------------------------------------------------------------------------------------------------------------------------------------------------------------------------------------------------------------------------------------------------------------------------------------------------------------------------------------------------------------------------------------------------------------------------------------------------------------------------------------------------------------------------------------------------------------------------------------------------------------------------------------------------------------------------------------------------------------------------------------------------------------------------------------------------------------------------------------------------------------------------------------------------------------------------------------------------------------------------------------------------------------------------------------------------------------------------------------------------------------------------------------------------------------------------------------------------------------------------------------------------|------------|-----------|--------------------------|------------------------|--------------------------|------------------------|----------------|----------------------------------------------|----|-------|------|------|---|------------------------------------------|----|------|------|------|--|--|-------|--------|--------|--------|---|--------------------------|----|-----|------|-----|--|--|-------|--------|--------|--------|---|--------------|----|------|------|------|--|--|-------|--------|--------|--------|---|------|----|------|------|------|--|--|-------|---------|--------|--------|---|--------------------------------------------------|----|------|------|------|---|----------------------------------------------|----|------|------|------|---|----------------------------------------------|----|------|------|------|----------------|----------------------------------------------|----|-------|------|------|-----------------|----------------------------------------------|----|-------|------|------|
| Entry                                                                                                                                          | Catalyst                                                                                                                                                                                                                                                                                                                                                                                                                                                                                                                                                                                                                                                                                                                                                                                                                                                                                                                                                                                                                                                                                                                                                                                                                                                                                                                                                                                                                                                                                                                                                                                                                                                                                                                                                                                                                                                                                                                                                                                                                                                                                                                                                                                                                                                                                                                                                                                                                                                                                                                                                                                                                                            | Time (min) | Conv. (%) | Select. (%) <sup>b</sup> | Yield (%) <sup>b</sup> |                          |                        |                |                                              |    |       |      |      |   |                                          |    |      |      |      |  |  |       |        |        |        |   |                          |    |     |      |     |  |  |       |        |        |        |   |              |    |      |      |      |  |  |       |        |        |        |   |      |    |      |      |      |  |  |       |         |        |        |   |                                                  |    |      |      |      |   |                                              |    |      |      |      |   |                                              |    |      |      |      |                |                                              |    |       |      |      |                 |                                              |    |       |      |      |
| 1 <sup>c</sup>                                                                                                                                 | PVP@[SO <sub>3</sub> H] <sub>0.17</sub> -COF                                                                                                                                                                                                                                                                                                                                                                                                                                                                                                                                                                                                                                                                                                                                                                                                                                                                                                                                                                                                                                                                                                                                                                                                                                                                                                                                                                                                                                                                                                                                                                                                                                                                                                                                                                                                                                                                                                                                                                                                                                                                                                                                                                                                                                                                                                                                                                                                                                                                                                                                                                                                        | 30         | >99.5     | 99.1                     | 99.1                   |                          |                        |                |                                              |    |       |      |      |   |                                          |    |      |      |      |  |  |       |        |        |        |   |                          |    |     |      |     |  |  |       |        |        |        |   |              |    |      |      |      |  |  |       |        |        |        |   |      |    |      |      |      |  |  |       |         |        |        |   |                                                  |    |      |      |      |   |                                              |    |      |      |      |   |                                              |    |      |      |      |                |                                              |    |       |      |      |                 |                                              |    |       |      |      |
| 2                                                                                                                                              | [SO <sub>3</sub> H] <sub>0.17</sub> -COF                                                                                                                                                                                                                                                                                                                                                                                                                                                                                                                                                                                                                                                                                                                                                                                                                                                                                                                                                                                                                                                                                                                                                                                                                                                                                                                                                                                                                                                                                                                                                                                                                                                                                                                                                                                                                                                                                                                                                                                                                                                                                                                                                                                                                                                                                                                                                                                                                                                                                                                                                                                                            | 30         | 23.2      | 77.1                     | 17.9                   |                          |                        |                |                                              |    |       |      |      |   |                                          |    |      |      |      |  |  |       |        |        |        |   |                          |    |     |      |     |  |  |       |        |        |        |   |              |    |      |      |      |  |  |       |        |        |        |   |      |    |      |      |      |  |  |       |         |        |        |   |                                                  |    |      |      |      |   |                                              |    |      |      |      |   |                                              |    |      |      |      |                |                                              |    |       |      |      |                 |                                              |    |       |      |      |
|                                                                                                                                                |                                                                                                                                                                                                                                                                                                                                                                                                                                                                                                                                                                                                                                                                                                                                                                                                                                                                                                                                                                                                                                                                                                                                                                                                                                                                                                                                                                                                                                                                                                                                                                                                                                                                                                                                                                                                                                                                                                                                                                                                                                                                                                                                                                                                                                                                                                                                                                                                                                                                                                                                                                                                                                                     | (120)      | (94.6)    | (35.2)                   | (33.3)                 |                          |                        |                |                                              |    |       |      |      |   |                                          |    |      |      |      |  |  |       |        |        |        |   |                          |    |     |      |     |  |  |       |        |        |        |   |              |    |      |      |      |  |  |       |        |        |        |   |      |    |      |      |      |  |  |       |         |        |        |   |                                                  |    |      |      |      |   |                                              |    |      |      |      |   |                                              |    |      |      |      |                |                                              |    |       |      |      |                 |                                              |    |       |      |      |
| 3                                                                                                                                              | Nafion <sup>®</sup> NR50                                                                                                                                                                                                                                                                                                                                                                                                                                                                                                                                                                                                                                                                                                                                                                                                                                                                                                                                                                                                                                                                                                                                                                                                                                                                                                                                                                                                                                                                                                                                                                                                                                                                                                                                                                                                                                                                                                                                                                                                                                                                                                                                                                                                                                                                                                                                                                                                                                                                                                                                                                                                                            | 30         | 9.7       | 54.6                     | 5.3                    |                          |                        |                |                                              |    |       |      |      |   |                                          |    |      |      |      |  |  |       |        |        |        |   |                          |    |     |      |     |  |  |       |        |        |        |   |              |    |      |      |      |  |  |       |        |        |        |   |      |    |      |      |      |  |  |       |         |        |        |   |                                                  |    |      |      |      |   |                                              |    |      |      |      |   |                                              |    |      |      |      |                |                                              |    |       |      |      |                 |                                              |    |       |      |      |
|                                                                                                                                                |                                                                                                                                                                                                                                                                                                                                                                                                                                                                                                                                                                                                                                                                                                                                                                                                                                                                                                                                                                                                                                                                                                                                                                                                                                                                                                                                                                                                                                                                                                                                                                                                                                                                                                                                                                                                                                                                                                                                                                                                                                                                                                                                                                                                                                                                                                                                                                                                                                                                                                                                                                                                                                                     | (360)      | (89.3)    | (19.4)                   | (17.3)                 |                          |                        |                |                                              |    |       |      |      |   |                                          |    |      |      |      |  |  |       |        |        |        |   |                          |    |     |      |     |  |  |       |        |        |        |   |              |    |      |      |      |  |  |       |        |        |        |   |      |    |      |      |      |  |  |       |         |        |        |   |                                                  |    |      |      |      |   |                                              |    |      |      |      |   |                                              |    |      |      |      |                |                                              |    |       |      |      |                 |                                              |    |       |      |      |
| 4                                                                                                                                              | Amberlyst-15                                                                                                                                                                                                                                                                                                                                                                                                                                                                                                                                                                                                                                                                                                                                                                                                                                                                                                                                                                                                                                                                                                                                                                                                                                                                                                                                                                                                                                                                                                                                                                                                                                                                                                                                                                                                                                                                                                                                                                                                                                                                                                                                                                                                                                                                                                                                                                                                                                                                                                                                                                                                                                        | 30         | 15.3      | 67.1                     | 10.3                   |                          |                        |                |                                              |    |       |      |      |   |                                          |    |      |      |      |  |  |       |        |        |        |   |                          |    |     |      |     |  |  |       |        |        |        |   |              |    |      |      |      |  |  |       |        |        |        |   |      |    |      |      |      |  |  |       |         |        |        |   |                                                  |    |      |      |      |   |                                              |    |      |      |      |   |                                              |    |      |      |      |                |                                              |    |       |      |      |                 |                                              |    |       |      |      |
|                                                                                                                                                |                                                                                                                                                                                                                                                                                                                                                                                                                                                                                                                                                                                                                                                                                                                                                                                                                                                                                                                                                                                                                                                                                                                                                                                                                                                                                                                                                                                                                                                                                                                                                                                                                                                                                                                                                                                                                                                                                                                                                                                                                                                                                                                                                                                                                                                                                                                                                                                                                                                                                                                                                                                                                                                     | (180)      | (95.2)    | (29.5)                   | (28.1)                 |                          |                        |                |                                              |    |       |      |      |   |                                          |    |      |      |      |  |  |       |        |        |        |   |                          |    |     |      |     |  |  |       |        |        |        |   |              |    |      |      |      |  |  |       |        |        |        |   |      |    |      |      |      |  |  |       |         |        |        |   |                                                  |    |      |      |      |   |                                              |    |      |      |      |   |                                              |    |      |      |      |                |                                              |    |       |      |      |                 |                                              |    |       |      |      |
| 5                                                                                                                                              | TsOH                                                                                                                                                                                                                                                                                                                                                                                                                                                                                                                                                                                                                                                                                                                                                                                                                                                                                                                                                                                                                                                                                                                                                                                                                                                                                                                                                                                                                                                                                                                                                                                                                                                                                                                                                                                                                                                                                                                                                                                                                                                                                                                                                                                                                                                                                                                                                                                                                                                                                                                                                                                                                                                | 30         | 28.5      | 73.5                     | 20.9                   |                          |                        |                |                                              |    |       |      |      |   |                                          |    |      |      |      |  |  |       |        |        |        |   |                          |    |     |      |     |  |  |       |        |        |        |   |              |    |      |      |      |  |  |       |        |        |        |   |      |    |      |      |      |  |  |       |         |        |        |   |                                                  |    |      |      |      |   |                                              |    |      |      |      |   |                                              |    |      |      |      |                |                                              |    |       |      |      |                 |                                              |    |       |      |      |
|                                                                                                                                                |                                                                                                                                                                                                                                                                                                                                                                                                                                                                                                                                                                                                                                                                                                                                                                                                                                                                                                                                                                                                                                                                                                                                                                                                                                                                                                                                                                                                                                                                                                                                                                                                                                                                                                                                                                                                                                                                                                                                                                                                                                                                                                                                                                                                                                                                                                                                                                                                                                                                                                                                                                                                                                                     | (120)      | (>99.5)   | (37.8)                   | (37.8)                 |                          |                        |                |                                              |    |       |      |      |   |                                          |    |      |      |      |  |  |       |        |        |        |   |                          |    |     |      |     |  |  |       |        |        |        |   |              |    |      |      |      |  |  |       |        |        |        |   |      |    |      |      |      |  |  |       |         |        |        |   |                                                  |    |      |      |      |   |                                              |    |      |      |      |   |                                              |    |      |      |      |                |                                              |    |       |      |      |                 |                                              |    |       |      |      |
| 6                                                                                                                                              | PVP&DVB@[SO <sub>3</sub> H] <sub>0.17</sub> -COF                                                                                                                                                                                                                                                                                                                                                                                                                                                                                                                                                                                                                                                                                                                                                                                                                                                                                                                                                                                                                                                                                                                                                                                                                                                                                                                                                                                                                                                                                                                                                                                                                                                                                                                                                                                                                                                                                                                                                                                                                                                                                                                                                                                                                                                                                                                                                                                                                                                                                                                                                                                                    | 30         | 86.7      | 62.7                     | 54.9                   |                          |                        |                |                                              |    |       |      |      |   |                                          |    |      |      |      |  |  |       |        |        |        |   |                          |    |     |      |     |  |  |       |        |        |        |   |              |    |      |      |      |  |  |       |        |        |        |   |      |    |      |      |      |  |  |       |         |        |        |   |                                                  |    |      |      |      |   |                                              |    |      |      |      |   |                                              |    |      |      |      |                |                                              |    |       |      |      |                 |                                              |    |       |      |      |
| 7                                                                                                                                              | PVP@[SO <sub>3</sub> H] <sub>0.33</sub> -COF                                                                                                                                                                                                                                                                                                                                                                                                                                                                                                                                                                                                                                                                                                                                                                                                                                                                                                                                                                                                                                                                                                                                                                                                                                                                                                                                                                                                                                                                                                                                                                                                                                                                                                                                                                                                                                                                                                                                                                                                                                                                                                                                                                                                                                                                                                                                                                                                                                                                                                                                                                                                        | 30         | 96.4      | 89.3                     | 86.1                   |                          |                        |                |                                              |    |       |      |      |   |                                          |    |      |      |      |  |  |       |        |        |        |   |                          |    |     |      |     |  |  |       |        |        |        |   |              |    |      |      |      |  |  |       |        |        |        |   |      |    |      |      |      |  |  |       |         |        |        |   |                                                  |    |      |      |      |   |                                              |    |      |      |      |   |                                              |    |      |      |      |                |                                              |    |       |      |      |                 |                                              |    |       |      |      |
| 8                                                                                                                                              | PVP@[SO <sub>3</sub> H] <sub>0.50</sub> -COF                                                                                                                                                                                                                                                                                                                                                                                                                                                                                                                                                                                                                                                                                                                                                                                                                                                                                                                                                                                                                                                                                                                                                                                                                                                                                                                                                                                                                                                                                                                                                                                                                                                                                                                                                                                                                                                                                                                                                                                                                                                                                                                                                                                                                                                                                                                                                                                                                                                                                                                                                                                                        | 30         | 91.2      | 75.6                     | 68.9                   |                          |                        |                |                                              |    |       |      |      |   |                                          |    |      |      |      |  |  |       |        |        |        |   |                          |    |     |      |     |  |  |       |        |        |        |   |              |    |      |      |      |  |  |       |        |        |        |   |      |    |      |      |      |  |  |       |         |        |        |   |                                                  |    |      |      |      |   |                                              |    |      |      |      |   |                                              |    |      |      |      |                |                                              |    |       |      |      |                 |                                              |    |       |      |      |
| 9 <sup>d</sup>                                                                                                                                 | PVP@[SO <sub>3</sub> H] <sub>0.17</sub> -COF                                                                                                                                                                                                                                                                                                                                                                                                                                                                                                                                                                                                                                                                                                                                                                                                                                                                                                                                                                                                                                                                                                                                                                                                                                                                                                                                                                                                                                                                                                                                                                                                                                                                                                                                                                                                                                                                                                                                                                                                                                                                                                                                                                                                                                                                                                                                                                                                                                                                                                                                                                                                        | 30         | >99.5     | 97.1                     | 97.1                   |                          |                        |                |                                              |    |       |      |      |   |                                          |    |      |      |      |  |  |       |        |        |        |   |                          |    |     |      |     |  |  |       |        |        |        |   |              |    |      |      |      |  |  |       |        |        |        |   |      |    |      |      |      |  |  |       |         |        |        |   |                                                  |    |      |      |      |   |                                              |    |      |      |      |   |                                              |    |      |      |      |                |                                              |    |       |      |      |                 |                                              |    |       |      |      |
| 10 <sup>e</sup>                                                                                                                                | PVP@[SO <sub>3</sub> H] <sub>0.17</sub> -COF                                                                                                                                                                                                                                                                                                                                                                                                                                                                                                                                                                                                                                                                                                                                                                                                                                                                                                                                                                                                                                                                                                                                                                                                                                                                                                                                                                                                                                                                                                                                                                                                                                                                                                                                                                                                                                                                                                                                                                                                                                                                                                                                                                                                                                                                                                                                                                                                                                                                                                                                                                                                        | 30         | >99.5     | 98.2                     | 98.2                   |                          |                        |                |                                              |    |       |      |      |   |                                          |    |      |      |      |  |  |       |        |        |        |   |                          |    |     |      |     |  |  |       |        |        |        |   |              |    |      |      |      |  |  |       |        |        |        |   |      |    |      |      |      |  |  |       |         |        |        |   |                                                  |    |      |      |      |   |                                              |    |      |      |      |   |                                              |    |      |      |      |                |                                              |    |       |      |      |                 |                                              |    |       |      |      |

BET SA: [OH]<sub>0.17</sub>-COF: **1898 m<sup>2</sup>/g**. [SO<sub>3</sub>H]<sub>0.17</sub>-COF: **1510 m<sup>2</sup>/g** (pore size = **3.3 nm**). PVP@[SO<sub>3</sub>H]<sub>0.17</sub>-COF: **644 m<sup>2</sup>/g**. Reprinted with the permission from the Wiley Online Library (reference S10).

|                                                                                  |                                                                                                                                                                                                   |            |
|----------------------------------------------------------------------------------|---------------------------------------------------------------------------------------------------------------------------------------------------------------------------------------------------|------------|
| <p>11</p> <p style="text-align: center;"><b>TFP-DABA-eclipsed</b><br/>5.47 Å</p> | <p>Synthesis of 5-hydroxymethylfurfural from fructose using TFP-DABA.</p> <p>Yield: &gt; 90% for HMF.</p> <p>One-pot synthesis of DFF from fructose catalyzed by TFP-DABA and KBr. Yield 65%.</p> | <p>S11</p> |
|----------------------------------------------------------------------------------|---------------------------------------------------------------------------------------------------------------------------------------------------------------------------------------------------|------------|

The amount of dangling sulfonic acid groups in TFP-DABA is estimated to be **3.15 mmol/g** by acid–base titration, which is comparable to the theoretical value of 3.42mmol/g. BET SA is **158 m<sup>2</sup>/g** and the pore size is **1.4 nm**. Reprinted with the permission from the Wiley Online Library (reference S11).

### Epoxidation Reaction

| 12           | 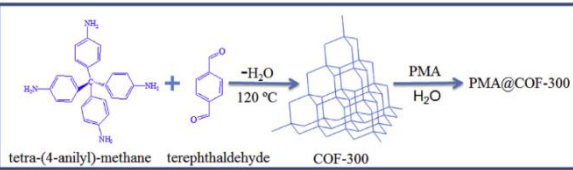 <p>tetra-(4-anilyl)-methane + terephthalaldehyde <math>\xrightarrow{-\text{H}_2\text{O}, 120^\circ\text{C}}</math> COF-300 <math>\xrightarrow{\text{PMA}, \text{H}_2\text{O}}</math> PMA@COF-300</p> <p>12-phosphomolybdic acid (PMA) immobilized in the COF.<br/>Preparation conditions and doping levels of catalysts.</p> <table border="1"> <thead> <tr> <th>Catalyst</th> <th>Temp. (°C)</th> <th>Mo (%)</th> <th>PMA (mmol/g)</th> </tr> </thead> <tbody> <tr> <td>PMA@COF-300a</td> <td>20</td> <td>4.13</td> <td>0.04</td> </tr> <tr> <td>PMA@COF-300b</td> <td>80</td> <td>4.22</td> <td>0.04</td> </tr> <tr> <td>PMA@COF-300c</td> <td>80</td> <td>16.22</td> <td>0.14</td> </tr> </tbody> </table> | Catalyst | Temp. (°C)   | Mo (%) | PMA (mmol/g) | PMA@COF-300a | 20 | 4.13 | 0.04 | PMA@COF-300b | 80 | 4.22 | 0.04 | PMA@COF-300c | 80 | 16.22 | 0.14 | <p>Olefin epoxidation.</p>  <p>Yield: ~17-99%. TOF: 16-162.</p> <p>(i) High selectivity of epoxycyclooctane in 3 h at 50 °C.<br/>(ii) Notably, the relatively inert terminal alkene of 1-octene can also be converted to epoxide at a reaction temperature of 60 °C.<br/>(iii) It was found that this relatively bulky cyclododcene (with kinetic diameter of around 8 Å) could also be converted to corresponding epoxide over the PMA supported catalysts.</p> <p>Reprinted with the permission from the Elsevier (reference S12).</p> | S12 |
|--------------|-------------------------------------------------------------------------------------------------------------------------------------------------------------------------------------------------------------------------------------------------------------------------------------------------------------------------------------------------------------------------------------------------------------------------------------------------------------------------------------------------------------------------------------------------------------------------------------------------------------------------------------------------------------------------------------------------------------------------------------------------------------------------------------------------|----------|--------------|--------|--------------|--------------|----|------|------|--------------|----|------|------|--------------|----|-------|------|----------------------------------------------------------------------------------------------------------------------------------------------------------------------------------------------------------------------------------------------------------------------------------------------------------------------------------------------------------------------------------------------------------------------------------------------------------------------------------------------------------------------------------------------------------------------------------------------------------------------------|-----|
| Catalyst     | Temp. (°C)                                                                                                                                                                                                                                                                                                                                                                                                                                                                                                                                                                                                                                                                                                                                                                                      | Mo (%)   | PMA (mmol/g) |        |              |              |    |      |      |              |    |      |      |              |    |       |      |                                                                                                                                                                                                                                                                                                                                                                                                                                                                                                                                                                                                                            |     |
| PMA@COF-300a | 20                                                                                                                                                                                                                                                                                                                                                                                                                                                                                                                                                                                                                                                                                                                                                                                              | 4.13     | 0.04         |        |              |              |    |      |      |              |    |      |      |              |    |       |      |                                                                                                                                                                                                                                                                                                                                                                                                                                                                                                                                                                                                                            |     |
| PMA@COF-300b | 80                                                                                                                                                                                                                                                                                                                                                                                                                                                                                                                                                                                                                                                                                                                                                                                              | 4.22     | 0.04         |        |              |              |    |      |      |              |    |      |      |              |    |       |      |                                                                                                                                                                                                                                                                                                                                                                                                                                                                                                                                                                                                                            |     |
| PMA@COF-300c | 80                                                                                                                                                                                                                                                                                                                                                                                                                                                                                                                                                                                                                                                                                                                                                                                              | 16.22    | 0.14         |        |              |              |    |      |      |              |    |      |      |              |    |       |      |                                                                                                                                                                                                                                                                                                                                                                                                                                                                                                                                                                                                                            |     |

| <b>Michael addition and Diels-Alder reaction</b> |                                                                                                                                                                                                                                                                                                                                                                                                                                                                                                                                                                                                                                                                                                                                                                                                                          |                                                                                                                                                                                                                                                                                                                                                                                                                                                                                                                                                                                                                                                                                                                                                                                                                                                                                                                                                                        |        |                              |    |        |         |     |       |    |                                           |   |       |    |                                           |     |       |    |                                           |   |       |    |                                            |   |       |    |     |
|--------------------------------------------------|--------------------------------------------------------------------------------------------------------------------------------------------------------------------------------------------------------------------------------------------------------------------------------------------------------------------------------------------------------------------------------------------------------------------------------------------------------------------------------------------------------------------------------------------------------------------------------------------------------------------------------------------------------------------------------------------------------------------------------------------------------------------------------------------------------------------------|------------------------------------------------------------------------------------------------------------------------------------------------------------------------------------------------------------------------------------------------------------------------------------------------------------------------------------------------------------------------------------------------------------------------------------------------------------------------------------------------------------------------------------------------------------------------------------------------------------------------------------------------------------------------------------------------------------------------------------------------------------------------------------------------------------------------------------------------------------------------------------------------------------------------------------------------------------------------|--------|------------------------------|----|--------|---------|-----|-------|----|-------------------------------------------|---|-------|----|-------------------------------------------|-----|-------|----|-------------------------------------------|---|-------|----|--------------------------------------------|---|-------|----|-----|
| 13                                               | 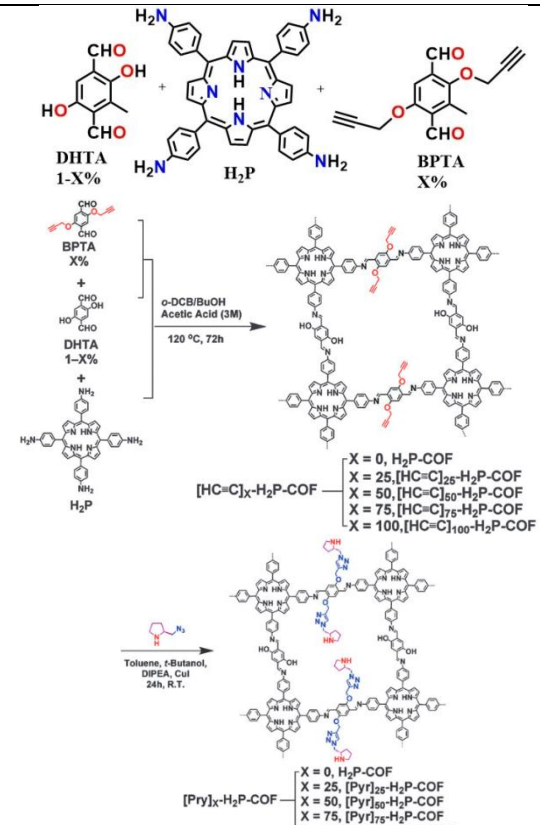 <p>DHTA 1-X% + H<sub>2</sub>P + BPTA X% <math>\xrightarrow{o\text{-DCB/BuOH}, \text{Acetic Acid (3M)}, 120^\circ\text{C}, 72\text{h}}</math> [HC=C]<sub>X</sub>-H<sub>2</sub>P-COF</p> <p>[HC=C]<sub>X</sub>-H<sub>2</sub>P-COF: X = 0, H<sub>2</sub>P-COF; X = 25, [HC=C]<sub>25</sub>-H<sub>2</sub>P-COF; X = 50, [HC=C]<sub>50</sub>-H<sub>2</sub>P-COF; X = 75, [HC=C]<sub>75</sub>-H<sub>2</sub>P-COF; X = 100, [HC=C]<sub>100</sub>-H<sub>2</sub>P-COF</p> <p>[Pyr]<sub>X</sub>-H<sub>2</sub>P-COF: X = 0, H<sub>2</sub>P-COF; X = 25, [Pyr]<sub>25</sub>-H<sub>2</sub>P-COF; X = 50, [Pyr]<sub>50</sub>-H<sub>2</sub>P-COF; X = 75, [Pyr]<sub>75</sub>-H<sub>2</sub>P-COF; X = 100, [Pyr]<sub>100</sub>-H<sub>2</sub>P-COF</p> | <p>Michael addition reaction</p>  <table border="1"> <thead> <tr> <th></th> <th>Time for 100% conversion (h)</th> <th>dr</th> <th>ee (%)</th> </tr> </thead> <tbody> <tr> <td>Control</td> <td>3.3</td> <td>60/40</td> <td>49</td> </tr> <tr> <td>[Pyr]<sub>25</sub>-H<sub>2</sub>P-COF</td> <td>1</td> <td>70/30</td> <td>49</td> </tr> <tr> <td>[Pyr]<sub>50</sub>-H<sub>2</sub>P-COF</td> <td>2.5</td> <td>70/30</td> <td>50</td> </tr> <tr> <td>[Pyr]<sub>75</sub>-H<sub>2</sub>P-COF</td> <td>5</td> <td>70/30</td> <td>51</td> </tr> <tr> <td>[Pyr]<sub>100</sub>-H<sub>2</sub>P-COF</td> <td>9</td> <td>65/35</td> <td>44</td> </tr> </tbody> </table>  <p>Flow reaction system for the organocatalytic COF column.</p> <p>100% Conversion<br/>dr = 65/35, ee = 44%<br/>for &gt; 48 h</p> |        | Time for 100% conversion (h) | dr | ee (%) | Control | 3.3 | 60/40 | 49 | [Pyr] <sub>25</sub> -H <sub>2</sub> P-COF | 1 | 70/30 | 49 | [Pyr] <sub>50</sub> -H <sub>2</sub> P-COF | 2.5 | 70/30 | 50 | [Pyr] <sub>75</sub> -H <sub>2</sub> P-COF | 5 | 70/30 | 51 | [Pyr] <sub>100</sub> -H <sub>2</sub> P-COF | 9 | 65/35 | 44 | S13 |
|                                                  | Time for 100% conversion (h)                                                                                                                                                                                                                                                                                                                                                                                                                                                                                                                                                                                                                                                                                                                                                                                             | dr                                                                                                                                                                                                                                                                                                                                                                                                                                                                                                                                                                                                                                                                                                                                                                                                                                                                                                                                                                     | ee (%) |                              |    |        |         |     |       |    |                                           |   |       |    |                                           |     |       |    |                                           |   |       |    |                                            |   |       |    |     |
| Control                                          | 3.3                                                                                                                                                                                                                                                                                                                                                                                                                                                                                                                                                                                                                                                                                                                                                                                                                      | 60/40                                                                                                                                                                                                                                                                                                                                                                                                                                                                                                                                                                                                                                                                                                                                                                                                                                                                                                                                                                  | 49     |                              |    |        |         |     |       |    |                                           |   |       |    |                                           |     |       |    |                                           |   |       |    |                                            |   |       |    |     |
| [Pyr] <sub>25</sub> -H <sub>2</sub> P-COF        | 1                                                                                                                                                                                                                                                                                                                                                                                                                                                                                                                                                                                                                                                                                                                                                                                                                        | 70/30                                                                                                                                                                                                                                                                                                                                                                                                                                                                                                                                                                                                                                                                                                                                                                                                                                                                                                                                                                  | 49     |                              |    |        |         |     |       |    |                                           |   |       |    |                                           |     |       |    |                                           |   |       |    |                                            |   |       |    |     |
| [Pyr] <sub>50</sub> -H <sub>2</sub> P-COF        | 2.5                                                                                                                                                                                                                                                                                                                                                                                                                                                                                                                                                                                                                                                                                                                                                                                                                      | 70/30                                                                                                                                                                                                                                                                                                                                                                                                                                                                                                                                                                                                                                                                                                                                                                                                                                                                                                                                                                  | 50     |                              |    |        |         |     |       |    |                                           |   |       |    |                                           |     |       |    |                                           |   |       |    |                                            |   |       |    |     |
| [Pyr] <sub>75</sub> -H <sub>2</sub> P-COF        | 5                                                                                                                                                                                                                                                                                                                                                                                                                                                                                                                                                                                                                                                                                                                                                                                                                        | 70/30                                                                                                                                                                                                                                                                                                                                                                                                                                                                                                                                                                                                                                                                                                                                                                                                                                                                                                                                                                  | 51     |                              |    |        |         |     |       |    |                                           |   |       |    |                                           |     |       |    |                                           |   |       |    |                                            |   |       |    |     |
| [Pyr] <sub>100</sub> -H <sub>2</sub> P-COF       | 9                                                                                                                                                                                                                                                                                                                                                                                                                                                                                                                                                                                                                                                                                                                                                                                                                        | 65/35                                                                                                                                                                                                                                                                                                                                                                                                                                                                                                                                                                                                                                                                                                                                                                                                                                                                                                                                                                  | 44     |                              |    |        |         |     |       |    |                                           |   |       |    |                                           |     |       |    |                                           |   |       |    |                                            |   |       |    |     |

BET SA of COF-SQ is **1195 m<sup>2</sup>/g** and pore size is **3.6 nm**. Reprinted with the permission from the Royal Society of Chemistry (reference S13).

|    |                                                                                                   |                                                                                                                                                                                                                                                                                                                                                      |     |
|----|---------------------------------------------------------------------------------------------------|------------------------------------------------------------------------------------------------------------------------------------------------------------------------------------------------------------------------------------------------------------------------------------------------------------------------------------------------------|-----|
| 14 | 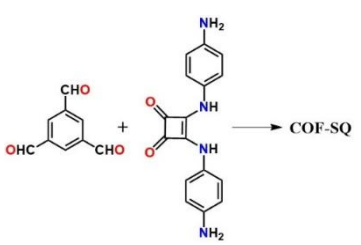 <p>COF-SQ</p> |  <p>R: H, CH<sub>3</sub>, OCH<sub>3</sub>, Cl, Br. R<sub>1</sub>: H, CH<sub>3</sub>. R<sub>2</sub>: H, OCH<sub>3</sub>, OC<sub>2</sub>H<sub>5</sub>. Yield: 63-98%.</p> <p>Michael addition reaction between b-nitrostyrene and 2,4-pentanedione<sup>a</sup></p> | S14 |
|----|---------------------------------------------------------------------------------------------------|------------------------------------------------------------------------------------------------------------------------------------------------------------------------------------------------------------------------------------------------------------------------------------------------------------------------------------------------------|-----|



| 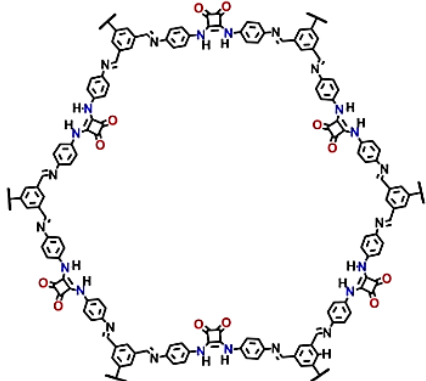 <p>The framework provides efficient hydrogen bonding interaction leading to the catalysis.</p> |                                                                                                                                                                                                                                                                                                                                                                                                                                                                                                                                                                                                                                                                                                                                                                                                                                                                                                                                                                                                                                                                                                                                                                                                                                                                                                                                                                                                                                                                                                                                                                                                                                                                                                                                                                  |           |          |                                 |                        |         |                        |   |        |    |    |         |    |   |        |    |    |     |    |   |        |    |    |         |    |   |        |    |    |                                 |    |   |        |    |    |                   |    |   |        |    |    |      |    |   |        |    |    |      |    |   |        |    |    |                    |    |   |        |      |    |         |    |    |        |    |    |         |    |    |                     |    |    |         |    |    |           |    |    |         |    |    |           |    |    |         |       |    |                  |    |    |         |    |    |                    |    |    |         |
|----------------------------------------------------------------------------------------------------------------------------------------------------------------------------------|----------------------------------------------------------------------------------------------------------------------------------------------------------------------------------------------------------------------------------------------------------------------------------------------------------------------------------------------------------------------------------------------------------------------------------------------------------------------------------------------------------------------------------------------------------------------------------------------------------------------------------------------------------------------------------------------------------------------------------------------------------------------------------------------------------------------------------------------------------------------------------------------------------------------------------------------------------------------------------------------------------------------------------------------------------------------------------------------------------------------------------------------------------------------------------------------------------------------------------------------------------------------------------------------------------------------------------------------------------------------------------------------------------------------------------------------------------------------------------------------------------------------------------------------------------------------------------------------------------------------------------------------------------------------------------------------------------------------------------------------------------------------------------------------------------------------------------------------------|-----------|----------|---------------------------------|------------------------|---------|------------------------|---|--------|----|----|---------|----|---|--------|----|----|-----|----|---|--------|----|----|---------|----|---|--------|----|----|---------------------------------|----|---|--------|----|----|-------------------|----|---|--------|----|----|------|----|---|--------|----|----|------|----|---|--------|----|----|--------------------|----|---|--------|------|----|---------|----|----|--------|----|----|---------|----|----|---------------------|----|----|---------|----|----|-----------|----|----|---------|----|----|-----------|----|----|---------|-------|----|------------------|----|----|---------|----|----|--------------------|----|----|---------|
|                                                                                                                                                                                  | <table border="1"> <thead> <tr> <th>Entry</th> <th>Catalyst</th> <th>Temp (°C)</th> <th>Time (h)</th> <th>Solvent</th> <th>Yield<sup>b</sup> (%)</th> </tr> </thead> <tbody> <tr><td>1</td><td>COF-SQ</td><td>50</td><td>24</td><td>Toluene</td><td>95</td></tr> <tr><td>2</td><td>COF-SQ</td><td>50</td><td>24</td><td>THF</td><td>70</td></tr> <tr><td>3</td><td>COF-SQ</td><td>50</td><td>24</td><td>Acetone</td><td>40</td></tr> <tr><td>4</td><td>COF-SQ</td><td>50</td><td>24</td><td>CH<sub>2</sub>Cl<sub>2</sub></td><td>99</td></tr> <tr><td>5</td><td>COF-SQ</td><td>50</td><td>24</td><td>CHCl<sub>3</sub></td><td>76</td></tr> <tr><td>6</td><td>COF-SQ</td><td>50</td><td>24</td><td>DMSO</td><td>88</td></tr> <tr><td>7</td><td>COF-SQ</td><td>50</td><td>24</td><td>MeOH</td><td>33</td></tr> <tr><td>8</td><td>COF-SQ</td><td>50</td><td>24</td><td>CH<sub>3</sub>CN</td><td>79</td></tr> <tr><td>9</td><td>COF-SQ</td><td>r.t.</td><td>24</td><td>Toluene</td><td>75</td></tr> <tr><td>10</td><td>COF-SQ</td><td>60</td><td>24</td><td>Toluene</td><td>98</td></tr> <tr><td>11</td><td>COF-SQ<sup>c</sup></td><td>50</td><td>24</td><td>Toluene</td><td>64</td></tr> <tr><td>12</td><td>Monomer 1</td><td>50</td><td>24</td><td>Toluene</td><td>35</td></tr> <tr><td>13</td><td>Monomer 2</td><td>50</td><td>24</td><td>Toluene</td><td>Trace</td></tr> <tr><td>14</td><td>Model compound 4</td><td>50</td><td>24</td><td>Toluene</td><td>63</td></tr> <tr><td>15</td><td>2DP<sub>1+5</sub></td><td>50</td><td>24</td><td>Toluene</td><td>Trace</td></tr> </tbody> </table> <p><sup>a</sup> Reaction condition: <b>1a</b> (0.10 mmol), <b>2a</b> (0.15 mmol), <b>COF-SQ</b> (10 mol%) in 1.0 mL solvent. <sup>b</sup> Determined by <sup>1</sup>H NMR spectroscopy of the crude mixture. <sup>c</sup> <b>COF-SQ</b> (5 mol%).</p> | Entry     | Catalyst | Temp (°C)                       | Time (h)               | Solvent | Yield <sup>b</sup> (%) | 1 | COF-SQ | 50 | 24 | Toluene | 95 | 2 | COF-SQ | 50 | 24 | THF | 70 | 3 | COF-SQ | 50 | 24 | Acetone | 40 | 4 | COF-SQ | 50 | 24 | CH <sub>2</sub> Cl <sub>2</sub> | 99 | 5 | COF-SQ | 50 | 24 | CHCl <sub>3</sub> | 76 | 6 | COF-SQ | 50 | 24 | DMSO | 88 | 7 | COF-SQ | 50 | 24 | MeOH | 33 | 8 | COF-SQ | 50 | 24 | CH <sub>3</sub> CN | 79 | 9 | COF-SQ | r.t. | 24 | Toluene | 75 | 10 | COF-SQ | 60 | 24 | Toluene | 98 | 11 | COF-SQ <sup>c</sup> | 50 | 24 | Toluene | 64 | 12 | Monomer 1 | 50 | 24 | Toluene | 35 | 13 | Monomer 2 | 50 | 24 | Toluene | Trace | 14 | Model compound 4 | 50 | 24 | Toluene | 63 | 15 | 2DP <sub>1+5</sub> | 50 | 24 | Toluene |
| Entry                                                                                                                                                                            | Catalyst                                                                                                                                                                                                                                                                                                                                                                                                                                                                                                                                                                                                                                                                                                                                                                                                                                                                                                                                                                                                                                                                                                                                                                                                                                                                                                                                                                                                                                                                                                                                                                                                                                                                                                                                                                                                                                           | Temp (°C) | Time (h) | Solvent                         | Yield <sup>b</sup> (%) |         |                        |   |        |    |    |         |    |   |        |    |    |     |    |   |        |    |    |         |    |   |        |    |    |                                 |    |   |        |    |    |                   |    |   |        |    |    |      |    |   |        |    |    |      |    |   |        |    |    |                    |    |   |        |      |    |         |    |    |        |    |    |         |    |    |                     |    |    |         |    |    |           |    |    |         |    |    |           |    |    |         |       |    |                  |    |    |         |    |    |                    |    |    |         |
| 1                                                                                                                                                                                | COF-SQ                                                                                                                                                                                                                                                                                                                                                                                                                                                                                                                                                                                                                                                                                                                                                                                                                                                                                                                                                                                                                                                                                                                                                                                                                                                                                                                                                                                                                                                                                                                                                                                                                                                                                                                                                                                                                                             | 50        | 24       | Toluene                         | 95                     |         |                        |   |        |    |    |         |    |   |        |    |    |     |    |   |        |    |    |         |    |   |        |    |    |                                 |    |   |        |    |    |                   |    |   |        |    |    |      |    |   |        |    |    |      |    |   |        |    |    |                    |    |   |        |      |    |         |    |    |        |    |    |         |    |    |                     |    |    |         |    |    |           |    |    |         |    |    |           |    |    |         |       |    |                  |    |    |         |    |    |                    |    |    |         |
| 2                                                                                                                                                                                | COF-SQ                                                                                                                                                                                                                                                                                                                                                                                                                                                                                                                                                                                                                                                                                                                                                                                                                                                                                                                                                                                                                                                                                                                                                                                                                                                                                                                                                                                                                                                                                                                                                                                                                                                                                                                                                                                                                                             | 50        | 24       | THF                             | 70                     |         |                        |   |        |    |    |         |    |   |        |    |    |     |    |   |        |    |    |         |    |   |        |    |    |                                 |    |   |        |    |    |                   |    |   |        |    |    |      |    |   |        |    |    |      |    |   |        |    |    |                    |    |   |        |      |    |         |    |    |        |    |    |         |    |    |                     |    |    |         |    |    |           |    |    |         |    |    |           |    |    |         |       |    |                  |    |    |         |    |    |                    |    |    |         |
| 3                                                                                                                                                                                | COF-SQ                                                                                                                                                                                                                                                                                                                                                                                                                                                                                                                                                                                                                                                                                                                                                                                                                                                                                                                                                                                                                                                                                                                                                                                                                                                                                                                                                                                                                                                                                                                                                                                                                                                                                                                                                                                                                                             | 50        | 24       | Acetone                         | 40                     |         |                        |   |        |    |    |         |    |   |        |    |    |     |    |   |        |    |    |         |    |   |        |    |    |                                 |    |   |        |    |    |                   |    |   |        |    |    |      |    |   |        |    |    |      |    |   |        |    |    |                    |    |   |        |      |    |         |    |    |        |    |    |         |    |    |                     |    |    |         |    |    |           |    |    |         |    |    |           |    |    |         |       |    |                  |    |    |         |    |    |                    |    |    |         |
| 4                                                                                                                                                                                | COF-SQ                                                                                                                                                                                                                                                                                                                                                                                                                                                                                                                                                                                                                                                                                                                                                                                                                                                                                                                                                                                                                                                                                                                                                                                                                                                                                                                                                                                                                                                                                                                                                                                                                                                                                                                                                                                                                                             | 50        | 24       | CH <sub>2</sub> Cl <sub>2</sub> | 99                     |         |                        |   |        |    |    |         |    |   |        |    |    |     |    |   |        |    |    |         |    |   |        |    |    |                                 |    |   |        |    |    |                   |    |   |        |    |    |      |    |   |        |    |    |      |    |   |        |    |    |                    |    |   |        |      |    |         |    |    |        |    |    |         |    |    |                     |    |    |         |    |    |           |    |    |         |    |    |           |    |    |         |       |    |                  |    |    |         |    |    |                    |    |    |         |
| 5                                                                                                                                                                                | COF-SQ                                                                                                                                                                                                                                                                                                                                                                                                                                                                                                                                                                                                                                                                                                                                                                                                                                                                                                                                                                                                                                                                                                                                                                                                                                                                                                                                                                                                                                                                                                                                                                                                                                                                                                                                                                                                                                             | 50        | 24       | CHCl <sub>3</sub>               | 76                     |         |                        |   |        |    |    |         |    |   |        |    |    |     |    |   |        |    |    |         |    |   |        |    |    |                                 |    |   |        |    |    |                   |    |   |        |    |    |      |    |   |        |    |    |      |    |   |        |    |    |                    |    |   |        |      |    |         |    |    |        |    |    |         |    |    |                     |    |    |         |    |    |           |    |    |         |    |    |           |    |    |         |       |    |                  |    |    |         |    |    |                    |    |    |         |
| 6                                                                                                                                                                                | COF-SQ                                                                                                                                                                                                                                                                                                                                                                                                                                                                                                                                                                                                                                                                                                                                                                                                                                                                                                                                                                                                                                                                                                                                                                                                                                                                                                                                                                                                                                                                                                                                                                                                                                                                                                                                                                                                                                             | 50        | 24       | DMSO                            | 88                     |         |                        |   |        |    |    |         |    |   |        |    |    |     |    |   |        |    |    |         |    |   |        |    |    |                                 |    |   |        |    |    |                   |    |   |        |    |    |      |    |   |        |    |    |      |    |   |        |    |    |                    |    |   |        |      |    |         |    |    |        |    |    |         |    |    |                     |    |    |         |    |    |           |    |    |         |    |    |           |    |    |         |       |    |                  |    |    |         |    |    |                    |    |    |         |
| 7                                                                                                                                                                                | COF-SQ                                                                                                                                                                                                                                                                                                                                                                                                                                                                                                                                                                                                                                                                                                                                                                                                                                                                                                                                                                                                                                                                                                                                                                                                                                                                                                                                                                                                                                                                                                                                                                                                                                                                                                                                                                                                                                             | 50        | 24       | MeOH                            | 33                     |         |                        |   |        |    |    |         |    |   |        |    |    |     |    |   |        |    |    |         |    |   |        |    |    |                                 |    |   |        |    |    |                   |    |   |        |    |    |      |    |   |        |    |    |      |    |   |        |    |    |                    |    |   |        |      |    |         |    |    |        |    |    |         |    |    |                     |    |    |         |    |    |           |    |    |         |    |    |           |    |    |         |       |    |                  |    |    |         |    |    |                    |    |    |         |
| 8                                                                                                                                                                                | COF-SQ                                                                                                                                                                                                                                                                                                                                                                                                                                                                                                                                                                                                                                                                                                                                                                                                                                                                                                                                                                                                                                                                                                                                                                                                                                                                                                                                                                                                                                                                                                                                                                                                                                                                                                                                                                                                                                             | 50        | 24       | CH <sub>3</sub> CN              | 79                     |         |                        |   |        |    |    |         |    |   |        |    |    |     |    |   |        |    |    |         |    |   |        |    |    |                                 |    |   |        |    |    |                   |    |   |        |    |    |      |    |   |        |    |    |      |    |   |        |    |    |                    |    |   |        |      |    |         |    |    |        |    |    |         |    |    |                     |    |    |         |    |    |           |    |    |         |    |    |           |    |    |         |       |    |                  |    |    |         |    |    |                    |    |    |         |
| 9                                                                                                                                                                                | COF-SQ                                                                                                                                                                                                                                                                                                                                                                                                                                                                                                                                                                                                                                                                                                                                                                                                                                                                                                                                                                                                                                                                                                                                                                                                                                                                                                                                                                                                                                                                                                                                                                                                                                                                                                                                                                                                                                             | r.t.      | 24       | Toluene                         | 75                     |         |                        |   |        |    |    |         |    |   |        |    |    |     |    |   |        |    |    |         |    |   |        |    |    |                                 |    |   |        |    |    |                   |    |   |        |    |    |      |    |   |        |    |    |      |    |   |        |    |    |                    |    |   |        |      |    |         |    |    |        |    |    |         |    |    |                     |    |    |         |    |    |           |    |    |         |    |    |           |    |    |         |       |    |                  |    |    |         |    |    |                    |    |    |         |
| 10                                                                                                                                                                               | COF-SQ                                                                                                                                                                                                                                                                                                                                                                                                                                                                                                                                                                                                                                                                                                                                                                                                                                                                                                                                                                                                                                                                                                                                                                                                                                                                                                                                                                                                                                                                                                                                                                                                                                                                                                                                                                                                                                             | 60        | 24       | Toluene                         | 98                     |         |                        |   |        |    |    |         |    |   |        |    |    |     |    |   |        |    |    |         |    |   |        |    |    |                                 |    |   |        |    |    |                   |    |   |        |    |    |      |    |   |        |    |    |      |    |   |        |    |    |                    |    |   |        |      |    |         |    |    |        |    |    |         |    |    |                     |    |    |         |    |    |           |    |    |         |    |    |           |    |    |         |       |    |                  |    |    |         |    |    |                    |    |    |         |
| 11                                                                                                                                                                               | COF-SQ <sup>c</sup>                                                                                                                                                                                                                                                                                                                                                                                                                                                                                                                                                                                                                                                                                                                                                                                                                                                                                                                                                                                                                                                                                                                                                                                                                                                                                                                                                                                                                                                                                                                                                                                                                                                                                                                                                                                                                                | 50        | 24       | Toluene                         | 64                     |         |                        |   |        |    |    |         |    |   |        |    |    |     |    |   |        |    |    |         |    |   |        |    |    |                                 |    |   |        |    |    |                   |    |   |        |    |    |      |    |   |        |    |    |      |    |   |        |    |    |                    |    |   |        |      |    |         |    |    |        |    |    |         |    |    |                     |    |    |         |    |    |           |    |    |         |    |    |           |    |    |         |       |    |                  |    |    |         |    |    |                    |    |    |         |
| 12                                                                                                                                                                               | Monomer 1                                                                                                                                                                                                                                                                                                                                                                                                                                                                                                                                                                                                                                                                                                                                                                                                                                                                                                                                                                                                                                                                                                                                                                                                                                                                                                                                                                                                                                                                                                                                                                                                                                                                                                                                                                                                                                          | 50        | 24       | Toluene                         | 35                     |         |                        |   |        |    |    |         |    |   |        |    |    |     |    |   |        |    |    |         |    |   |        |    |    |                                 |    |   |        |    |    |                   |    |   |        |    |    |      |    |   |        |    |    |      |    |   |        |    |    |                    |    |   |        |      |    |         |    |    |        |    |    |         |    |    |                     |    |    |         |    |    |           |    |    |         |    |    |           |    |    |         |       |    |                  |    |    |         |    |    |                    |    |    |         |
| 13                                                                                                                                                                               | Monomer 2                                                                                                                                                                                                                                                                                                                                                                                                                                                                                                                                                                                                                                                                                                                                                                                                                                                                                                                                                                                                                                                                                                                                                                                                                                                                                                                                                                                                                                                                                                                                                                                                                                                                                                                                                                                                                                          | 50        | 24       | Toluene                         | Trace                  |         |                        |   |        |    |    |         |    |   |        |    |    |     |    |   |        |    |    |         |    |   |        |    |    |                                 |    |   |        |    |    |                   |    |   |        |    |    |      |    |   |        |    |    |      |    |   |        |    |    |                    |    |   |        |      |    |         |    |    |        |    |    |         |    |    |                     |    |    |         |    |    |           |    |    |         |    |    |           |    |    |         |       |    |                  |    |    |         |    |    |                    |    |    |         |
| 14                                                                                                                                                                               | Model compound 4                                                                                                                                                                                                                                                                                                                                                                                                                                                                                                                                                                                                                                                                                                                                                                                                                                                                                                                                                                                                                                                                                                                                                                                                                                                                                                                                                                                                                                                                                                                                                                                                                                                                                                                                                                                                                                   | 50        | 24       | Toluene                         | 63                     |         |                        |   |        |    |    |         |    |   |        |    |    |     |    |   |        |    |    |         |    |   |        |    |    |                                 |    |   |        |    |    |                   |    |   |        |    |    |      |    |   |        |    |    |      |    |   |        |    |    |                    |    |   |        |      |    |         |    |    |        |    |    |         |    |    |                     |    |    |         |    |    |           |    |    |         |    |    |           |    |    |         |       |    |                  |    |    |         |    |    |                    |    |    |         |
| 15                                                                                                                                                                               | 2DP <sub>1+5</sub>                                                                                                                                                                                                                                                                                                                                                                                                                                                                                                                                                                                                                                                                                                                                                                                                                                                                                                                                                                                                                                                                                                                                                                                                                                                                                                                                                                                                                                                                                                                                                                                                                                                                                                                                                                                                                                 | 50        | 24       | Toluene                         | Trace                  |         |                        |   |        |    |    |         |    |   |        |    |    |     |    |   |        |    |    |         |    |   |        |    |    |                                 |    |   |        |    |    |                   |    |   |        |    |    |      |    |   |        |    |    |      |    |   |        |    |    |                    |    |   |        |      |    |         |    |    |        |    |    |         |    |    |                     |    |    |         |    |    |           |    |    |         |    |    |           |    |    |         |       |    |                  |    |    |         |    |    |                    |    |    |         |

As the ethynyl content increases, [HCRC]<sub>X</sub>-H<sub>2</sub>P-COFs exhibit a decrease in the BET SA of **1126, 1092, 859, 324, and 206 m<sup>2</sup>/g** as the ethynyl content increases from **0 to 25, 50, 75 and 100**, respectively, whereas their pore sizes decrease from **2.2 to 2.0, 1.9, 1.5, and 1.5 nm**. The [Pyr]<sub>25</sub>-H<sub>2</sub>P-COF has a surface area of **960 m<sup>2</sup>/g**, which decreases to **675, 86, and 63 m<sup>2</sup>/g** for [Pyr]<sub>50</sub>-H<sub>2</sub>P-COF, [Pyr]<sub>75</sub>-H<sub>2</sub>P-COF, and [Pyr]<sub>100</sub>-H<sub>2</sub>P-COF, respectively. Their pore sizes decrease from **1.9 to 1.6, 1.4, and 1.4 nm**, respectively. Reprinted with the permission from the Royal Society of Chemistry (reference S14).

| 15    | 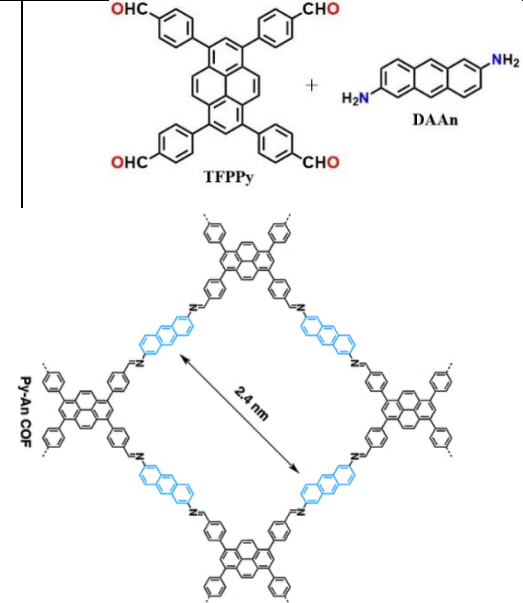 |  <p>R: phenyl, benzyl, p-bromophenyl, p-nitrophenyl, cyclohexyl, ethyl.<br/>Yield: 60-90%.</p> <p>Catalytic Diels-Alder reaction of 9-hydroxymethylanthracene and N-substituted maleimide using Py-An COF catalyst at 25°C, 1 bar.</p> <table border="1"> <thead> <tr> <th rowspan="2">Entry</th> <th rowspan="2">R</th> <th rowspan="2">Solvent</th> <th rowspan="2">Reaction time (h)</th> <th colspan="2">Yield (%)</th> </tr> <tr> <th>No COF</th> <th>With COF</th> </tr> </thead> <tbody> <tr><td>1</td><td>Phenyl</td><td>EtOH</td><td>6</td><td>24</td><td>&gt; 99</td></tr> <tr><td>2</td><td>Benzyl</td><td>EtOH</td><td>6</td><td>10</td><td>87</td></tr> <tr><td>3</td><td>p-Bromophenyl</td><td>EtOH</td><td>24</td><td>21</td><td>83</td></tr> <tr><td>4</td><td>p-Nitrophenyl</td><td>EtOH</td><td>24</td><td>5</td><td>50</td></tr> <tr><td>5</td><td>Cyclohexyl</td><td>EtOH</td><td>24</td><td>22</td><td>60</td></tr> <tr><td>6</td><td>Ethyl</td><td>EtOH</td><td>24</td><td>38</td><td>87</td></tr> <tr><td>7</td><td>Phenyl</td><td>Water</td><td>48</td><td>13</td><td>91</td></tr> </tbody> </table> | Entry  | R        | Solvent | Reaction time (h) | Yield (%)         |           | No COF | With COF | 1 | Phenyl | EtOH | 6 | 24 | > 99 | 2 | Benzyl | EtOH | 6 | 10 | 87 | 3 | p-Bromophenyl | EtOH | 24 | 21 | 83 | 4 | p-Nitrophenyl | EtOH | 24 | 5 | 50 | 5 | Cyclohexyl | EtOH | 24 | 22 | 60 | 6 | Ethyl | EtOH | 24 | 38 | 87 | 7 | Phenyl | Water | 48 | 13 | 91 | S15 |
|-------|------------------------------------------------------------------------------------|-----------------------------------------------------------------------------------------------------------------------------------------------------------------------------------------------------------------------------------------------------------------------------------------------------------------------------------------------------------------------------------------------------------------------------------------------------------------------------------------------------------------------------------------------------------------------------------------------------------------------------------------------------------------------------------------------------------------------------------------------------------------------------------------------------------------------------------------------------------------------------------------------------------------------------------------------------------------------------------------------------------------------------------------------------------------------------------------------------------------------------------------------------------------------------------------------------------------|--------|----------|---------|-------------------|-------------------|-----------|--------|----------|---|--------|------|---|----|------|---|--------|------|---|----|----|---|---------------|------|----|----|----|---|---------------|------|----|---|----|---|------------|------|----|----|----|---|-------|------|----|----|----|---|--------|-------|----|----|----|-----|
| Entry | R                                                                                  | Solvent                                                                                                                                                                                                                                                                                                                                                                                                                                                                                                                                                                                                                                                                                                                                                                                                                                                                                                                                                                                                                                                                                                                                                                                                         |        |          |         |                   | Reaction time (h) | Yield (%) |        |          |   |        |      |   |    |      |   |        |      |   |    |    |   |               |      |    |    |    |   |               |      |    |   |    |   |            |      |    |    |    |   |       |      |    |    |    |   |        |       |    |    |    |     |
|       |                                                                                    |                                                                                                                                                                                                                                                                                                                                                                                                                                                                                                                                                                                                                                                                                                                                                                                                                                                                                                                                                                                                                                                                                                                                                                                                                 | No COF | With COF |         |                   |                   |           |        |          |   |        |      |   |    |      |   |        |      |   |    |    |   |               |      |    |    |    |   |               |      |    |   |    |   |            |      |    |    |    |   |       |      |    |    |    |   |        |       |    |    |    |     |
| 1     | Phenyl                                                                             | EtOH                                                                                                                                                                                                                                                                                                                                                                                                                                                                                                                                                                                                                                                                                                                                                                                                                                                                                                                                                                                                                                                                                                                                                                                                            | 6      | 24       | > 99    |                   |                   |           |        |          |   |        |      |   |    |      |   |        |      |   |    |    |   |               |      |    |    |    |   |               |      |    |   |    |   |            |      |    |    |    |   |       |      |    |    |    |   |        |       |    |    |    |     |
| 2     | Benzyl                                                                             | EtOH                                                                                                                                                                                                                                                                                                                                                                                                                                                                                                                                                                                                                                                                                                                                                                                                                                                                                                                                                                                                                                                                                                                                                                                                            | 6      | 10       | 87      |                   |                   |           |        |          |   |        |      |   |    |      |   |        |      |   |    |    |   |               |      |    |    |    |   |               |      |    |   |    |   |            |      |    |    |    |   |       |      |    |    |    |   |        |       |    |    |    |     |
| 3     | p-Bromophenyl                                                                      | EtOH                                                                                                                                                                                                                                                                                                                                                                                                                                                                                                                                                                                                                                                                                                                                                                                                                                                                                                                                                                                                                                                                                                                                                                                                            | 24     | 21       | 83      |                   |                   |           |        |          |   |        |      |   |    |      |   |        |      |   |    |    |   |               |      |    |    |    |   |               |      |    |   |    |   |            |      |    |    |    |   |       |      |    |    |    |   |        |       |    |    |    |     |
| 4     | p-Nitrophenyl                                                                      | EtOH                                                                                                                                                                                                                                                                                                                                                                                                                                                                                                                                                                                                                                                                                                                                                                                                                                                                                                                                                                                                                                                                                                                                                                                                            | 24     | 5        | 50      |                   |                   |           |        |          |   |        |      |   |    |      |   |        |      |   |    |    |   |               |      |    |    |    |   |               |      |    |   |    |   |            |      |    |    |    |   |       |      |    |    |    |   |        |       |    |    |    |     |
| 5     | Cyclohexyl                                                                         | EtOH                                                                                                                                                                                                                                                                                                                                                                                                                                                                                                                                                                                                                                                                                                                                                                                                                                                                                                                                                                                                                                                                                                                                                                                                            | 24     | 22       | 60      |                   |                   |           |        |          |   |        |      |   |    |      |   |        |      |   |    |    |   |               |      |    |    |    |   |               |      |    |   |    |   |            |      |    |    |    |   |       |      |    |    |    |   |        |       |    |    |    |     |
| 6     | Ethyl                                                                              | EtOH                                                                                                                                                                                                                                                                                                                                                                                                                                                                                                                                                                                                                                                                                                                                                                                                                                                                                                                                                                                                                                                                                                                                                                                                            | 24     | 38       | 87      |                   |                   |           |        |          |   |        |      |   |    |      |   |        |      |   |    |    |   |               |      |    |    |    |   |               |      |    |   |    |   |            |      |    |    |    |   |       |      |    |    |    |   |        |       |    |    |    |     |
| 7     | Phenyl                                                                             | Water                                                                                                                                                                                                                                                                                                                                                                                                                                                                                                                                                                                                                                                                                                                                                                                                                                                                                                                                                                                                                                                                                                                                                                                                           | 48     | 13       | 91      |                   |                   |           |        |          |   |        |      |   |    |      |   |        |      |   |    |    |   |               |      |    |    |    |   |               |      |    |   |    |   |            |      |    |    |    |   |       |      |    |    |    |   |        |       |    |    |    |     |

Py-An COF: BET SA is **1479 m<sup>2</sup>/g** and pore size is **2.4 nm**. Pore volume = **0.7 cc/g**. Reprinted with the permission from the Royal Society of Chemistry (reference S15).

#### Phase-transfer Catalysis

|    |                                                                                     |                                                                                                                                                                                                                                                                                                                                                                                                     |     |
|----|-------------------------------------------------------------------------------------|-----------------------------------------------------------------------------------------------------------------------------------------------------------------------------------------------------------------------------------------------------------------------------------------------------------------------------------------------------------------------------------------------------|-----|
| 16 | 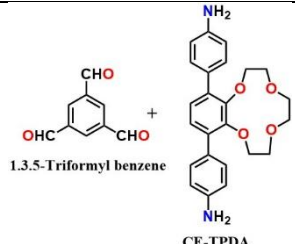 |  <p>Phase Transfer Catalytic Activity of 18C6-COF<sup>†</sup> in the Iodination of 1-bromooctane under Solid-Liquid-Solid Condition. When solvents are THF and EtOAc, yield = 96%.</p> <p>Different nucleophilic substitution using different nucleophiles and the 18C6-COF as the phase transfer catalyst.</p> | S16 |
|----|-------------------------------------------------------------------------------------|-----------------------------------------------------------------------------------------------------------------------------------------------------------------------------------------------------------------------------------------------------------------------------------------------------------------------------------------------------------------------------------------------------|-----|

| 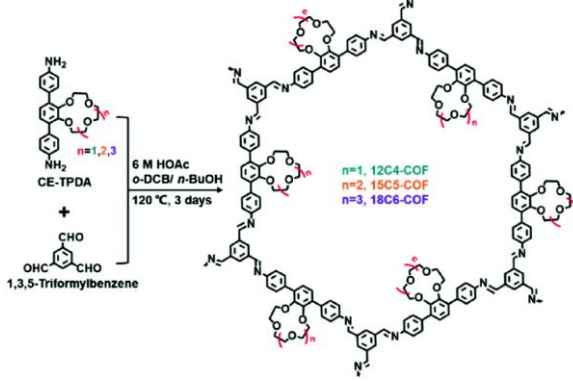 <p> <math>n=1,2,3</math><br/>         CE-TPDA<br/>         +<br/> <math>\text{CHO}</math><br/>         1,3,5-Triformylbenzene<br/> <math>\xrightarrow[120\text{ }^\circ\text{C, 3 days}]{6\text{ M HOAc, o-DCB/ n-BuOH}}</math><br/> <math>n=1, 12\text{C}4\text{-COF}</math><br/> <math>n=2, 15\text{C}5\text{-COF}</math><br/> <math>n=3, 18\text{C}6\text{-COF}</math> </p> | <p style="text-align: center;"><b>R-X + Nu<sup>-</sup> <math>\xrightarrow[\text{Solv. reflux}]{10\% \text{ mol } 18\text{C}6\text{-COF}}</math> RNu + X<sup>-</sup></b></p> <table border="1"> <thead> <tr> <th>Entry</th> <th>RX</th> <th>Nu<sup>-</sup></th> <th>Solvent</th> <th>T(°C)/t(h)</th> <th>Yield (%)<sup>[b]</sup><br/>/Controlled<br/>yield(%)<sup>[c]</sup></th> </tr> </thead> <tbody> <tr><td>1</td><td><i>n</i>-C<sub>6</sub>H<sub>5</sub>Br</td><td>CH<sub>3</sub>COOK</td><td>CH<sub>3</sub>CN</td><td>85/5</td><td>85/27</td></tr> <tr><td>2</td><td><i>n</i>-C<sub>8</sub>H<sub>17</sub>Br</td><td>CH<sub>3</sub>COOK</td><td>CH<sub>3</sub>CN</td><td>85/5</td><td>91/26</td></tr> <tr><td>3</td><td>PhCH<sub>2</sub>Br</td><td>CH<sub>3</sub>COOK</td><td>CH<sub>3</sub>CN</td><td>85/5</td><td>99/34</td></tr> <tr><td>4</td><td>PhCH<sub>2</sub>Cl</td><td>CH<sub>3</sub>COOK</td><td>CH<sub>3</sub>CN</td><td>85/5</td><td>81/23</td></tr> <tr><td>5<sup>[d]</sup></td><td>PhCH<sub>2</sub>Br</td><td>PhCOOK</td><td>NB/H<sub>2</sub>O</td><td>100/10</td><td>96/25</td></tr> <tr><td>6</td><td>PhCH<sub>2</sub>Br</td><td>KSCN</td><td>CH<sub>3</sub>CN</td><td>85/1</td><td>99/31</td></tr> <tr><td>7</td><td>PhCH<sub>2</sub>Br</td><td>PhOK</td><td>CH<sub>3</sub>CN</td><td>85/5</td><td>94/23</td></tr> <tr><td>8</td><td>PhCH<sub>2</sub>Br</td><td>NaN<sub>3</sub></td><td>CH<sub>3</sub>CN</td><td>85/5</td><td>97/36</td></tr> <tr><td>9</td><td>PhCH<sub>2</sub>Br</td><td>KCN</td><td>CH<sub>3</sub>CN</td><td>85/10</td><td>82/N.D.<sup>[e]</sup></td></tr> <tr><td>10</td><td>PhCH<sub>2</sub>Br</td><td>KF</td><td>CH<sub>3</sub>CN</td><td>85/10</td><td>84/N.D.</td></tr> <tr><td>11</td><td></td><td>KF</td><td>CH<sub>3</sub>CN</td><td>85/24</td><td>47/N.D.</td></tr> <tr><td>12</td><td></td><td>KF</td><td>DMF</td><td>100/10</td><td>86/32</td></tr> </tbody> </table> <p>           a Unless otherwise noted, the reaction conditions are: halides (0.25 mmol), nucleophile (1.25 mmol), and 18C6-COF (10 mol %, 14 mg), 2 mL solvent, GC-MS determined the structure. b GC yield. c Controlled experiment in the absence of catalyst. d 1.25 mmol PhCOOH + 1.5 mmol KOH in 1.5 mL H<sub>2</sub>O and PhCH<sub>2</sub>Br in 0.5 mL nitrobenzene (NB). e N.D. = not detected the product.         </p> | Entry                | RX                  | Nu <sup>-</sup> | Solvent                                                            | T(°C)/t(h) | Yield (%) <sup>[b]</sup><br>/Controlled<br>yield(%) <sup>[c]</sup> | 1 | <i>n</i> -C <sub>6</sub> H <sub>5</sub> Br | CH <sub>3</sub> COOK | CH <sub>3</sub> CN | 85/5 | 85/27 | 2 | <i>n</i> -C <sub>8</sub> H <sub>17</sub> Br | CH <sub>3</sub> COOK | CH <sub>3</sub> CN | 85/5 | 91/26 | 3 | PhCH <sub>2</sub> Br | CH <sub>3</sub> COOK | CH <sub>3</sub> CN | 85/5 | 99/34 | 4 | PhCH <sub>2</sub> Cl | CH <sub>3</sub> COOK | CH <sub>3</sub> CN | 85/5 | 81/23 | 5 <sup>[d]</sup> | PhCH <sub>2</sub> Br | PhCOOK | NB/H <sub>2</sub> O | 100/10 | 96/25 | 6 | PhCH <sub>2</sub> Br | KSCN | CH <sub>3</sub> CN | 85/1 | 99/31 | 7 | PhCH <sub>2</sub> Br | PhOK | CH <sub>3</sub> CN | 85/5 | 94/23 | 8 | PhCH <sub>2</sub> Br | NaN <sub>3</sub> | CH <sub>3</sub> CN | 85/5 | 97/36 | 9 | PhCH <sub>2</sub> Br | KCN | CH <sub>3</sub> CN | 85/10 | 82/N.D. <sup>[e]</sup> | 10 | PhCH <sub>2</sub> Br | KF | CH <sub>3</sub> CN | 85/10 | 84/N.D. | 11 |  | KF | CH <sub>3</sub> CN | 85/24 | 47/N.D. | 12 |  | KF | DMF | 100/10 | 86/32 |
|------------------------------------------------------------------------------------------------------------------------------------------------------------------------------------------------------------------------------------------------------------------------------------------------------------------------------------------------------------------------------------------------------------------------------------------------------------------|-----------------------------------------------------------------------------------------------------------------------------------------------------------------------------------------------------------------------------------------------------------------------------------------------------------------------------------------------------------------------------------------------------------------------------------------------------------------------------------------------------------------------------------------------------------------------------------------------------------------------------------------------------------------------------------------------------------------------------------------------------------------------------------------------------------------------------------------------------------------------------------------------------------------------------------------------------------------------------------------------------------------------------------------------------------------------------------------------------------------------------------------------------------------------------------------------------------------------------------------------------------------------------------------------------------------------------------------------------------------------------------------------------------------------------------------------------------------------------------------------------------------------------------------------------------------------------------------------------------------------------------------------------------------------------------------------------------------------------------------------------------------------------------------------------------------------------------------------------------------------------------------------------------------------------------------------------------------------------------------------------------------------------------------------------------------------------------------------------------------------------------------------------------------------------------------------------------------------------------------------------------------------------------------------------------------------------------------------------------------------------------------------------------------------------------------------------------------------------------------------------------------------------|----------------------|---------------------|-----------------|--------------------------------------------------------------------|------------|--------------------------------------------------------------------|---|--------------------------------------------|----------------------|--------------------|------|-------|---|---------------------------------------------|----------------------|--------------------|------|-------|---|----------------------|----------------------|--------------------|------|-------|---|----------------------|----------------------|--------------------|------|-------|------------------|----------------------|--------|---------------------|--------|-------|---|----------------------|------|--------------------|------|-------|---|----------------------|------|--------------------|------|-------|---|----------------------|------------------|--------------------|------|-------|---|----------------------|-----|--------------------|-------|------------------------|----|----------------------|----|--------------------|-------|---------|----|-----------------------------------------------------------------------------------|----|--------------------|-------|---------|----|-----------------------------------------------------------------------------------|----|-----|--------|-------|
| Entry                                                                                                                                                                                                                                                                                                                                                                                                                                                            | RX                                                                                                                                                                                                                                                                                                                                                                                                                                                                                                                                                                                                                                                                                                                                                                                                                                                                                                                                                                                                                                                                                                                                                                                                                                                                                                                                                                                                                                                                                                                                                                                                                                                                                                                                                                                                                                                                                                                                                                                                                                                                                                                                                                                                                                                                                                                                                                                                                                                                                                                          | Nu <sup>-</sup>      | Solvent             | T(°C)/t(h)      | Yield (%) <sup>[b]</sup><br>/Controlled<br>yield(%) <sup>[c]</sup> |            |                                                                    |   |                                            |                      |                    |      |       |   |                                             |                      |                    |      |       |   |                      |                      |                    |      |       |   |                      |                      |                    |      |       |                  |                      |        |                     |        |       |   |                      |      |                    |      |       |   |                      |      |                    |      |       |   |                      |                  |                    |      |       |   |                      |     |                    |       |                        |    |                      |    |                    |       |         |    |                                                                                   |    |                    |       |         |    |                                                                                   |    |     |        |       |
| 1                                                                                                                                                                                                                                                                                                                                                                                                                                                                | <i>n</i> -C <sub>6</sub> H <sub>5</sub> Br                                                                                                                                                                                                                                                                                                                                                                                                                                                                                                                                                                                                                                                                                                                                                                                                                                                                                                                                                                                                                                                                                                                                                                                                                                                                                                                                                                                                                                                                                                                                                                                                                                                                                                                                                                                                                                                                                                                                                                                                                                                                                                                                                                                                                                                                                                                                                                                                                                                                                  | CH <sub>3</sub> COOK | CH <sub>3</sub> CN  | 85/5            | 85/27                                                              |            |                                                                    |   |                                            |                      |                    |      |       |   |                                             |                      |                    |      |       |   |                      |                      |                    |      |       |   |                      |                      |                    |      |       |                  |                      |        |                     |        |       |   |                      |      |                    |      |       |   |                      |      |                    |      |       |   |                      |                  |                    |      |       |   |                      |     |                    |       |                        |    |                      |    |                    |       |         |    |                                                                                   |    |                    |       |         |    |                                                                                   |    |     |        |       |
| 2                                                                                                                                                                                                                                                                                                                                                                                                                                                                | <i>n</i> -C <sub>8</sub> H <sub>17</sub> Br                                                                                                                                                                                                                                                                                                                                                                                                                                                                                                                                                                                                                                                                                                                                                                                                                                                                                                                                                                                                                                                                                                                                                                                                                                                                                                                                                                                                                                                                                                                                                                                                                                                                                                                                                                                                                                                                                                                                                                                                                                                                                                                                                                                                                                                                                                                                                                                                                                                                                 | CH <sub>3</sub> COOK | CH <sub>3</sub> CN  | 85/5            | 91/26                                                              |            |                                                                    |   |                                            |                      |                    |      |       |   |                                             |                      |                    |      |       |   |                      |                      |                    |      |       |   |                      |                      |                    |      |       |                  |                      |        |                     |        |       |   |                      |      |                    |      |       |   |                      |      |                    |      |       |   |                      |                  |                    |      |       |   |                      |     |                    |       |                        |    |                      |    |                    |       |         |    |                                                                                   |    |                    |       |         |    |                                                                                   |    |     |        |       |
| 3                                                                                                                                                                                                                                                                                                                                                                                                                                                                | PhCH <sub>2</sub> Br                                                                                                                                                                                                                                                                                                                                                                                                                                                                                                                                                                                                                                                                                                                                                                                                                                                                                                                                                                                                                                                                                                                                                                                                                                                                                                                                                                                                                                                                                                                                                                                                                                                                                                                                                                                                                                                                                                                                                                                                                                                                                                                                                                                                                                                                                                                                                                                                                                                                                                        | CH <sub>3</sub> COOK | CH <sub>3</sub> CN  | 85/5            | 99/34                                                              |            |                                                                    |   |                                            |                      |                    |      |       |   |                                             |                      |                    |      |       |   |                      |                      |                    |      |       |   |                      |                      |                    |      |       |                  |                      |        |                     |        |       |   |                      |      |                    |      |       |   |                      |      |                    |      |       |   |                      |                  |                    |      |       |   |                      |     |                    |       |                        |    |                      |    |                    |       |         |    |                                                                                   |    |                    |       |         |    |                                                                                   |    |     |        |       |
| 4                                                                                                                                                                                                                                                                                                                                                                                                                                                                | PhCH <sub>2</sub> Cl                                                                                                                                                                                                                                                                                                                                                                                                                                                                                                                                                                                                                                                                                                                                                                                                                                                                                                                                                                                                                                                                                                                                                                                                                                                                                                                                                                                                                                                                                                                                                                                                                                                                                                                                                                                                                                                                                                                                                                                                                                                                                                                                                                                                                                                                                                                                                                                                                                                                                                        | CH <sub>3</sub> COOK | CH <sub>3</sub> CN  | 85/5            | 81/23                                                              |            |                                                                    |   |                                            |                      |                    |      |       |   |                                             |                      |                    |      |       |   |                      |                      |                    |      |       |   |                      |                      |                    |      |       |                  |                      |        |                     |        |       |   |                      |      |                    |      |       |   |                      |      |                    |      |       |   |                      |                  |                    |      |       |   |                      |     |                    |       |                        |    |                      |    |                    |       |         |    |                                                                                   |    |                    |       |         |    |                                                                                   |    |     |        |       |
| 5 <sup>[d]</sup>                                                                                                                                                                                                                                                                                                                                                                                                                                                 | PhCH <sub>2</sub> Br                                                                                                                                                                                                                                                                                                                                                                                                                                                                                                                                                                                                                                                                                                                                                                                                                                                                                                                                                                                                                                                                                                                                                                                                                                                                                                                                                                                                                                                                                                                                                                                                                                                                                                                                                                                                                                                                                                                                                                                                                                                                                                                                                                                                                                                                                                                                                                                                                                                                                                        | PhCOOK               | NB/H <sub>2</sub> O | 100/10          | 96/25                                                              |            |                                                                    |   |                                            |                      |                    |      |       |   |                                             |                      |                    |      |       |   |                      |                      |                    |      |       |   |                      |                      |                    |      |       |                  |                      |        |                     |        |       |   |                      |      |                    |      |       |   |                      |      |                    |      |       |   |                      |                  |                    |      |       |   |                      |     |                    |       |                        |    |                      |    |                    |       |         |    |                                                                                   |    |                    |       |         |    |                                                                                   |    |     |        |       |
| 6                                                                                                                                                                                                                                                                                                                                                                                                                                                                | PhCH <sub>2</sub> Br                                                                                                                                                                                                                                                                                                                                                                                                                                                                                                                                                                                                                                                                                                                                                                                                                                                                                                                                                                                                                                                                                                                                                                                                                                                                                                                                                                                                                                                                                                                                                                                                                                                                                                                                                                                                                                                                                                                                                                                                                                                                                                                                                                                                                                                                                                                                                                                                                                                                                                        | KSCN                 | CH <sub>3</sub> CN  | 85/1            | 99/31                                                              |            |                                                                    |   |                                            |                      |                    |      |       |   |                                             |                      |                    |      |       |   |                      |                      |                    |      |       |   |                      |                      |                    |      |       |                  |                      |        |                     |        |       |   |                      |      |                    |      |       |   |                      |      |                    |      |       |   |                      |                  |                    |      |       |   |                      |     |                    |       |                        |    |                      |    |                    |       |         |    |                                                                                   |    |                    |       |         |    |                                                                                   |    |     |        |       |
| 7                                                                                                                                                                                                                                                                                                                                                                                                                                                                | PhCH <sub>2</sub> Br                                                                                                                                                                                                                                                                                                                                                                                                                                                                                                                                                                                                                                                                                                                                                                                                                                                                                                                                                                                                                                                                                                                                                                                                                                                                                                                                                                                                                                                                                                                                                                                                                                                                                                                                                                                                                                                                                                                                                                                                                                                                                                                                                                                                                                                                                                                                                                                                                                                                                                        | PhOK                 | CH <sub>3</sub> CN  | 85/5            | 94/23                                                              |            |                                                                    |   |                                            |                      |                    |      |       |   |                                             |                      |                    |      |       |   |                      |                      |                    |      |       |   |                      |                      |                    |      |       |                  |                      |        |                     |        |       |   |                      |      |                    |      |       |   |                      |      |                    |      |       |   |                      |                  |                    |      |       |   |                      |     |                    |       |                        |    |                      |    |                    |       |         |    |                                                                                   |    |                    |       |         |    |                                                                                   |    |     |        |       |
| 8                                                                                                                                                                                                                                                                                                                                                                                                                                                                | PhCH <sub>2</sub> Br                                                                                                                                                                                                                                                                                                                                                                                                                                                                                                                                                                                                                                                                                                                                                                                                                                                                                                                                                                                                                                                                                                                                                                                                                                                                                                                                                                                                                                                                                                                                                                                                                                                                                                                                                                                                                                                                                                                                                                                                                                                                                                                                                                                                                                                                                                                                                                                                                                                                                                        | NaN <sub>3</sub>     | CH <sub>3</sub> CN  | 85/5            | 97/36                                                              |            |                                                                    |   |                                            |                      |                    |      |       |   |                                             |                      |                    |      |       |   |                      |                      |                    |      |       |   |                      |                      |                    |      |       |                  |                      |        |                     |        |       |   |                      |      |                    |      |       |   |                      |      |                    |      |       |   |                      |                  |                    |      |       |   |                      |     |                    |       |                        |    |                      |    |                    |       |         |    |                                                                                   |    |                    |       |         |    |                                                                                   |    |     |        |       |
| 9                                                                                                                                                                                                                                                                                                                                                                                                                                                                | PhCH <sub>2</sub> Br                                                                                                                                                                                                                                                                                                                                                                                                                                                                                                                                                                                                                                                                                                                                                                                                                                                                                                                                                                                                                                                                                                                                                                                                                                                                                                                                                                                                                                                                                                                                                                                                                                                                                                                                                                                                                                                                                                                                                                                                                                                                                                                                                                                                                                                                                                                                                                                                                                                                                                        | KCN                  | CH <sub>3</sub> CN  | 85/10           | 82/N.D. <sup>[e]</sup>                                             |            |                                                                    |   |                                            |                      |                    |      |       |   |                                             |                      |                    |      |       |   |                      |                      |                    |      |       |   |                      |                      |                    |      |       |                  |                      |        |                     |        |       |   |                      |      |                    |      |       |   |                      |      |                    |      |       |   |                      |                  |                    |      |       |   |                      |     |                    |       |                        |    |                      |    |                    |       |         |    |                                                                                   |    |                    |       |         |    |                                                                                   |    |     |        |       |
| 10                                                                                                                                                                                                                                                                                                                                                                                                                                                               | PhCH <sub>2</sub> Br                                                                                                                                                                                                                                                                                                                                                                                                                                                                                                                                                                                                                                                                                                                                                                                                                                                                                                                                                                                                                                                                                                                                                                                                                                                                                                                                                                                                                                                                                                                                                                                                                                                                                                                                                                                                                                                                                                                                                                                                                                                                                                                                                                                                                                                                                                                                                                                                                                                                                                        | KF                   | CH <sub>3</sub> CN  | 85/10           | 84/N.D.                                                            |            |                                                                    |   |                                            |                      |                    |      |       |   |                                             |                      |                    |      |       |   |                      |                      |                    |      |       |   |                      |                      |                    |      |       |                  |                      |        |                     |        |       |   |                      |      |                    |      |       |   |                      |      |                    |      |       |   |                      |                  |                    |      |       |   |                      |     |                    |       |                        |    |                      |    |                    |       |         |    |                                                                                   |    |                    |       |         |    |                                                                                   |    |     |        |       |
| 11                                                                                                                                                                                                                                                                                                                                                                                                                                                               |                                                                                                                                                                                                                                                                                                                                                                                                                                                                                                                                                                                                                                                                                                                                                                                                                                                                                                                                                                                                                                                                                                                                                                                                                                                                                                                                                                                                                                                                                                                                                                                                                                                                                                                                                                                                                                                                                                                                                                                                                                                                                                                                                                                                                                                                                                                                                                                                                                            | KF                   | CH <sub>3</sub> CN  | 85/24           | 47/N.D.                                                            |            |                                                                    |   |                                            |                      |                    |      |       |   |                                             |                      |                    |      |       |   |                      |                      |                    |      |       |   |                      |                      |                    |      |       |                  |                      |        |                     |        |       |   |                      |      |                    |      |       |   |                      |      |                    |      |       |   |                      |                  |                    |      |       |   |                      |     |                    |       |                        |    |                      |    |                    |       |         |    |                                                                                   |    |                    |       |         |    |                                                                                   |    |     |        |       |
| 12                                                                                                                                                                                                                                                                                                                                                                                                                                                               |                                                                                                                                                                                                                                                                                                                                                                                                                                                                                                                                                                                                                                                                                                                                                                                                                                                                                                                                                                                                                                                                                                                                                                                                                                                                                                                                                                                                                                                                                                                                                                                                                                                                                                                                                                                                                                                                                                                                                                                                                                                                                                                                                                                                                                                                                                                                                                                                                                            | KF                   | DMF                 | 100/10          | 86/32                                                              |            |                                                                    |   |                                            |                      |                    |      |       |   |                                             |                      |                    |      |       |   |                      |                      |                    |      |       |   |                      |                      |                    |      |       |                  |                      |        |                     |        |       |   |                      |      |                    |      |       |   |                      |      |                    |      |       |   |                      |                  |                    |      |       |   |                      |     |                    |       |                        |    |                      |    |                    |       |         |    |                                                                                   |    |                    |       |         |    |                                                                                   |    |     |        |       |
| <p>Crown ether decorated COFs. BET surface areas of the 12C4-COF, 15C5-COF and 18C6-COF are <b>210</b>, <b>59</b> and <b>47 m<sup>2</sup>/g</b>. The pore size for the COFs are around <b>3.2 nm</b>. Reprinted with the permission from the Royal Society of Chemistry (reference S16).</p>                                                                                                                                                                     |                                                                                                                                                                                                                                                                                                                                                                                                                                                                                                                                                                                                                                                                                                                                                                                                                                                                                                                                                                                                                                                                                                                                                                                                                                                                                                                                                                                                                                                                                                                                                                                                                                                                                                                                                                                                                                                                                                                                                                                                                                                                                                                                                                                                                                                                                                                                                                                                                                                                                                                             |                      |                     |                 |                                                                    |            |                                                                    |   |                                            |                      |                    |      |       |   |                                             |                      |                    |      |       |   |                      |                      |                    |      |       |   |                      |                      |                    |      |       |                  |                      |        |                     |        |       |   |                      |      |                    |      |       |   |                      |      |                    |      |       |   |                      |                  |                    |      |       |   |                      |     |                    |       |                        |    |                      |    |                    |       |         |    |                                                                                   |    |                    |       |         |    |                                                                                   |    |     |        |       |

**Table S2: Non-noble metal-based COF catalysts.**

| No. | Structure and code of the COF and Notable properties                                                                                                                                                                   | Catalysed Organic Reaction                                                                                                                                                                                                                                                                                                                                                                                                                                                                                                                                                                                                                                                                                                                                                                                                                                                                                                                                                                                                                                                                                                                                                                                                                                                                                                                                         | Ref.      |           |                         |                          |                          |   |  |  |     |    |   |  |  |    |     |   |  |  |    |    |   |  |  |    |    |   |  |  |    |     |   |  |  |    |     |   |  |  |   |     |     |
|-----|------------------------------------------------------------------------------------------------------------------------------------------------------------------------------------------------------------------------|--------------------------------------------------------------------------------------------------------------------------------------------------------------------------------------------------------------------------------------------------------------------------------------------------------------------------------------------------------------------------------------------------------------------------------------------------------------------------------------------------------------------------------------------------------------------------------------------------------------------------------------------------------------------------------------------------------------------------------------------------------------------------------------------------------------------------------------------------------------------------------------------------------------------------------------------------------------------------------------------------------------------------------------------------------------------------------------------------------------------------------------------------------------------------------------------------------------------------------------------------------------------------------------------------------------------------------------------------------------------|-----------|-----------|-------------------------|--------------------------|--------------------------|---|--|--|-----|----|---|--|--|----|-----|---|--|--|----|----|---|--|--|----|----|---|--|--|----|-----|---|--|--|----|-----|---|--|--|---|-----|-----|
| 1   | 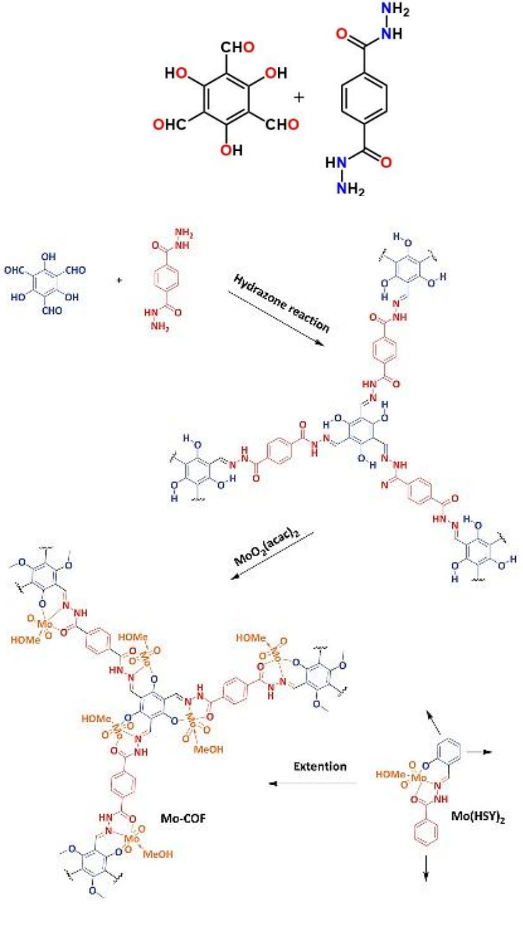 <p>Hydrazone reaction</p> <p><math>\text{MoO}_3(\text{acac})_2</math></p> <p>Extension</p> <p>Mo-COF</p> <p>Mo(HSV)<sub>2</sub></p> | <p style="text-align: center;"><b>Oxidation Reaction</b></p> <div style="text-align: center;">  <p>Epoxidation of alkenes.</p> <p>Scope of the Mo-COF catalysed epoxidation of alkenes.<sup>a</sup></p> <table border="1" data-bbox="857 493 1474 997"> <thead> <tr> <th>Entry</th> <th>Substrate</th> <th>Product</th> <th>Conversion<sup>b</sup></th> <th>Selectivity<sup>c</sup></th> </tr> </thead> <tbody> <tr> <td>1</td> <td></td> <td></td> <td>&gt;99</td> <td>71</td> </tr> <tr> <td>2</td> <td></td> <td></td> <td>80</td> <td>&gt;99</td> </tr> <tr> <td>3</td> <td></td> <td></td> <td>71</td> <td>80</td> </tr> <tr> <td>4</td> <td></td> <td></td> <td>62</td> <td>86</td> </tr> <tr> <td>5</td> <td></td> <td></td> <td>42</td> <td>&gt;99</td> </tr> <tr> <td>6</td> <td></td> <td></td> <td>20</td> <td>&gt;99</td> </tr> <tr> <td>7</td> <td></td> <td></td> <td>5</td> <td>&gt;99</td> </tr> </tbody> </table> <p><sup>a</sup>Olefin (1.0 mmol), TBHP (2.0 mmol), catalyst (0.01 mmol), 1,2-dichloroethane (2.0 mL) and bromobenzene (50 mg) as an internal standard sealed in a Teflon-lined screwcap vial were stirred at 80 °C for 6 h. <sup>b</sup> Conversion (%). <sup>c</sup> Selectivity (%) were determined by GC using an SE-54 column.</p> </div> | Entry     | Substrate | Product                 | Conversion <sup>b</sup>  | Selectivity <sup>c</sup> | 1 |  |  | >99 | 71 | 2 |  |  | 80 | >99 | 3 |  |  | 71 | 80 | 4 |  |  | 62 | 86 | 5 |  |  | 42 | >99 | 6 |  |  | 20 | >99 | 7 |  |  | 5 | >99 | S17 |
|     |                                                                                                                                                                                                                        | Entry                                                                                                                                                                                                                                                                                                                                                                                                                                                                                                                                                                                                                                                                                                                                                                                                                                                                                                                                                                                                                                                                                                                                                                                                                                                                                                                                                              | Substrate | Product   | Conversion <sup>b</sup> | Selectivity <sup>c</sup> |                          |   |  |  |     |    |   |  |  |    |     |   |  |  |    |    |   |  |  |    |    |   |  |  |    |     |   |  |  |    |     |   |  |  |   |     |     |
| 1   |                                                                                                                                                                                                                        |                                                                                                                                                                                                                                                                                                                                                                                                                                                                                                                                                                                                                                                                                                                                                                                                                                                                                                                                                                                                                                                                                                                                                                                                                                                                                                                                                                    | >99       | 71        |                         |                          |                          |   |  |  |     |    |   |  |  |    |     |   |  |  |    |    |   |  |  |    |    |   |  |  |    |     |   |  |  |    |     |   |  |  |   |     |     |
| 2   |                                                                                                                                                                                                                        |                                                                                                                                                                                                                                                                                                                                                                                                                                                                                                                                                                                                                                                                                                                                                                                                                                                                                                                                                                                                                                                                                                                                                                                                                                                                                                                                                                    | 80        | >99       |                         |                          |                          |   |  |  |     |    |   |  |  |    |     |   |  |  |    |    |   |  |  |    |    |   |  |  |    |     |   |  |  |    |     |   |  |  |   |     |     |
| 3   |                                                                                                                                                                                                                        |                                                                                                                                                                                                                                                                                                                                                                                                                                                                                                                                                                                                                                                                                                                                                                                                                                                                                                                                                                                                                                                                                                                                                                                                                                                                                                                                                                    | 71        | 80        |                         |                          |                          |   |  |  |     |    |   |  |  |    |     |   |  |  |    |    |   |  |  |    |    |   |  |  |    |     |   |  |  |    |     |   |  |  |   |     |     |
| 4   |                                                                                                                                                                                                                        |                                                                                                                                                                                                                                                                                                                                                                                                                                                                                                                                                                                                                                                                                                                                                                                                                                                                                                                                                                                                                                                                                                                                                                                                                                                                                                                                                                    | 62        | 86        |                         |                          |                          |   |  |  |     |    |   |  |  |    |     |   |  |  |    |    |   |  |  |    |    |   |  |  |    |     |   |  |  |    |     |   |  |  |   |     |     |
| 5   |                                                                                                                                                                                                                        |                                                                                                                                                                                                                                                                                                                                                                                                                                                                                                                                                                                                                                                                                                                                                                                                                                                                                                                                                                                                                                                                                                                                                                                                                                                                                                                                                                    | 42        | >99       |                         |                          |                          |   |  |  |     |    |   |  |  |    |     |   |  |  |    |    |   |  |  |    |    |   |  |  |    |     |   |  |  |    |     |   |  |  |   |     |     |
| 6   |                                                                                                                                                                                                                        |                                                                                                                                                                                                                                                                                                                                                                                                                                                                                                                                                                                                                                                                                                                                                                                                                                                                                                                                                                                                                                                                                                                                                                                                                                                                                                                                                                    | 20        | >99       |                         |                          |                          |   |  |  |     |    |   |  |  |    |     |   |  |  |    |    |   |  |  |    |    |   |  |  |    |     |   |  |  |    |     |   |  |  |   |     |     |
| 7   |                                                                                                                                                                                                                        |                                                                                                                                                                                                                                                                                                                                                                                                                                                                                                                                                                                                                                                                                                                                                                                                                                                                                                                                                                                                                                                                                                                                                                                                                                                                                                                                                                    | 5         | >99       |                         |                          |                          |   |  |  |     |    |   |  |  |    |     |   |  |  |    |    |   |  |  |    |    |   |  |  |    |     |   |  |  |    |     |   |  |  |   |     |     |
| 2   |  <p>TAPT</p> <p>DHTA</p> <p>TAPT-DHTA-COF</p> <p>Cu-COF</p> <p>TAPT-DHTA-COF</p> <p><math>\text{Cu}(\text{OAc})_2</math></p>        | <p>Selective oxidation of styrene.</p> <div style="text-align: center;">  </div>                                                                                                                                                                                                                                                                                                                                                                                                                                                                                                                                                                                                                                                                                                                                                                                                                                                                                                                                                                                                                                                                                                                                                                                               | S18       |           |                         |                          |                          |   |  |  |     |    |   |  |  |    |     |   |  |  |    |    |   |  |  |    |    |   |  |  |    |     |   |  |  |    |     |   |  |  |   |     |     |

BET surface areas of COF and Mo-COF are **244** and **63 m<sup>2</sup>/g**. ICP-MS estimates the Mo contain to be **2 mmol/g**. Active metal: **Mo(VI)**. Reprinted with the permission from the Royal Society of Chemistry (reference S17).

| Entry          | Substrate | Product | Conversion (%) | Yield (%) <sup>b</sup> | TOF (h <sup>-1</sup> ) <sup>c</sup> |
|----------------|-----------|---------|----------------|------------------------|-------------------------------------|
| 1 <sup>d</sup> |           |         | 76.13±0.20     | 58.01±0.14             | 19.77                               |
| 2 <sup>d</sup> |           |         | 98.77±0.10     | 93.01±0.09             | 25.65                               |
| 3 <sup>d</sup> |           |         | 74.56±0.10     | 17.92±0.02             | 19.36                               |
| 4 <sup>d</sup> |           |         | 44.87±0.20     | 39.88±0.18             | 11.65                               |
| 5 <sup>e</sup> |           |         | 21.55±0.20     | 10.51±0.10             | 5.60                                |

Two methods are employed to synthesize the COF, reflux in DMF (TAPT-DHTA-COF<sub>DMF</sub>) and solvothermal condition (TAPT-DHTA-COF<sub>HX</sub>). The surface areas for the COF<sub>DMF</sub> and COF<sub>HX</sub> are **660** and **2238 m<sup>2</sup>/g**. Cu(OAc)<sub>2</sub> is dissolved in methanol and then the COF is dispersed in the solution. The surface areas are reduced to **336** and **1886 m<sup>2</sup>/g** for COF<sub>DMF</sub> and COF<sub>HX</sub> respectively. Active metal: **Cu(II)**. Reprinted with the permission from the American Chemical Society (reference S18).

| 3    |           | Selective aerobic epoxidation of olefins<br><br>R1: Ph, cyclohexane, cyclopentane, cyclooctane etc. R2: H, RT, O <sub>2</sub> atm. | S19       |             |
|------|-----------|------------------------------------------------------------------------------------------------------------------------------------|-----------|-------------|
| Ent. | Substrate | Product                                                                                                                            | Conv. (%) | Select. (%) |
| 1    |           |                                                                                                                                    | > 99      | 93          |
| 2    |           |                                                                                                                                    | 78        | > 99        |
| 3    |           |                                                                                                                                    | 90        | > 99        |
| 4    |           |                                                                                                                                    | 79        | > 99        |
| 5    |           |                                                                                                                                    | 59        | > 99        |
| 6    |           |                                                                                                                                    | 29        | > 99        |
| 7    |           |                                                                                                                                    | 21        | > 99        |

The BET surface area of CPF-2 is **660 m<sup>2</sup>/g** and pore size are **1.55 nm**. The BET surface areas of Co-CPF-2 and Mn-CPF-2 are **475** and **454 m<sup>2</sup>/g**. ICP-MS: Co-CPF-2 and Mn-CPF-2 contain **4.71 Co** and **4.03 wt%** Mn ions, respectively. Active species: **Co(II)** and **Mn(II)**. Reprinted with the permission from the Elsevier (reference S19).

| 4 |  | Epoxidation of cyclooctene with H <sub>2</sub> O <sub>2</sub> :<br><br> | S20 |
|---|--|-------------------------------------------------------------------------|-----|
|---|--|-------------------------------------------------------------------------|-----|



|                                                                                          | <table border="1"> <thead> <tr> <th>Substrate</th> <th>Catalyst</th> <th>Con. (%)</th> <th>Selectivity (%)</th> </tr> </thead> <tbody> <tr> <td rowspan="6"> </td> <td>PMA@COF-LZU1</td> <td>49</td> <td></td> </tr> <tr> <td>Fe/PMA@COF-LZU1</td> <td>69</td> <td></td> </tr> <tr> <td>PMA@CIN-1</td> <td>83</td> <td>≥99</td> </tr> <tr> <td>Fe/PMA@CIN-1</td> <td>88</td> <td>≥99</td> </tr> <tr> <td>PMA@COF-300</td> <td>52</td> <td></td> </tr> <tr> <td>Fe/PMA@COF-300</td> <td>62</td> <td></td> </tr> <tr> <td rowspan="1"> </td> <td>Fe/PMA@CIN-1</td> <td>58</td> <td>≥99</td> </tr> </tbody> </table> | Substrate | Catalyst | Con. (%)        | Selectivity (%) |  | PMA@COF-LZU1 | 49 |  | Fe/PMA@COF-LZU1 | 69 |  | PMA@CIN-1 | 83 | ≥99 | Fe/PMA@CIN-1 | 88 | ≥99 | PMA@COF-300 | 52 |  | Fe/PMA@COF-300 | 62 |  |  | Fe/PMA@CIN-1 | 58 | ≥99 |
|------------------------------------------------------------------------------------------|-------------------------------------------------------------------------------------------------------------------------------------------------------------------------------------------------------------------------------------------------------------------------------------------------------------------------------------------------------------------------------------------------------------------------------------------------------------------------------------------------------------------------------------------------------------------------------------------------------------------|-----------|----------|-----------------|-----------------|--|--------------|----|--|-----------------|----|--|-----------|----|-----|--------------|----|-----|-------------|----|--|----------------|----|--|--|--------------|----|-----|
|                                                                                          | Substrate                                                                                                                                                                                                                                                                                                                                                                                                                                                                                                                                                                                                         | Catalyst  | Con. (%) | Selectivity (%) |                 |  |              |    |  |                 |    |  |           |    |     |              |    |     |             |    |  |                |    |  |  |              |    |     |
|                                                                                          | PMA@COF-LZU1                                                                                                                                                                                                                                                                                                                                                                                                                                                                                                                                                                                                      | 49        |          |                 |                 |  |              |    |  |                 |    |  |           |    |     |              |    |     |             |    |  |                |    |  |  |              |    |     |
|                                                                                          | Fe/PMA@COF-LZU1                                                                                                                                                                                                                                                                                                                                                                                                                                                                                                                                                                                                   | 69        |          |                 |                 |  |              |    |  |                 |    |  |           |    |     |              |    |     |             |    |  |                |    |  |  |              |    |     |
|                                                                                          | PMA@CIN-1                                                                                                                                                                                                                                                                                                                                                                                                                                                                                                                                                                                                         | 83        | ≥99      |                 |                 |  |              |    |  |                 |    |  |           |    |     |              |    |     |             |    |  |                |    |  |  |              |    |     |
|                                                                                          | Fe/PMA@CIN-1                                                                                                                                                                                                                                                                                                                                                                                                                                                                                                                                                                                                      | 88        | ≥99      |                 |                 |  |              |    |  |                 |    |  |           |    |     |              |    |     |             |    |  |                |    |  |  |              |    |     |
|                                                                                          | PMA@COF-300                                                                                                                                                                                                                                                                                                                                                                                                                                                                                                                                                                                                       | 52        |          |                 |                 |  |              |    |  |                 |    |  |           |    |     |              |    |     |             |    |  |                |    |  |  |              |    |     |
|                                                                                          | Fe/PMA@COF-300                                                                                                                                                                                                                                                                                                                                                                                                                                                                                                                                                                                                    | 62        |          |                 |                 |  |              |    |  |                 |    |  |           |    |     |              |    |     |             |    |  |                |    |  |  |              |    |     |
|                                                                                          | Fe/PMA@CIN-1                                                                                                                                                                                                                                                                                                                                                                                                                                                                                                                                                                                                      | 58        | ≥99      |                 |                 |  |              |    |  |                 |    |  |           |    |     |              |    |     |             |    |  |                |    |  |  |              |    |     |
| <p>Note: The COF and the COF-composites do not exhibit high degree of crystallinity.</p> |                                                                                                                                                                                                                                                                                                                                                                                                                                                                                                                                                                                                                   |           |          |                 |                 |  |              |    |  |                 |    |  |           |    |     |              |    |     |             |    |  |                |    |  |  |              |    |     |

Fe-doped  $H_3PMO_{12}O_{40}$  immobilized on covalent organic frameworks (Fe/PMA@COFs). BET SA: COF-LZU1: **207 m<sup>2</sup>/g**, Fe/PMA@COF-LZU1: **35 m<sup>2</sup>/g**, CIN-1: **246 m<sup>2</sup>/g**, Fe/PMA@CIN-1: **77 m<sup>2</sup>/g**, COF-300: **284 m<sup>2</sup>/g**, Fe/PMA@COF-300: **56 m<sup>2</sup>/g**. Active species: **Fe<sup>3+</sup>** and **PMO<sub>12</sub><sup>3-</sup>**. Reprinted with the permission from the Royal Society of Chemistry (reference S20).

| 5                                                                                                                                                                                                                                                                                                                                                                                                                                                                                                                                                                                                                                                                                                                                                                                                                                                                                                                                                                                                                                                                                                                                                                                                                                                                                                                                                                                                                                                                      |           | <p>Mn-CPF-catalysed epoxidation of alkenes.</p> <p><b>S21</b></p> |           |                         |                          |                         |                          |   |  |  |          |                    |                    |   |  |  |          |    |    |   |  |  |          |    |     |   |  |  |          |    |     |   |  |  |          |    |     |   |  |  |          |    |     |   |  |  |          |    |     |
|------------------------------------------------------------------------------------------------------------------------------------------------------------------------------------------------------------------------------------------------------------------------------------------------------------------------------------------------------------------------------------------------------------------------------------------------------------------------------------------------------------------------------------------------------------------------------------------------------------------------------------------------------------------------------------------------------------------------------------------------------------------------------------------------------------------------------------------------------------------------------------------------------------------------------------------------------------------------------------------------------------------------------------------------------------------------------------------------------------------------------------------------------------------------------------------------------------------------------------------------------------------------------------------------------------------------------------------------------------------------------------------------------------------------------------------------------------------------|-----------|-------------------------------------------------------------------|-----------|-------------------------|--------------------------|-------------------------|--------------------------|---|--|--|----------|--------------------|--------------------|---|--|--|----------|----|----|---|--|--|----------|----|-----|---|--|--|----------|----|-----|---|--|--|----------|----|-----|---|--|--|----------|----|-----|---|--|--|----------|----|-----|
| <p><b>Scope of Mn-CPF-catalysed epoxidation of alkenes<sup>a</sup></b></p> <table border="1"> <thead> <tr> <th>Entry</th> <th>Substrate</th> <th>Product</th> <th>Catalyst</th> <th>Conversion<sup>b</sup></th> <th>Selectivity<sup>c</sup></th> </tr> </thead> <tbody> <tr> <td>1</td> <td></td> <td></td> <td>Mn-CPF-1</td> <td>99/96<sup>d</sup></td> <td>68/62<sup>e</sup></td> </tr> <tr> <td>2</td> <td></td> <td></td> <td>Mn-CPF-2</td> <td>93</td> <td>60</td> </tr> <tr> <td>3</td> <td></td> <td></td> <td>Mn-CPF-1</td> <td>99</td> <td>&gt;99</td> </tr> <tr> <td>4</td> <td></td> <td></td> <td>Mn-CPF-1</td> <td>95</td> <td>&gt;99</td> </tr> <tr> <td>5</td> <td></td> <td></td> <td>Mn-CPF-1</td> <td>81</td> <td>&gt;99</td> </tr> <tr> <td>6</td> <td></td> <td></td> <td>Mn-CPF-1</td> <td>66</td> <td>&gt;99</td> </tr> <tr> <td>7</td> <td></td> <td></td> <td>Mn-CPF-1</td> <td>20</td> <td>&gt;99</td> </tr> </tbody> </table> <p><sup>a</sup>Olefin (1.0 mmol), TBHP (1.5 mmol), catalyst (0.01 mmol), acetonitrile (3.0 ml) and bromobenzene (50 mg) as an internal standards sealed in a Teflon-lined screwcap vial were stirred at 80 °C for 24h.<br/> <sup>b</sup>Conversion (%). <sup>c</sup>Selectivity (%) were determined by GC using an SE-54 column. 50 °C for 1min, then 10 °C per min upto 140 °C and 140 °C for 15min. <sup>d</sup>After third cycle. <sup>e</sup>The byproducts were benzaldehyde and benzeneacetaldehyde.</p> |           | Entry                                                             | Substrate | Product                 | Catalyst                 | Conversion <sup>b</sup> | Selectivity <sup>c</sup> | 1 |  |  | Mn-CPF-1 | 99/96 <sup>d</sup> | 68/62 <sup>e</sup> | 2 |  |  | Mn-CPF-2 | 93 | 60 | 3 |  |  | Mn-CPF-1 | 99 | >99 | 4 |  |  | Mn-CPF-1 | 95 | >99 | 5 |  |  | Mn-CPF-1 | 81 | >99 | 6 |  |  | Mn-CPF-1 | 66 | >99 | 7 |  |  | Mn-CPF-1 | 20 | >99 |
| Entry                                                                                                                                                                                                                                                                                                                                                                                                                                                                                                                                                                                                                                                                                                                                                                                                                                                                                                                                                                                                                                                                                                                                                                                                                                                                                                                                                                                                                                                                  | Substrate | Product                                                           | Catalyst  | Conversion <sup>b</sup> | Selectivity <sup>c</sup> |                         |                          |   |  |  |          |                    |                    |   |  |  |          |    |    |   |  |  |          |    |     |   |  |  |          |    |     |   |  |  |          |    |     |   |  |  |          |    |     |   |  |  |          |    |     |
| 1                                                                                                                                                                                                                                                                                                                                                                                                                                                                                                                                                                                                                                                                                                                                                                                                                                                                                                                                                                                                                                                                                                                                                                                                                                                                                                                                                                                                                                                                      |           |                                                                   | Mn-CPF-1  | 99/96 <sup>d</sup>      | 68/62 <sup>e</sup>       |                         |                          |   |  |  |          |                    |                    |   |  |  |          |    |    |   |  |  |          |    |     |   |  |  |          |    |     |   |  |  |          |    |     |   |  |  |          |    |     |   |  |  |          |    |     |
| 2                                                                                                                                                                                                                                                                                                                                                                                                                                                                                                                                                                                                                                                                                                                                                                                                                                                                                                                                                                                                                                                                                                                                                                                                                                                                                                                                                                                                                                                                      |           |                                                                   | Mn-CPF-2  | 93                      | 60                       |                         |                          |   |  |  |          |                    |                    |   |  |  |          |    |    |   |  |  |          |    |     |   |  |  |          |    |     |   |  |  |          |    |     |   |  |  |          |    |     |   |  |  |          |    |     |
| 3                                                                                                                                                                                                                                                                                                                                                                                                                                                                                                                                                                                                                                                                                                                                                                                                                                                                                                                                                                                                                                                                                                                                                                                                                                                                                                                                                                                                                                                                      |           |                                                                   | Mn-CPF-1  | 99                      | >99                      |                         |                          |   |  |  |          |                    |                    |   |  |  |          |    |    |   |  |  |          |    |     |   |  |  |          |    |     |   |  |  |          |    |     |   |  |  |          |    |     |   |  |  |          |    |     |
| 4                                                                                                                                                                                                                                                                                                                                                                                                                                                                                                                                                                                                                                                                                                                                                                                                                                                                                                                                                                                                                                                                                                                                                                                                                                                                                                                                                                                                                                                                      |           |                                                                   | Mn-CPF-1  | 95                      | >99                      |                         |                          |   |  |  |          |                    |                    |   |  |  |          |    |    |   |  |  |          |    |     |   |  |  |          |    |     |   |  |  |          |    |     |   |  |  |          |    |     |   |  |  |          |    |     |
| 5                                                                                                                                                                                                                                                                                                                                                                                                                                                                                                                                                                                                                                                                                                                                                                                                                                                                                                                                                                                                                                                                                                                                                                                                                                                                                                                                                                                                                                                                      |           |                                                                   | Mn-CPF-1  | 81                      | >99                      |                         |                          |   |  |  |          |                    |                    |   |  |  |          |    |    |   |  |  |          |    |     |   |  |  |          |    |     |   |  |  |          |    |     |   |  |  |          |    |     |   |  |  |          |    |     |
| 6                                                                                                                                                                                                                                                                                                                                                                                                                                                                                                                                                                                                                                                                                                                                                                                                                                                                                                                                                                                                                                                                                                                                                                                                                                                                                                                                                                                                                                                                      |           |                                                                   | Mn-CPF-1  | 66                      | >99                      |                         |                          |   |  |  |          |                    |                    |   |  |  |          |    |    |   |  |  |          |    |     |   |  |  |          |    |     |   |  |  |          |    |     |   |  |  |          |    |     |   |  |  |          |    |     |
| 7                                                                                                                                                                                                                                                                                                                                                                                                                                                                                                                                                                                                                                                                                                                                                                                                                                                                                                                                                                                                                                                                                                                                                                                                                                                                                                                                                                                                                                                                      |           |                                                                   | Mn-CPF-1  | 20                      | >99                      |                         |                          |   |  |  |          |                    |                    |   |  |  |          |    |    |   |  |  |          |    |     |   |  |  |          |    |     |   |  |  |          |    |     |   |  |  |          |    |     |   |  |  |          |    |     |

BET SA for CPF-1 and CPF-2 are **158** and **92 m<sup>2</sup>/g**. ICP-MS: Mn content of **1.7 mmol/g** for Mn-CPF-1 and **1.6 mmol/g** for Mn-CPF-2. Active metal: **Mn(II)**. Reprinted with the permission from the Royal Society of Chemistry (reference S21).

### Glaser-Hay Coupling

| 6                                                                                                                      |                                    | <p><b>S22</b></p> <table border="1"> <thead> <tr> <th>Product</th> <th>R<sub>1</sub> + R<sub>2</sub></th> <th>R<sub>1</sub> + R<sub>2</sub></th> <th>R<sub>1</sub> + R<sub>2</sub></th> </tr> </thead> <tbody> <tr> <td>1a: 75%; 188; 47</td> <td>1b: 72%; 181; 45</td> <td>1d: 71%; 178; 44</td> <td></td> </tr> <tr> <td>2a: 73%; 183; 46</td> <td>2b: 72%; 181; 45</td> <td>2d: 69%; 173; 43</td> <td></td> </tr> <tr> <td>3a: 65%; 163; 40</td> <td>3b: 68%; 171; 42</td> <td>3d: 65%; 163; 40</td> <td></td> </tr> <tr> <td>F<sub>3</sub>C-4a: 76%; 191; 48</td> <td>F<sub>3</sub>C-4b: 78%; 196; 49</td> <td>F<sub>3</sub>C-4d: 72%; 181; 45</td> <td></td> </tr> <tr> <td>Br-5a: 74%; 186; 47</td> <td>Br-5b: 66%; 166; 41</td> <td>Br-5d: 68%; 171; 42</td> <td></td> </tr> <tr> <td>H<sub>3</sub>CO-6a: 72%; 181; 45</td> <td>H<sub>3</sub>CO-6b: 74%; 186; 46</td> <td>H<sub>3</sub>CO-6d: 73%; 183; 46</td> <td></td> </tr> <tr> <td>H<sub>3</sub>CO-7a: 68%; 171; 42</td> <td>H<sub>3</sub>CO-7b: 67%; 168; 42</td> <td>H<sub>3</sub>CO-7d: 75%; 188; 47</td> <td></td> </tr> </tbody> </table> | Product                         | R <sub>1</sub> + R <sub>2</sub> | R <sub>1</sub> + R <sub>2</sub> | R <sub>1</sub> + R <sub>2</sub> | 1a: 75%; 188; 47 | 1b: 72%; 181; 45 | 1d: 71%; 178; 44 |  | 2a: 73%; 183; 46 | 2b: 72%; 181; 45 | 2d: 69%; 173; 43 |  | 3a: 65%; 163; 40 | 3b: 68%; 171; 42 | 3d: 65%; 163; 40 |  | F <sub>3</sub> C-4a: 76%; 191; 48 | F <sub>3</sub> C-4b: 78%; 196; 49 | F <sub>3</sub> C-4d: 72%; 181; 45 |  | Br-5a: 74%; 186; 47 | Br-5b: 66%; 166; 41 | Br-5d: 68%; 171; 42 |  | H <sub>3</sub> CO-6a: 72%; 181; 45 | H <sub>3</sub> CO-6b: 74%; 186; 46 | H <sub>3</sub> CO-6d: 73%; 183; 46 |  | H <sub>3</sub> CO-7a: 68%; 171; 42 | H <sub>3</sub> CO-7b: 67%; 168; 42 | H <sub>3</sub> CO-7d: 75%; 188; 47 |  |
|------------------------------------------------------------------------------------------------------------------------|------------------------------------|-------------------------------------------------------------------------------------------------------------------------------------------------------------------------------------------------------------------------------------------------------------------------------------------------------------------------------------------------------------------------------------------------------------------------------------------------------------------------------------------------------------------------------------------------------------------------------------------------------------------------------------------------------------------------------------------------------------------------------------------------------------------------------------------------------------------------------------------------------------------------------------------------------------------------------------------------------------------------------------------------------------------------------------------------------------------------------------------------------------|---------------------------------|---------------------------------|---------------------------------|---------------------------------|------------------|------------------|------------------|--|------------------|------------------|------------------|--|------------------|------------------|------------------|--|-----------------------------------|-----------------------------------|-----------------------------------|--|---------------------|---------------------|---------------------|--|------------------------------------|------------------------------------|------------------------------------|--|------------------------------------|------------------------------------|------------------------------------|--|
| Product                                                                                                                | R <sub>1</sub> + R <sub>2</sub>    | R <sub>1</sub> + R <sub>2</sub>                                                                                                                                                                                                                                                                                                                                                                                                                                                                                                                                                                                                                                                                                                                                                                                                                                                                                                                                                                                                                                                                             | R <sub>1</sub> + R <sub>2</sub> |                                 |                                 |                                 |                  |                  |                  |  |                  |                  |                  |  |                  |                  |                  |  |                                   |                                   |                                   |  |                     |                     |                     |  |                                    |                                    |                                    |  |                                    |                                    |                                    |  |
| 1a: 75%; 188; 47                                                                                                       | 1b: 72%; 181; 45                   | 1d: 71%; 178; 44                                                                                                                                                                                                                                                                                                                                                                                                                                                                                                                                                                                                                                                                                                                                                                                                                                                                                                                                                                                                                                                                                            |                                 |                                 |                                 |                                 |                  |                  |                  |  |                  |                  |                  |  |                  |                  |                  |  |                                   |                                   |                                   |  |                     |                     |                     |  |                                    |                                    |                                    |  |                                    |                                    |                                    |  |
| 2a: 73%; 183; 46                                                                                                       | 2b: 72%; 181; 45                   | 2d: 69%; 173; 43                                                                                                                                                                                                                                                                                                                                                                                                                                                                                                                                                                                                                                                                                                                                                                                                                                                                                                                                                                                                                                                                                            |                                 |                                 |                                 |                                 |                  |                  |                  |  |                  |                  |                  |  |                  |                  |                  |  |                                   |                                   |                                   |  |                     |                     |                     |  |                                    |                                    |                                    |  |                                    |                                    |                                    |  |
| 3a: 65%; 163; 40                                                                                                       | 3b: 68%; 171; 42                   | 3d: 65%; 163; 40                                                                                                                                                                                                                                                                                                                                                                                                                                                                                                                                                                                                                                                                                                                                                                                                                                                                                                                                                                                                                                                                                            |                                 |                                 |                                 |                                 |                  |                  |                  |  |                  |                  |                  |  |                  |                  |                  |  |                                   |                                   |                                   |  |                     |                     |                     |  |                                    |                                    |                                    |  |                                    |                                    |                                    |  |
| F <sub>3</sub> C-4a: 76%; 191; 48                                                                                      | F <sub>3</sub> C-4b: 78%; 196; 49  | F <sub>3</sub> C-4d: 72%; 181; 45                                                                                                                                                                                                                                                                                                                                                                                                                                                                                                                                                                                                                                                                                                                                                                                                                                                                                                                                                                                                                                                                           |                                 |                                 |                                 |                                 |                  |                  |                  |  |                  |                  |                  |  |                  |                  |                  |  |                                   |                                   |                                   |  |                     |                     |                     |  |                                    |                                    |                                    |  |                                    |                                    |                                    |  |
| Br-5a: 74%; 186; 47                                                                                                    | Br-5b: 66%; 166; 41                | Br-5d: 68%; 171; 42                                                                                                                                                                                                                                                                                                                                                                                                                                                                                                                                                                                                                                                                                                                                                                                                                                                                                                                                                                                                                                                                                         |                                 |                                 |                                 |                                 |                  |                  |                  |  |                  |                  |                  |  |                  |                  |                  |  |                                   |                                   |                                   |  |                     |                     |                     |  |                                    |                                    |                                    |  |                                    |                                    |                                    |  |
| H <sub>3</sub> CO-6a: 72%; 181; 45                                                                                     | H <sub>3</sub> CO-6b: 74%; 186; 46 | H <sub>3</sub> CO-6d: 73%; 183; 46                                                                                                                                                                                                                                                                                                                                                                                                                                                                                                                                                                                                                                                                                                                                                                                                                                                                                                                                                                                                                                                                          |                                 |                                 |                                 |                                 |                  |                  |                  |  |                  |                  |                  |  |                  |                  |                  |  |                                   |                                   |                                   |  |                     |                     |                     |  |                                    |                                    |                                    |  |                                    |                                    |                                    |  |
| H <sub>3</sub> CO-7a: 68%; 171; 42                                                                                     | H <sub>3</sub> CO-7b: 67%; 168; 42 | H <sub>3</sub> CO-7d: 75%; 188; 47                                                                                                                                                                                                                                                                                                                                                                                                                                                                                                                                                                                                                                                                                                                                                                                                                                                                                                                                                                                                                                                                          |                                 |                                 |                                 |                                 |                  |                  |                  |  |                  |                  |                  |  |                  |                  |                  |  |                                   |                                   |                                   |  |                     |                     |                     |  |                                    |                                    |                                    |  |                                    |                                    |                                    |  |
| <p>High selectivity for heteroproducts governed by substrate binding and orientation directed by the COF nanopore.</p> |                                    |                                                                                                                                                                                                                                                                                                                                                                                                                                                                                                                                                                                                                                                                                                                                                                                                                                                                                                                                                                                                                                                                                                             |                                 |                                 |                                 |                                 |                  |                  |                  |  |                  |                  |                  |  |                  |                  |                  |  |                                   |                                   |                                   |  |                     |                     |                     |  |                                    |                                    |                                    |  |                                    |                                    |                                    |  |

Periodic lining of the channels by the hydrogen-bonding hydroxyl and basic pyridyl sites (shown in cyan) and the channel dimensions.

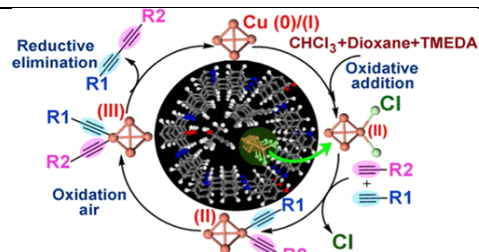

Reaction mechanism based on cyclic voltammetry and XPS done on frozen reactions. Labile Cl and variable oxidations on Cu are crucial.

BET SA: **1171 m<sup>2</sup>/g** and pore size **13 Å**. Cu content **~5 wt%**. Active metal is **Cu(0)/Cu(I)**. Reprinted with the permission from the American Chemical Society (reference S22).

### Chan-Lamcoupling

7

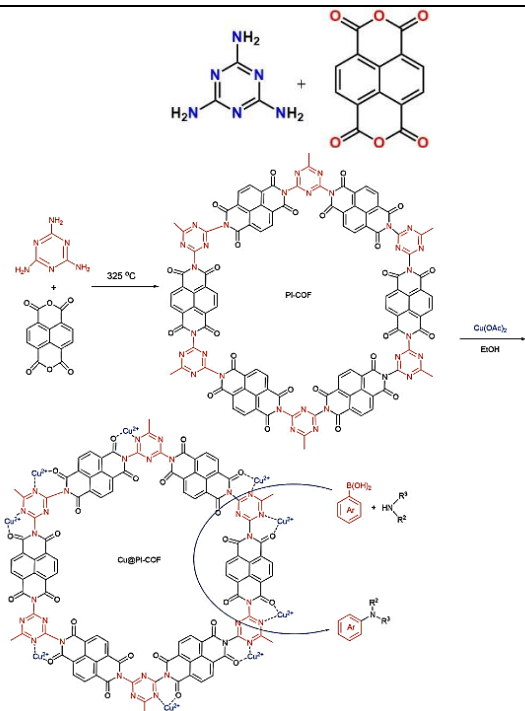

Chan-Lamcoupling reaction of aryl boronic acids and amines.

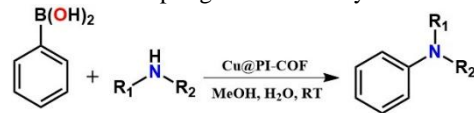

R<sub>1</sub> and R<sub>2</sub> are different aliphatic and aromatic groups.  
Yield: >80%

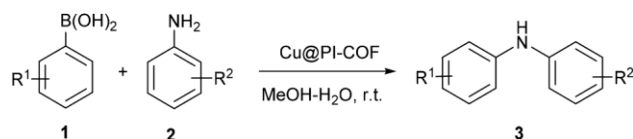

*N*-arylation of 1*H*-indazol-3-amine has also been investigated. For all three reactions several electron withdrawing and donating substrate scope has been investigated.

S23

The structure has not been modeled and the PXRD does not suggest a typical COF structure. No porosity has been reported. ICP-MS: Cu loading **5.33 wt%**. Active species: **Cu(II)**. Reprinted with the permission from the Royal Society of Chemistry (reference S23).

### Prins Reaction and Mannich-Type Reaction

8

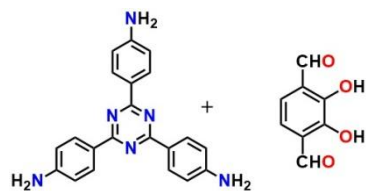

Prins condensation:

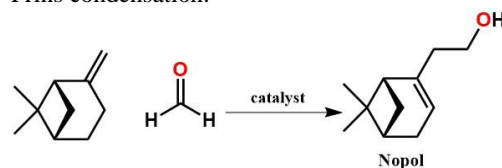

Yield >90%.

S24

| 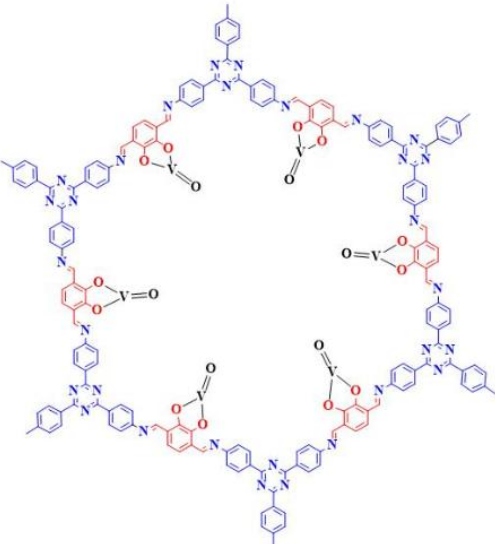 <p style="text-align: center;"><b>VO-TAPT-2,3-DHTA COF</b></p> <p>Existence of V<sup>4+</sup> is supported by XPS and EPR spectra.</p>                                                  | <p><b>Sulfide Oxidation with Differently Substituted Substrates Catalyzed with VO-TAPT-2,3-DHTA COF and Other Homogenous Analogue<sup>a</sup></b></p> <table border="1"> <thead> <tr> <th>Entry</th> <th>Sulphide</th> <th>Sulphoxide</th> <th>Time (h)</th> <th>Conver. %</th> <th>Yield %</th> </tr> </thead> <tbody> <tr> <td>1</td> <td></td> <td></td> <td>4</td> <td>99</td> <td>96</td> </tr> <tr> <td>2</td> <td></td> <td></td> <td>4</td> <td>99</td> <td>95</td> </tr> <tr> <td>3<sup>b</sup></td> <td></td> <td></td> <td>4</td> <td>84</td> <td>75</td> </tr> <tr> <td>4<sup>c</sup></td> <td></td> <td></td> <td>4</td> <td>93</td> <td>81</td> </tr> <tr> <td>5</td> <td></td> <td></td> <td>4</td> <td>96</td> <td>92</td> </tr> <tr> <td>6</td> <td></td> <td></td> <td>4</td> <td>97</td> <td>93</td> </tr> <tr> <td>7</td> <td></td> <td></td> <td>4</td> <td>88</td> <td>82</td> </tr> </tbody> </table> <p><sup>a</sup>Reaction condition: Sulfide (1.0 mmol), TBHP (1.5 mmol), catalyst (20mg) containing 0.019 mmol of vanadium; CH<sub>3</sub>CN (3mL); 25 C; 100rpm; 4h. <sup>b</sup>Reaction was carried out using VO(acac)<sub>2</sub> (4mol%); <sup>c</sup>using VO(catechol)<sub>2</sub> (4mol%)</p> | Entry                                                                               | Sulphide   | Sulphoxide | Time (h)  | Conver. % | Yield % | 1 |  |  | 4 | 99 | 96 | 2 |  |  | 4 | 99 | 95 | 3 <sup>b</sup> |  |  | 4 | 84 | 75 | 4 <sup>c</sup> |  |  | 4 | 93 | 81 | 5 |  |  | 4 | 96 | 92 | 6 |  |  | 4 | 97 | 93 | 7 |  |  | 4 | 88 | 82 |
|---------------------------------------------------------------------------------------------------------------------------------------------------------------------------------------------------------------------------------------------------------------------------|--------------------------------------------------------------------------------------------------------------------------------------------------------------------------------------------------------------------------------------------------------------------------------------------------------------------------------------------------------------------------------------------------------------------------------------------------------------------------------------------------------------------------------------------------------------------------------------------------------------------------------------------------------------------------------------------------------------------------------------------------------------------------------------------------------------------------------------------------------------------------------------------------------------------------------------------------------------------------------------------------------------------------------------------------------------------------------------------------------------------------------------------------------------------------------------------------------------------------------------------------------------------------------------------------------------------------------------------------------------------------------------------------------------------------------------------------------------------------------------------------------------------------------------------------------------------------------------------------------------------------------------------------------------------------------------------------------------------------------------------------------------------------------------------------------------------------------------------------------------------------------------------------------------------------------------------------------------------------------------------------------------------------------------------------------------------------------------------------------------------------------------------------------------------------------------------------------------------------------------------------------------------------------------------------------------------------------------------------------------------------------------------------------------------------------------|-------------------------------------------------------------------------------------|------------|------------|-----------|-----------|---------|---|------------------------------------------------------------------------------------|-------------------------------------------------------------------------------------|---|----|----|---|------------------------------------------------------------------------------------|-------------------------------------------------------------------------------------|---|----|----|----------------|------------------------------------------------------------------------------------|-------------------------------------------------------------------------------------|---|----|----|----------------|------------------------------------------------------------------------------------|-------------------------------------------------------------------------------------|---|----|----|---|------------------------------------------------------------------------------------|-------------------------------------------------------------------------------------|---|----|----|---|------------------------------------------------------------------------------------|-------------------------------------------------------------------------------------|---|----|----|---|------------------------------------------------------------------------------------|-------------------------------------------------------------------------------------|---|----|----|
|                                                                                                                                                                                                                                                                           | Entry                                                                                                                                                                                                                                                                                                                                                                                                                                                                                                                                                                                                                                                                                                                                                                                                                                                                                                                                                                                                                                                                                                                                                                                                                                                                                                                                                                                                                                                                                                                                                                                                                                                                                                                                                                                                                                                                                                                                                                                                                                                                                                                                                                                                                                                                                                                                                                                                                                | Sulphide                                                                            | Sulphoxide | Time (h)   | Conver. % | Yield %   |         |   |                                                                                    |                                                                                     |   |    |    |   |                                                                                    |                                                                                     |   |    |    |                |                                                                                    |                                                                                     |   |    |    |                |                                                                                    |                                                                                     |   |    |    |   |                                                                                    |                                                                                     |   |    |    |   |                                                                                    |                                                                                     |   |    |    |   |                                                                                    |                                                                                     |   |    |    |
| 1                                                                                                                                                                                                                                                                         |                                                                                                                                                                                                                                                                                                                                                                                                                                                                                                                                                                                                                                                                                                                                                                                                                                                                                                                                                                                                                                                                                                                                                                                                                                                                                                                                                                                                                                                                                                                                                                                                                                                                                                                                                                                                                                                                                                                                                                                                                                                                                                                                                                                                                                                                                                                                                    |  | 4          | 99         | 96        |           |         |   |                                                                                    |                                                                                     |   |    |    |   |                                                                                    |                                                                                     |   |    |    |                |                                                                                    |                                                                                     |   |    |    |                |                                                                                    |                                                                                     |   |    |    |   |                                                                                    |                                                                                     |   |    |    |   |                                                                                    |                                                                                     |   |    |    |   |                                                                                    |                                                                                     |   |    |    |
| 2                                                                                                                                                                                                                                                                         |                                                                                                                                                                                                                                                                                                                                                                                                                                                                                                                                                                                                                                                                                                                                                                                                                                                                                                                                                                                                                                                                                                                                                                                                                                                                                                                                                                                                                                                                                                                                                                                                                                                                                                                                                                                                                                                                                                                                                                                                                                                                                                                                                                                                                                                                                                                                                    |  | 4          | 99         | 95        |           |         |   |                                                                                    |                                                                                     |   |    |    |   |                                                                                    |                                                                                     |   |    |    |                |                                                                                    |                                                                                     |   |    |    |                |                                                                                    |                                                                                     |   |    |    |   |                                                                                    |                                                                                     |   |    |    |   |                                                                                    |                                                                                     |   |    |    |   |                                                                                    |                                                                                     |   |    |    |
| 3 <sup>b</sup>                                                                                                                                                                                                                                                            |                                                                                                                                                                                                                                                                                                                                                                                                                                                                                                                                                                                                                                                                                                                                                                                                                                                                                                                                                                                                                                                                                                                                                                                                                                                                                                                                                                                                                                                                                                                                                                                                                                                                                                                                                                                                                                                                                                                                                                                                                                                                                                                                                                                                                                                                                                                                                    |  | 4          | 84         | 75        |           |         |   |                                                                                    |                                                                                     |   |    |    |   |                                                                                    |                                                                                     |   |    |    |                |                                                                                    |                                                                                     |   |    |    |                |                                                                                    |                                                                                     |   |    |    |   |                                                                                    |                                                                                     |   |    |    |   |                                                                                    |                                                                                     |   |    |    |   |                                                                                    |                                                                                     |   |    |    |
| 4 <sup>c</sup>                                                                                                                                                                                                                                                            |                                                                                                                                                                                                                                                                                                                                                                                                                                                                                                                                                                                                                                                                                                                                                                                                                                                                                                                                                                                                                                                                                                                                                                                                                                                                                                                                                                                                                                                                                                                                                                                                                                                                                                                                                                                                                                                                                                                                                                                                                                                                                                                                                                                                                                                                                                                                                    |  | 4          | 93         | 81        |           |         |   |                                                                                    |                                                                                     |   |    |    |   |                                                                                    |                                                                                     |   |    |    |                |                                                                                    |                                                                                     |   |    |    |                |                                                                                    |                                                                                     |   |    |    |   |                                                                                    |                                                                                     |   |    |    |   |                                                                                    |                                                                                     |   |    |    |   |                                                                                    |                                                                                     |   |    |    |
| 5                                                                                                                                                                                                                                                                         |                                                                                                                                                                                                                                                                                                                                                                                                                                                                                                                                                                                                                                                                                                                                                                                                                                                                                                                                                                                                                                                                                                                                                                                                                                                                                                                                                                                                                                                                                                                                                                                                                                                                                                                                                                                                                                                                                                                                                                                                                                                                                                                                                                                                                                                                                                                                                    |  | 4          | 96         | 92        |           |         |   |                                                                                    |                                                                                     |   |    |    |   |                                                                                    |                                                                                     |   |    |    |                |                                                                                    |                                                                                     |   |    |    |                |                                                                                    |                                                                                     |   |    |    |   |                                                                                    |                                                                                     |   |    |    |   |                                                                                    |                                                                                     |   |    |    |   |                                                                                    |                                                                                     |   |    |    |
| 6                                                                                                                                                                                                                                                                         |                                                                                                                                                                                                                                                                                                                                                                                                                                                                                                                                                                                                                                                                                                                                                                                                                                                                                                                                                                                                                                                                                                                                                                                                                                                                                                                                                                                                                                                                                                                                                                                                                                                                                                                                                                                                                                                                                                                                                                                                                                                                                                                                                                                                                                                                                                                                                    |  | 4          | 97         | 93        |           |         |   |                                                                                    |                                                                                     |   |    |    |   |                                                                                    |                                                                                     |   |    |    |                |                                                                                    |                                                                                     |   |    |    |                |                                                                                    |                                                                                     |   |    |    |   |                                                                                    |                                                                                     |   |    |    |   |                                                                                    |                                                                                     |   |    |    |   |                                                                                    |                                                                                     |   |    |    |
| 7                                                                                                                                                                                                                                                                         |                                                                                                                                                                                                                                                                                                                                                                                                                                                                                                                                                                                                                                                                                                                                                                                                                                                                                                                                                                                                                                                                                                                                                                                                                                                                                                                                                                                                                                                                                                                                                                                                                                                                                                                                                                                                                                                                                                                                                                                                                                                                                                                                                                                                                                                                                                                                                    |  | 4          | 88         | 82        |           |         |   |                                                                                    |                                                                                     |   |    |    |   |                                                                                    |                                                                                     |   |    |    |                |                                                                                    |                                                                                     |   |    |    |                |                                                                                    |                                                                                     |   |    |    |   |                                                                                    |                                                                                     |   |    |    |   |                                                                                    |                                                                                     |   |    |    |   |                                                                                    |                                                                                     |   |    |    |
| <p>BET SA of TAPT-2,3-DHTA and VO-TAPT-2,3-DHTA are <b>1151</b> and <b>562 m<sup>2</sup>/g</b>. Pore sizes are <b>3</b> and <b>2.5 nm</b>, respectively. Active metal: <b>V(V)</b>. Reprinted with the permission from the American Chemical Society (reference S24).</p> |                                                                                                                                                                                                                                                                                                                                                                                                                                                                                                                                                                                                                                                                                                                                                                                                                                                                                                                                                                                                                                                                                                                                                                                                                                                                                                                                                                                                                                                                                                                                                                                                                                                                                                                                                                                                                                                                                                                                                                                                                                                                                                                                                                                                                                                                                                                                                                                                                                      |                                                                                     |            |            |           |           |         |   |                                                                                    |                                                                                     |   |    |    |   |                                                                                    |                                                                                     |   |    |    |                |                                                                                    |                                                                                     |   |    |    |                |                                                                                    |                                                                                     |   |    |    |   |                                                                                    |                                                                                     |   |    |    |   |                                                                                    |                                                                                     |   |    |    |   |                                                                                    |                                                                                     |   |    |    |

|                                                                                                                                                                                                                                                                                                                                                                                                                                                                                                                                                                                       |                                                                                                                                                                                      |                                                                                                                                                                                                                                                                                                             |     |
|---------------------------------------------------------------------------------------------------------------------------------------------------------------------------------------------------------------------------------------------------------------------------------------------------------------------------------------------------------------------------------------------------------------------------------------------------------------------------------------------------------------------------------------------------------------------------------------|--------------------------------------------------------------------------------------------------------------------------------------------------------------------------------------|-------------------------------------------------------------------------------------------------------------------------------------------------------------------------------------------------------------------------------------------------------------------------------------------------------------|-----|
| 9                                                                                                                                                                                                                                                                                                                                                                                                                                                                                                                                                                                     | 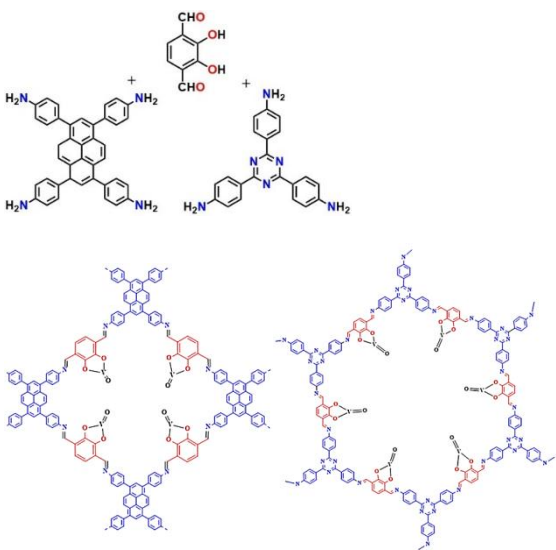 <p style="text-align: center;"><b>VO-PyTTA-2,3-DHTA COF</b>      <b>VO-TAPT-2,3-DHTA COF</b></p> | <p><b>Mannich-Type Reaction</b></p>  <p>Different phenolic substrates are used.<br/>Yield &gt;90 %.</p> <p>Proposed mechanism:</p>  | S25 |
| <p>BET surface area and pore size: TAPT-2,3-DHTA and PyTTA-2,3-DHTA COFs are <b>1151 m<sup>2</sup>/g, 3.0 nm</b> and <b>1892 m<sup>2</sup>/g, 1.6 nm</b>, respectively. CO<sub>2</sub> capacities of the TAPT-2,3-DHTA and PyTTA-2,3-DHTA COFs are 38 cc/g and 35 cc/g at 298K at 1 bar. BET SA and pore sizes of V doped COFs: VO-TAPT-2,3-DHTA and VO-PyTTA-2,3-DHTA are <b>562 m<sup>2</sup>/g, 2.5 nm</b> and <b>1382 m<sup>2</sup>/g, 1.5 nm</b>, respectively. Active metal: <b>V(V)</b>. Reprinted with the permission from the American Chemical Society (reference S25).</p> |                                                                                                                                                                                      |                                                                                                                                                                                                                                                                                                             |     |

|                                |                                          |     |
|--------------------------------|------------------------------------------|-----|
| <b>Cross Coupling reaction</b> |                                          |     |
| 10                             | Decarboxylative cross-coupling reaction: | S26 |

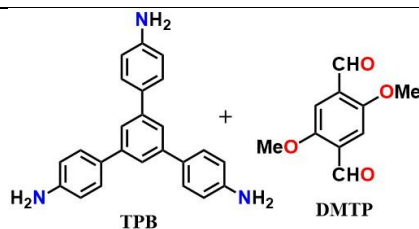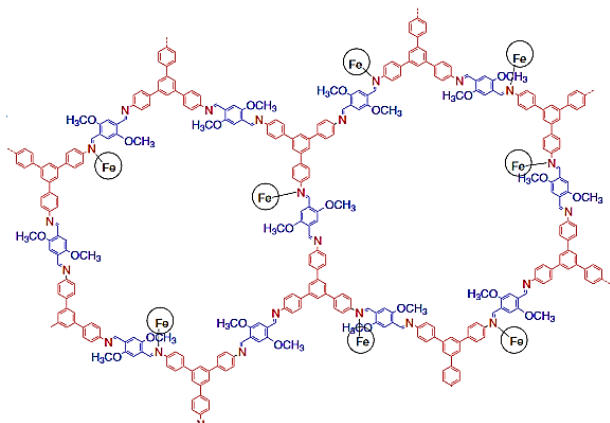

The COF loses crystallinity upon loading of  $\text{FeCl}_3$  under THF at  $70^\circ\text{C}$ . And the porosity drops as reflected by the lowered surface area. But the isotherm profile remains the same (Type IV). A loading of 1.07 mol of  $\text{Fe}^{3+}$  per TBP moiety translating to 3  $\text{Fe}^{3+}$  per cage is estimated.

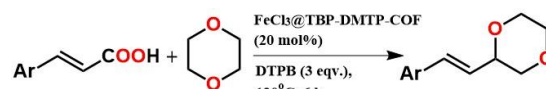

Ar: 4-Cl, 4-OH, 4- $\text{CH}_3$ , 2- $\text{CH}_3$ , 4- $\text{OCH}_3$ , 2- $\text{OCH}_3$  substituted phenyl groups.

| Entry          | Ar | Yield (%) <sup>a</sup> |
|----------------|----|------------------------|
| 1              |    | 79                     |
| 2              |    | 71                     |
| 3 <sup>b</sup> |    | 47                     |
| 4 <sup>c</sup> |    | 42                     |
| 5              |    | 62                     |
| 6              |    | 69                     |
| 7              |    | 73                     |
| 8              |    | 28                     |

Reaction conditions, unless otherwise specified: cinnamic acid (0.067 mmol), 1,4-dioxane (0.5 mL), DTBP (3.0 equivalent),  $\text{FeCl}_3$ @TPB-DMTP-COF (20 mmol%), 6 h,  $120^\circ\text{C}$ ; <sup>a</sup>Isolated yields; <sup>b</sup>E isomer of the cinnamic acid was used; <sup>c</sup>Z isomer of the cinnamic acid was used.

BET SA of TPB-DMTP-COF and  $\text{FeCl}_3$ @TPB-DMTP-COF are **1200** and **235  $\text{m}^2/\text{g}$** . Pore size: **34.3 Å** for TPB-DMTP-COF and **31.4 Å** for  $\text{FeCl}_3$ @TPB-DMTP-COF. AAS:  $\text{Fe}^{3+}$  loading = **7.85 wt%**. Active metal: **Fe(III)**. Reprinted with the permission from the Springer (reference S26).

### Suzuki-Miyaura Coupling

11

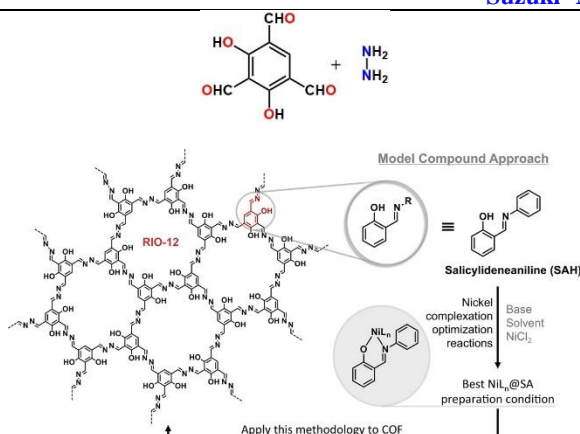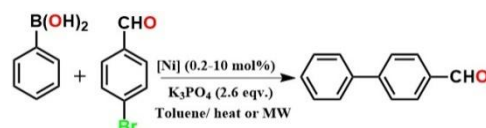

Suzuki-Miyaura cross-coupling reaction catalysed by Ni(II) doped COF. The reaction is done under microwave condition. No activity under conventional reflux conditions. Extreme care has been taken to keep the reactions dry and in a glove box.

Yield: 0 to 34% (only under Microwave conditions)

Note: Interestingly, no  $\text{Ni}^{2+}$  leaching was found, but the activity is only moderate and the conversion drops every cycle. This

S27



The Ni<sup>2+</sup> binding site of the COF resembles simple salicylidene type unit, well known to bind to Ni<sup>2+</sup>.

suggests that even as well dispersed sites anchored on COF, the catalytic activity can be lost over cycles.

BET SA of RIO-12 is **1458 m<sup>2</sup>/g**. Pore is **17 Å**. ICP-AES: Ni<sup>2+</sup> loading = **3.6 to 25 wt %**. Active species: **Ni(II)**. Reprinted with the Wiley Online Library (reference S27).

### Reductive Cleavage of C-S bond or Desulfurization, Nitro/Nitrile reduction reaction

12

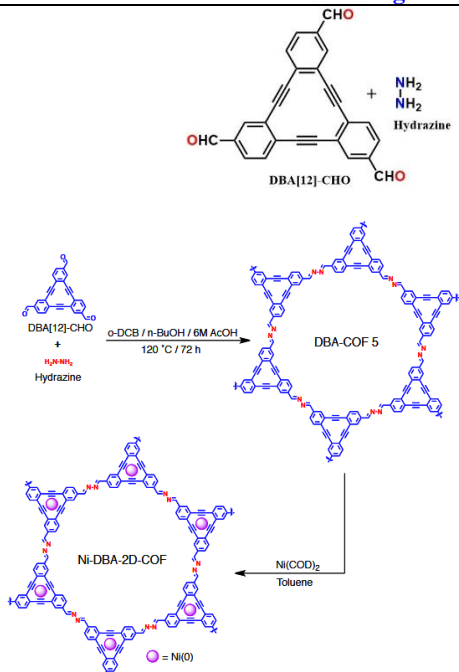

The metal is predominantly bound within the cavity of DBA[12] to produce a Ni(0) 16-electron complex with virtually no interaction at the azine linkage. Hence, the Nickel loading does not alter the surface area substantially.

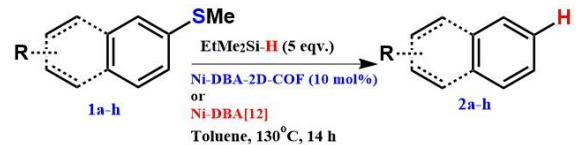

|                      |                        |                      |                      |                        |
|----------------------|------------------------|----------------------|----------------------|------------------------|
| <b>Ni-DBA[12]</b>    | 2a, 26% <sup>d</sup>   | 2b, 45%              | 2c, 99%              | 2d, 38% <sup>d</sup>   |
| <b>Ni-DBA-2D-COF</b> | 2a, 22% <sup>c,d</sup> | 2b, 76% <sup>c</sup> | 2c, 87% <sup>c</sup> | 2d, 45% <sup>c,d</sup> |
| <b>Ni-DBA[12]</b>    | 2e, 79%                | 2f, 72%              | 2g, 5%               | 2h, 9%                 |
| <b>Ni-DBA-2D-COF</b> | 2e, 46% <sup>c</sup>   | 2f, 44% <sup>c</sup> | 2g, 2%               | 2h, 18% <sup>c</sup>   |

Reductive cleavage of aryl C-S bonds.

The DFT calculations suggest that the Ni has to pop out of the DBA[12] cavity and bind with only one alkynyl unit to form a three-coordinate complex before it can oxidatively add into the C(aryl)-SMe bond. Such metal(0) popping out is known in Pd(0) catalysis. This is one of the rare cases, where a first-row transition metal has been suggested to do that.

S28

BET SA: for the DBA-COF 5 and Ni-DBA-2D-COF are **1643** and **1565 m<sup>2</sup>/g**, respectively. The pore sizes are **1.9** and **1.8 nm**, while pore volumes are **0.70** and **0.68 cc/g** for DBA-COF 5 and Ni-DBA-2D-COF respectively (at P/P<sub>0</sub> 0.899). ICP-AES found **8.56 wt%** of Ni. Active metal: **Ni(0)**. Reprinted with the permission from the American Chemical Society (reference S28).

13

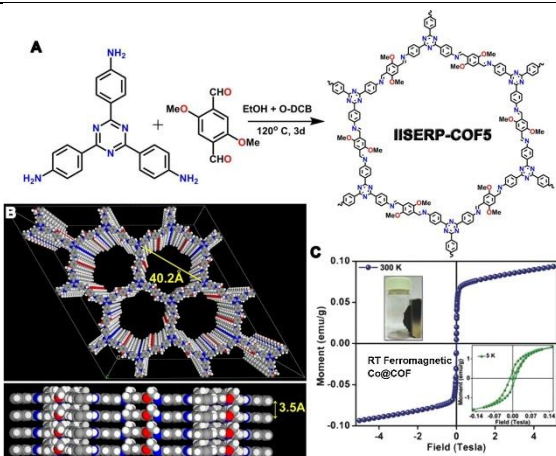

Stabilization of large metal-clusters exceeding limiting pore-size

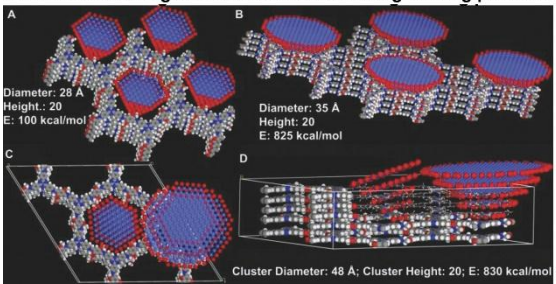

Ferromagnetic Co@COF. Methoxy functionalities renders high chemical stability.

Reduction of nitrile to primary amine

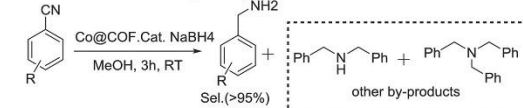

Activation of  $\text{BH}_4^-$  at the Cobalt facets- rapid  $\text{H}_2$  release & reduction

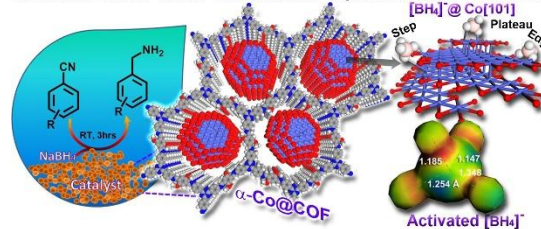

Co@COF catalysed  $\text{H}_2$  evolution from  $\text{NaBH}_4$  in < 2min at RT

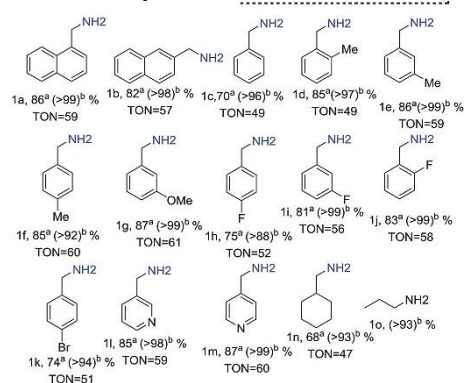

BET SA: IISERP-COF5 =  $1036 \text{ m}^2 \text{ g}^{-1}$ . BJH model: Pore size  $\approx 36 \text{ \AA}$  and pore volume of  $1.154 \text{ cc g}^{-1}$ . Co nP loading: **18 wt%**. Co nP size = **3-5 nm**. Active species: **Co(0) and Co(II)** (from surface  $\text{Co}(\text{OH})_2$ ). Reprinted with the permission from the Wiley Online Library (reference S29).

### Cyanosilylation of aldehydes

14

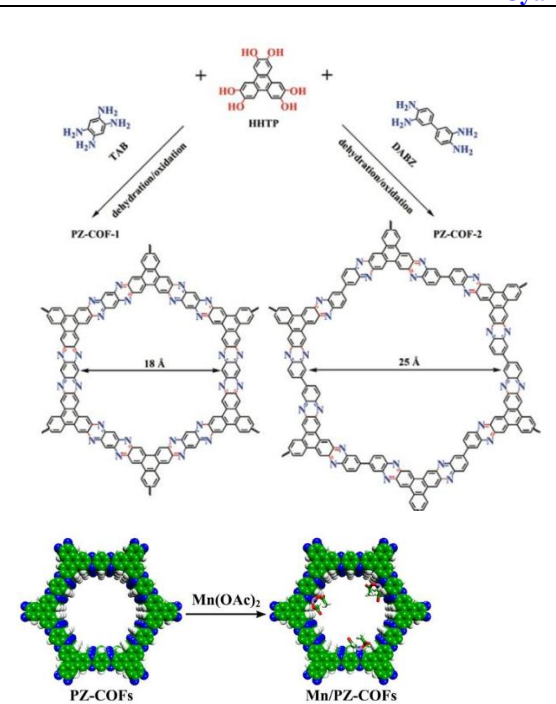

Cyanosilylation of aldehydes:

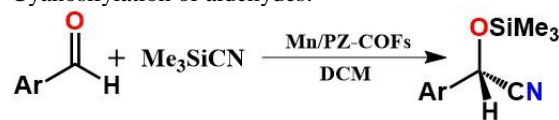

Ar: Phenyl, biphenyl, 1-naphthyl, methoxyphenyl etc.

| Entry | Ar            | Catalyst    | Time (h) | Yield <sup>b</sup> (%) |
|-------|---------------|-------------|----------|------------------------|
| 1     | Phenyl        | Mn/PZ-COF-1 | 6        | 98                     |
| 2     | Phenyl        | Mn/PZ-COF-2 | 5        | 99                     |
| 3     | Biphenyl      | Mn/PZ-COF-1 | 6        | 97                     |
| 4     | Biphenyl      | Mn/PZ-COF-2 | 5        | 97                     |
| 5     | 1-Naphthyl    | Mn/PZ-COF-1 | 6        | 96                     |
| 6     | 1-Naphthyl    | Mn/PZ-COF-2 | 5        | 97                     |
| 7     | Methoxyphenyl | Mn/PZ-COF-1 | 8        | 97                     |
| 8     | Methoxyphenyl | Mn/PZ-COF-2 | 8        | 98                     |
| 9     | Nitrophenyl   | Mn/PZ-COF-1 | 3        | 96                     |
| 10    | Nitrophenyl   | Mn/PZ-COF-2 | 3        | 98                     |

<sup>a</sup> Reaction conditions:  $\text{Me}_3\text{SiCN}$  (1.0 mmol), aldehyde (1.0 mmol), dry  $\text{CH}_2\text{Cl}_2$  (6.0 mL), Mn/PZ-COF-1 or Mn/PZ-COF-2 (0.1 mmol), room temperature, under Ar. <sup>b</sup> Determined by  $^1\text{H}$  NMR based on the starting materials.

Note: Despite well-defined cyclized imine-bond formation, these COFs do not exhibit high degree of crystallinity.

BET SA: PZ-COF-1:  $845 \text{ m}^2/\text{g}$ , PZ-COF-2:  $1130 \text{ m}^2/\text{g}$  and pore sizes **18** and **25 Å**. PZ-COF-1: 121 cc/g of  $\text{H}_2$  at 77K, 68 cc/g of  $\text{CO}_2$  at 273K, 14 cc/g of  $\text{CH}_4$  at 273K. PZ-COF-2: 156 cc/g of  $\text{H}_2$  at 77K, 91 cc/g of  $\text{CO}_2$  at 273K, 21 cc/g of  $\text{CH}_4$  at 273K. ICP: Mn loading was **6.3 wt%**. Active metal: **Mn(II)**. Reprinted with the permission from the Royal Society of Chemistry (reference S30).

S29

S30



**Table S3: Noble-metal@COF as heterogeneous catalyst for organic transformations.**

| Ent.                                                                                                                                                                                                                                                                                                                                                                                                                                                                                                                                                                                                   | Structure and code of the COF and notable properties                                | Catalysed Organic Reaction                                                                                                                                                                                                                                                                                                                                                                                                                                                                                                                                                                                                                                                                                                                                                                                                                                                                                                                                                                                                                                                                                                                                                                                                                                                                                                                                                                                                                                                                                                                                                                                                                                                                                                                                                                                                                                                                                                                          | Ref.                                         |                                               |                                                |                                              |                                            |   |                                    |    |                                            |   |                                                   |         |                               |       |    |   |                                                  |         |    |       |                                               |   |                                                  |       |                                                                  |       |    |    |                                    |       |    |       |    |   |                                    |       |    |       |    |   |                                  |        |    |       |    |   |                                  |        |    |       |    |     |
|--------------------------------------------------------------------------------------------------------------------------------------------------------------------------------------------------------------------------------------------------------------------------------------------------------------------------------------------------------------------------------------------------------------------------------------------------------------------------------------------------------------------------------------------------------------------------------------------------------|-------------------------------------------------------------------------------------|-----------------------------------------------------------------------------------------------------------------------------------------------------------------------------------------------------------------------------------------------------------------------------------------------------------------------------------------------------------------------------------------------------------------------------------------------------------------------------------------------------------------------------------------------------------------------------------------------------------------------------------------------------------------------------------------------------------------------------------------------------------------------------------------------------------------------------------------------------------------------------------------------------------------------------------------------------------------------------------------------------------------------------------------------------------------------------------------------------------------------------------------------------------------------------------------------------------------------------------------------------------------------------------------------------------------------------------------------------------------------------------------------------------------------------------------------------------------------------------------------------------------------------------------------------------------------------------------------------------------------------------------------------------------------------------------------------------------------------------------------------------------------------------------------------------------------------------------------------------------------------------------------------------------------------------------------------|----------------------------------------------|-----------------------------------------------|------------------------------------------------|----------------------------------------------|--------------------------------------------|---|------------------------------------|----|--------------------------------------------|---|---------------------------------------------------|---------|-------------------------------|-------|----|---|--------------------------------------------------|---------|----|-------|-----------------------------------------------|---|--------------------------------------------------|-------|------------------------------------------------------------------|-------|----|----|------------------------------------|-------|----|-------|----|---|------------------------------------|-------|----|-------|----|---|----------------------------------|--------|----|-------|----|---|----------------------------------|--------|----|-------|----|-----|
| <b>Bifunctional Catalysts using pre-designed pyridine groups in COF framework</b>                                                                                                                                                                                                                                                                                                                                                                                                                                                                                                                      |                                                                                     |                                                                                                                                                                                                                                                                                                                                                                                                                                                                                                                                                                                                                                                                                                                                                                                                                                                                                                                                                                                                                                                                                                                                                                                                                                                                                                                                                                                                                                                                                                                                                                                                                                                                                                                                                                                                                                                                                                                                                     |                                              |                                               |                                                |                                              |                                            |   |                                    |    |                                            |   |                                                   |         |                               |       |    |   |                                                  |         |    |       |                                               |   |                                                  |       |                                                                  |       |    |    |                                    |       |    |       |    |   |                                    |       |    |       |    |   |                                  |        |    |       |    |   |                                  |        |    |       |    |     |
| 1                                                                                                                                                                                                                                                                                                                                                                                                                                                                                                                                                                                                      | 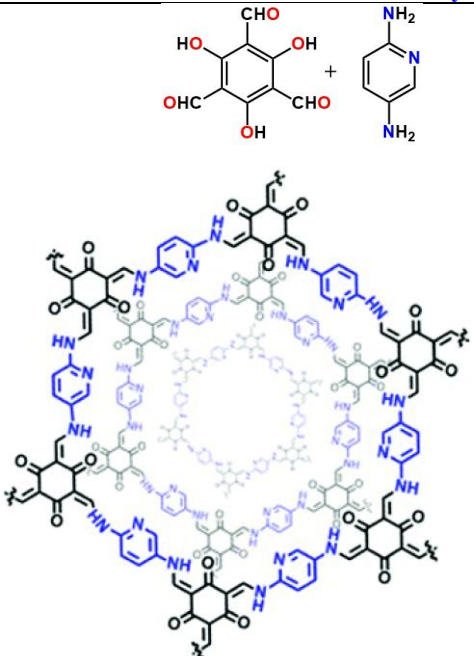   |  <p>Cascade oxidation-Knoevenagel reaction from benzyl alcohol to benzylidene malonitrile. Yield: 98% of benzylidene malonitrile.</p> <p>Pd/COF-TpPa-Py catalyzed cascade oxidation-Knoevenagel condensation reactions from alcohols to <math>\alpha,\beta</math>-unsaturated dinitriles<sup>a</sup></p> $R-CH_2OH \xrightarrow[t_1]{Pd} R-CHO \xrightarrow[t_2]{base} R-CH=C(CN)_2$ <table border="1" data-bbox="803 619 1331 871"> <thead> <tr> <th rowspan="2">Entry</th> <th rowspan="2">R</th> <th rowspan="2">Time (h)</th> <th colspan="3">Conv. (%)</th> </tr> <tr> <th>[t<sub>1</sub> + t<sub>2</sub>]</th> <th>A</th> <th>B C</th> </tr> </thead> <tbody> <tr> <td>1</td> <td>4-CH<sub>3</sub>O-C<sub>6</sub>H<sub>5</sub></td> <td>4 + 1.5</td> <td>99</td> <td>Trace</td> <td>99</td> </tr> <tr> <td>2</td> <td>4-CH<sub>3</sub>-C<sub>6</sub>H<sub>5</sub></td> <td>4 + 1.5</td> <td>98</td> <td>Trace</td> <td>97</td> </tr> <tr> <td>3</td> <td>4-NO<sub>2</sub>-C<sub>6</sub>H<sub>5</sub></td> <td>7 + 2</td> <td>92</td> <td>Trace</td> <td>91</td> </tr> <tr> <td>4</td> <td>4-Cl-C<sub>6</sub>H<sub>5</sub></td> <td>6 + 2</td> <td>96</td> <td>Trace</td> <td>94</td> </tr> <tr> <td>5</td> <td>3-Cl-C<sub>6</sub>H<sub>5</sub></td> <td>6 + 2</td> <td>93</td> <td>Trace</td> <td>93</td> </tr> <tr> <td>6</td> <td>n-C<sub>6</sub>H<sub>13</sub></td> <td>12 + 5</td> <td>91</td> <td>Trace</td> <td>91</td> </tr> <tr> <td>7</td> <td>n-C<sub>8</sub>H<sub>17</sub></td> <td>12 + 5</td> <td>94</td> <td>Trace</td> <td>93</td> </tr> </tbody> </table> <p><sup>a</sup> Reaction conditions: a mixture of alcohol (1 mmol), toluene (10 mL), and Pd/COF-TpPa-Py was stirred at 80 °C under O<sub>2</sub> (1 atm) for t<sub>1</sub> h and then malonitrile (1.05 mmol) was introduced, and the reaction continued for t<sub>2</sub> h.</p> | Entry                                        | R                                             | Time (h)                                       | Conv. (%)                                    |                                            |   | [t <sub>1</sub> + t <sub>2</sub> ] | A  | B C                                        | 1 | 4-CH <sub>3</sub> O-C <sub>6</sub> H <sub>5</sub> | 4 + 1.5 | 99                            | Trace | 99 | 2 | 4-CH <sub>3</sub> -C <sub>6</sub> H <sub>5</sub> | 4 + 1.5 | 98 | Trace | 97                                            | 3 | 4-NO <sub>2</sub> -C <sub>6</sub> H <sub>5</sub> | 7 + 2 | 92                                                               | Trace | 91 | 4  | 4-Cl-C <sub>6</sub> H <sub>5</sub> | 6 + 2 | 96 | Trace | 94 | 5 | 3-Cl-C <sub>6</sub> H <sub>5</sub> | 6 + 2 | 93 | Trace | 93 | 6 | n-C <sub>6</sub> H <sub>13</sub> | 12 + 5 | 91 | Trace | 91 | 7 | n-C <sub>8</sub> H <sub>17</sub> | 12 + 5 | 94 | Trace | 93 | S31 |
| Entry                                                                                                                                                                                                                                                                                                                                                                                                                                                                                                                                                                                                  | R                                                                                   | Time (h)                                                                                                                                                                                                                                                                                                                                                                                                                                                                                                                                                                                                                                                                                                                                                                                                                                                                                                                                                                                                                                                                                                                                                                                                                                                                                                                                                                                                                                                                                                                                                                                                                                                                                                                                                                                                                                                                                                                                            |                                              |                                               |                                                | Conv. (%)                                    |                                            |   |                                    |    |                                            |   |                                                   |         |                               |       |    |   |                                                  |         |    |       |                                               |   |                                                  |       |                                                                  |       |    |    |                                    |       |    |       |    |   |                                    |       |    |       |    |   |                                  |        |    |       |    |   |                                  |        |    |       |    |     |
|                                                                                                                                                                                                                                                                                                                                                                                                                                                                                                                                                                                                        |                                                                                     |                                                                                                                                                                                                                                                                                                                                                                                                                                                                                                                                                                                                                                                                                                                                                                                                                                                                                                                                                                                                                                                                                                                                                                                                                                                                                                                                                                                                                                                                                                                                                                                                                                                                                                                                                                                                                                                                                                                                                     | [t <sub>1</sub> + t <sub>2</sub> ]           | A                                             | B C                                            |                                              |                                            |   |                                    |    |                                            |   |                                                   |         |                               |       |    |   |                                                  |         |    |       |                                               |   |                                                  |       |                                                                  |       |    |    |                                    |       |    |       |    |   |                                    |       |    |       |    |   |                                  |        |    |       |    |   |                                  |        |    |       |    |     |
| 1                                                                                                                                                                                                                                                                                                                                                                                                                                                                                                                                                                                                      | 4-CH <sub>3</sub> O-C <sub>6</sub> H <sub>5</sub>                                   | 4 + 1.5                                                                                                                                                                                                                                                                                                                                                                                                                                                                                                                                                                                                                                                                                                                                                                                                                                                                                                                                                                                                                                                                                                                                                                                                                                                                                                                                                                                                                                                                                                                                                                                                                                                                                                                                                                                                                                                                                                                                             | 99                                           | Trace                                         | 99                                             |                                              |                                            |   |                                    |    |                                            |   |                                                   |         |                               |       |    |   |                                                  |         |    |       |                                               |   |                                                  |       |                                                                  |       |    |    |                                    |       |    |       |    |   |                                    |       |    |       |    |   |                                  |        |    |       |    |   |                                  |        |    |       |    |     |
| 2                                                                                                                                                                                                                                                                                                                                                                                                                                                                                                                                                                                                      | 4-CH <sub>3</sub> -C <sub>6</sub> H <sub>5</sub>                                    | 4 + 1.5                                                                                                                                                                                                                                                                                                                                                                                                                                                                                                                                                                                                                                                                                                                                                                                                                                                                                                                                                                                                                                                                                                                                                                                                                                                                                                                                                                                                                                                                                                                                                                                                                                                                                                                                                                                                                                                                                                                                             | 98                                           | Trace                                         | 97                                             |                                              |                                            |   |                                    |    |                                            |   |                                                   |         |                               |       |    |   |                                                  |         |    |       |                                               |   |                                                  |       |                                                                  |       |    |    |                                    |       |    |       |    |   |                                    |       |    |       |    |   |                                  |        |    |       |    |   |                                  |        |    |       |    |     |
| 3                                                                                                                                                                                                                                                                                                                                                                                                                                                                                                                                                                                                      | 4-NO <sub>2</sub> -C <sub>6</sub> H <sub>5</sub>                                    | 7 + 2                                                                                                                                                                                                                                                                                                                                                                                                                                                                                                                                                                                                                                                                                                                                                                                                                                                                                                                                                                                                                                                                                                                                                                                                                                                                                                                                                                                                                                                                                                                                                                                                                                                                                                                                                                                                                                                                                                                                               | 92                                           | Trace                                         | 91                                             |                                              |                                            |   |                                    |    |                                            |   |                                                   |         |                               |       |    |   |                                                  |         |    |       |                                               |   |                                                  |       |                                                                  |       |    |    |                                    |       |    |       |    |   |                                    |       |    |       |    |   |                                  |        |    |       |    |   |                                  |        |    |       |    |     |
| 4                                                                                                                                                                                                                                                                                                                                                                                                                                                                                                                                                                                                      | 4-Cl-C <sub>6</sub> H <sub>5</sub>                                                  | 6 + 2                                                                                                                                                                                                                                                                                                                                                                                                                                                                                                                                                                                                                                                                                                                                                                                                                                                                                                                                                                                                                                                                                                                                                                                                                                                                                                                                                                                                                                                                                                                                                                                                                                                                                                                                                                                                                                                                                                                                               | 96                                           | Trace                                         | 94                                             |                                              |                                            |   |                                    |    |                                            |   |                                                   |         |                               |       |    |   |                                                  |         |    |       |                                               |   |                                                  |       |                                                                  |       |    |    |                                    |       |    |       |    |   |                                    |       |    |       |    |   |                                  |        |    |       |    |   |                                  |        |    |       |    |     |
| 5                                                                                                                                                                                                                                                                                                                                                                                                                                                                                                                                                                                                      | 3-Cl-C <sub>6</sub> H <sub>5</sub>                                                  | 6 + 2                                                                                                                                                                                                                                                                                                                                                                                                                                                                                                                                                                                                                                                                                                                                                                                                                                                                                                                                                                                                                                                                                                                                                                                                                                                                                                                                                                                                                                                                                                                                                                                                                                                                                                                                                                                                                                                                                                                                               | 93                                           | Trace                                         | 93                                             |                                              |                                            |   |                                    |    |                                            |   |                                                   |         |                               |       |    |   |                                                  |         |    |       |                                               |   |                                                  |       |                                                                  |       |    |    |                                    |       |    |       |    |   |                                    |       |    |       |    |   |                                  |        |    |       |    |   |                                  |        |    |       |    |     |
| 6                                                                                                                                                                                                                                                                                                                                                                                                                                                                                                                                                                                                      | n-C <sub>6</sub> H <sub>13</sub>                                                    | 12 + 5                                                                                                                                                                                                                                                                                                                                                                                                                                                                                                                                                                                                                                                                                                                                                                                                                                                                                                                                                                                                                                                                                                                                                                                                                                                                                                                                                                                                                                                                                                                                                                                                                                                                                                                                                                                                                                                                                                                                              | 91                                           | Trace                                         | 91                                             |                                              |                                            |   |                                    |    |                                            |   |                                                   |         |                               |       |    |   |                                                  |         |    |       |                                               |   |                                                  |       |                                                                  |       |    |    |                                    |       |    |       |    |   |                                    |       |    |       |    |   |                                  |        |    |       |    |   |                                  |        |    |       |    |     |
| 7                                                                                                                                                                                                                                                                                                                                                                                                                                                                                                                                                                                                      | n-C <sub>8</sub> H <sub>17</sub>                                                    | 12 + 5                                                                                                                                                                                                                                                                                                                                                                                                                                                                                                                                                                                                                                                                                                                                                                                                                                                                                                                                                                                                                                                                                                                                                                                                                                                                                                                                                                                                                                                                                                                                                                                                                                                                                                                                                                                                                                                                                                                                              | 94                                           | Trace                                         | 93                                             |                                              |                                            |   |                                    |    |                                            |   |                                                   |         |                               |       |    |   |                                                  |         |    |       |                                               |   |                                                  |       |                                                                  |       |    |    |                                    |       |    |       |    |   |                                    |       |    |       |    |   |                                  |        |    |       |    |   |                                  |        |    |       |    |     |
| COF-TpPa-Py: BET SA <b>1019 m<sup>2</sup>/g</b> and pore size is <b>1.5 nm</b> . ICP: Pd loading in Pd/COF-TpPa-Py = <b>4.1</b> and in Pd/POP-Py = <b>3.9 wt%</b> . Active species: <b>Pd(0)</b> . Reprinted with the permission from the Royal Society of Chemistry (reference S31).                                                                                                                                                                                                                                                                                                                  |                                                                                     |                                                                                                                                                                                                                                                                                                                                                                                                                                                                                                                                                                                                                                                                                                                                                                                                                                                                                                                                                                                                                                                                                                                                                                                                                                                                                                                                                                                                                                                                                                                                                                                                                                                                                                                                                                                                                                                                                                                                                     |                                              |                                               |                                                |                                              |                                            |   |                                    |    |                                            |   |                                                   |         |                               |       |    |   |                                                  |         |    |       |                                               |   |                                                  |       |                                                                  |       |    |    |                                    |       |    |       |    |   |                                    |       |    |       |    |   |                                  |        |    |       |    |   |                                  |        |    |       |    |     |
| 2                                                                                                                                                                                                                                                                                                                                                                                                                                                                                                                                                                                                      |  |  <p>Rh/Pd containing COF catalyses both the steps with &gt;90% yields.</p> <table border="1" data-bbox="787 1291 1502 1596"> <thead> <tr> <th>Catalyst</th> <th>Yield of addition reaction [%]<sup>[a]</sup></th> <th>Yield of oxidation reaction [%]<sup>[b]</sup></th> <th>Yield of cascade reaction [%]<sup>[c]</sup></th> </tr> </thead> <tbody> <tr> <td>Rh/Pd<sup>0</sup>@75 % BPy COF 4th cycle</td> <td>–</td> <td>–</td> <td>87</td> </tr> <tr> <td>Rh/Pd<sup>0</sup>@75 % BPy COF 5th cycle</td> <td>–</td> <td>–</td> <td>85</td> </tr> <tr> <td>Rh<sup>I</sup>@75 % BPy COF</td> <td>88</td> <td>0</td> <td>0</td> </tr> <tr> <td>Pd<sup>0</sup>@75 % BPy COF</td> <td>0</td> <td>99</td> <td>0</td> </tr> <tr> <td>Rh(COD)Cl+Pd(OAc)<sub>2</sub><sup>[d]</sup></td> <td>–</td> <td>–</td> <td>3</td> </tr> <tr> <td>Rh(COD)Cl+Pd(OAc)<sub>2</sub>+bipyridine ligand<sup>[f]</sup></td> <td>–</td> <td>–</td> <td>99</td> </tr> </tbody> </table> <p>[a] Phenylboronic acid (2.0 mmol), benzaldehyde (1.0 mmol), potassium carbonate (3.0 mmol), catalyst (containing 0.01 mmol metal), toluene/H<sub>2</sub>O (15 mL/5 mL), 120 °C, 24 h, N<sub>2</sub> protection. [b] Diphenylmethanol (1.0 mmol), potassium carbonate (3.0 mmol), catalyst (containing 0.01 mmol of metal), toluene/H<sub>2</sub>O (15 mL/5 mL), ambient air, 100 °C, 12 h. [c] After the addition reaction, the temperature was decreased to 100 °C and O<sub>2</sub> was purged. [d] The catalyst was filtered and reused. [e] Rh(COD)Cl (0.01 mmol) and Pd(OAc)<sub>2</sub> (0.01 mmol) as homogeneous catalyst. [f] Rh(COD)Cl (0.01 mmol), Pd(OAc)<sub>2</sub> (0.01 mmol), and bipyridine ligand (0.02 mmol) as homogeneous catalyst.</p>                                                                                                                                  | Catalyst                                     | Yield of addition reaction [%] <sup>[a]</sup> | Yield of oxidation reaction [%] <sup>[b]</sup> | Yield of cascade reaction [%] <sup>[c]</sup> | Rh/Pd <sup>0</sup> @75 % BPy COF 4th cycle | – | –                                  | 87 | Rh/Pd <sup>0</sup> @75 % BPy COF 5th cycle | – | –                                                 | 85      | Rh <sup>I</sup> @75 % BPy COF | 88    | 0  | 0 | Pd <sup>0</sup> @75 % BPy COF                    | 0       | 99 | 0     | Rh(COD)Cl+Pd(OAc) <sub>2</sub> <sup>[d]</sup> | – | –                                                | 3     | Rh(COD)Cl+Pd(OAc) <sub>2</sub> +bipyridine ligand <sup>[f]</sup> | –     | –  | 99 | S32                                |       |    |       |    |   |                                    |       |    |       |    |   |                                  |        |    |       |    |   |                                  |        |    |       |    |     |
| Catalyst                                                                                                                                                                                                                                                                                                                                                                                                                                                                                                                                                                                               | Yield of addition reaction [%] <sup>[a]</sup>                                       | Yield of oxidation reaction [%] <sup>[b]</sup>                                                                                                                                                                                                                                                                                                                                                                                                                                                                                                                                                                                                                                                                                                                                                                                                                                                                                                                                                                                                                                                                                                                                                                                                                                                                                                                                                                                                                                                                                                                                                                                                                                                                                                                                                                                                                                                                                                      | Yield of cascade reaction [%] <sup>[c]</sup> |                                               |                                                |                                              |                                            |   |                                    |    |                                            |   |                                                   |         |                               |       |    |   |                                                  |         |    |       |                                               |   |                                                  |       |                                                                  |       |    |    |                                    |       |    |       |    |   |                                    |       |    |       |    |   |                                  |        |    |       |    |   |                                  |        |    |       |    |     |
| Rh/Pd <sup>0</sup> @75 % BPy COF 4th cycle                                                                                                                                                                                                                                                                                                                                                                                                                                                                                                                                                             | –                                                                                   | –                                                                                                                                                                                                                                                                                                                                                                                                                                                                                                                                                                                                                                                                                                                                                                                                                                                                                                                                                                                                                                                                                                                                                                                                                                                                                                                                                                                                                                                                                                                                                                                                                                                                                                                                                                                                                                                                                                                                                   | 87                                           |                                               |                                                |                                              |                                            |   |                                    |    |                                            |   |                                                   |         |                               |       |    |   |                                                  |         |    |       |                                               |   |                                                  |       |                                                                  |       |    |    |                                    |       |    |       |    |   |                                    |       |    |       |    |   |                                  |        |    |       |    |   |                                  |        |    |       |    |     |
| Rh/Pd <sup>0</sup> @75 % BPy COF 5th cycle                                                                                                                                                                                                                                                                                                                                                                                                                                                                                                                                                             | –                                                                                   | –                                                                                                                                                                                                                                                                                                                                                                                                                                                                                                                                                                                                                                                                                                                                                                                                                                                                                                                                                                                                                                                                                                                                                                                                                                                                                                                                                                                                                                                                                                                                                                                                                                                                                                                                                                                                                                                                                                                                                   | 85                                           |                                               |                                                |                                              |                                            |   |                                    |    |                                            |   |                                                   |         |                               |       |    |   |                                                  |         |    |       |                                               |   |                                                  |       |                                                                  |       |    |    |                                    |       |    |       |    |   |                                    |       |    |       |    |   |                                  |        |    |       |    |   |                                  |        |    |       |    |     |
| Rh <sup>I</sup> @75 % BPy COF                                                                                                                                                                                                                                                                                                                                                                                                                                                                                                                                                                          | 88                                                                                  | 0                                                                                                                                                                                                                                                                                                                                                                                                                                                                                                                                                                                                                                                                                                                                                                                                                                                                                                                                                                                                                                                                                                                                                                                                                                                                                                                                                                                                                                                                                                                                                                                                                                                                                                                                                                                                                                                                                                                                                   | 0                                            |                                               |                                                |                                              |                                            |   |                                    |    |                                            |   |                                                   |         |                               |       |    |   |                                                  |         |    |       |                                               |   |                                                  |       |                                                                  |       |    |    |                                    |       |    |       |    |   |                                    |       |    |       |    |   |                                  |        |    |       |    |   |                                  |        |    |       |    |     |
| Pd <sup>0</sup> @75 % BPy COF                                                                                                                                                                                                                                                                                                                                                                                                                                                                                                                                                                          | 0                                                                                   | 99                                                                                                                                                                                                                                                                                                                                                                                                                                                                                                                                                                                                                                                                                                                                                                                                                                                                                                                                                                                                                                                                                                                                                                                                                                                                                                                                                                                                                                                                                                                                                                                                                                                                                                                                                                                                                                                                                                                                                  | 0                                            |                                               |                                                |                                              |                                            |   |                                    |    |                                            |   |                                                   |         |                               |       |    |   |                                                  |         |    |       |                                               |   |                                                  |       |                                                                  |       |    |    |                                    |       |    |       |    |   |                                    |       |    |       |    |   |                                  |        |    |       |    |   |                                  |        |    |       |    |     |
| Rh(COD)Cl+Pd(OAc) <sub>2</sub> <sup>[d]</sup>                                                                                                                                                                                                                                                                                                                                                                                                                                                                                                                                                          | –                                                                                   | –                                                                                                                                                                                                                                                                                                                                                                                                                                                                                                                                                                                                                                                                                                                                                                                                                                                                                                                                                                                                                                                                                                                                                                                                                                                                                                                                                                                                                                                                                                                                                                                                                                                                                                                                                                                                                                                                                                                                                   | 3                                            |                                               |                                                |                                              |                                            |   |                                    |    |                                            |   |                                                   |         |                               |       |    |   |                                                  |         |    |       |                                               |   |                                                  |       |                                                                  |       |    |    |                                    |       |    |       |    |   |                                    |       |    |       |    |   |                                  |        |    |       |    |   |                                  |        |    |       |    |     |
| Rh(COD)Cl+Pd(OAc) <sub>2</sub> +bipyridine ligand <sup>[f]</sup>                                                                                                                                                                                                                                                                                                                                                                                                                                                                                                                                       | –                                                                                   | –                                                                                                                                                                                                                                                                                                                                                                                                                                                                                                                                                                                                                                                                                                                                                                                                                                                                                                                                                                                                                                                                                                                                                                                                                                                                                                                                                                                                                                                                                                                                                                                                                                                                                                                                                                                                                                                                                                                                                   | 99                                           |                                               |                                                |                                              |                                            |   |                                    |    |                                            |   |                                                   |         |                               |       |    |   |                                                  |         |    |       |                                               |   |                                                  |       |                                                                  |       |    |    |                                    |       |    |       |    |   |                                    |       |    |       |    |   |                                  |        |    |       |    |   |                                  |        |    |       |    |     |
| Mixed building blocks are used to fabricate different COFs. The BET surface areas range from <b>500 to 1300 m<sup>2</sup>/g</b> . Rh is in (I) and Pd is in (II) oxidation states. ICP-OES: Rh loadings were <b>4.9, 7.8, 7.5 and 7.9 wt%</b> , for systematically varying concentration ( <b>25, 50, 75 and 100</b> ) of 2,2'-bpy unit in the COF. ICP-OES: Pd loading was <b>8.5, 9.1, 8.0 and 10.7 wt%</b> with X values of <b>25, 50, 75 and 100</b> , respectively. Active species: <b>Rh(I)</b> and <b>Pd(II)</b> . Reprinted with the permission from the Wiley Online Library (reference S32). |                                                                                     |                                                                                                                                                                                                                                                                                                                                                                                                                                                                                                                                                                                                                                                                                                                                                                                                                                                                                                                                                                                                                                                                                                                                                                                                                                                                                                                                                                                                                                                                                                                                                                                                                                                                                                                                                                                                                                                                                                                                                     |                                              |                                               |                                                |                                              |                                            |   |                                    |    |                                            |   |                                                   |         |                               |       |    |   |                                                  |         |    |       |                                               |   |                                                  |       |                                                                  |       |    |    |                                    |       |    |       |    |   |                                    |       |    |       |    |   |                                  |        |    |       |    |   |                                  |        |    |       |    |     |



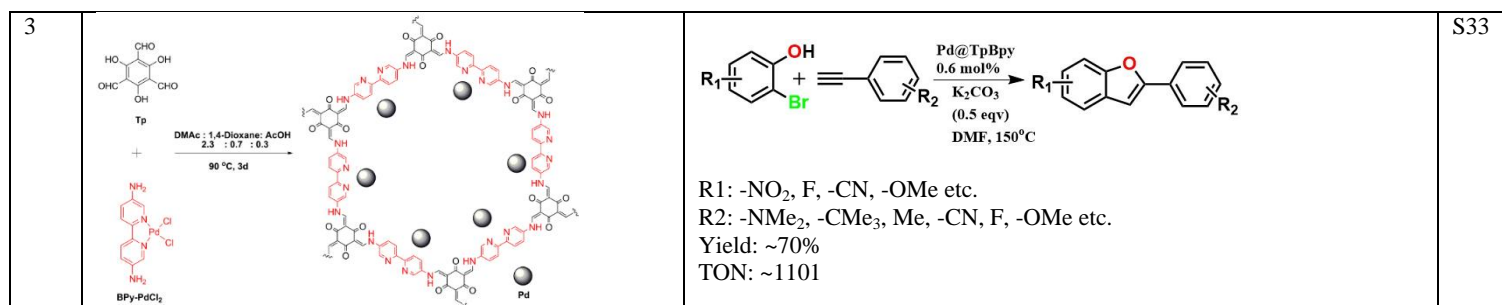

Code: TpBpy. Bpy-PdCl<sub>2</sub> building block generates Pd nano particles in-situ during the COF formation. Surface area of TpBpy: **1462 m<sup>2</sup>/g**. Pd@TpBpy: **653 m<sup>2</sup>/g**. Average particle size: **12 ± 4 nm**. ICP-OES: Pd loading = **15.2 wt%**. Active species: **Pd(II)**. Reprinted with the permission from the American Chemical Society (reference S33).

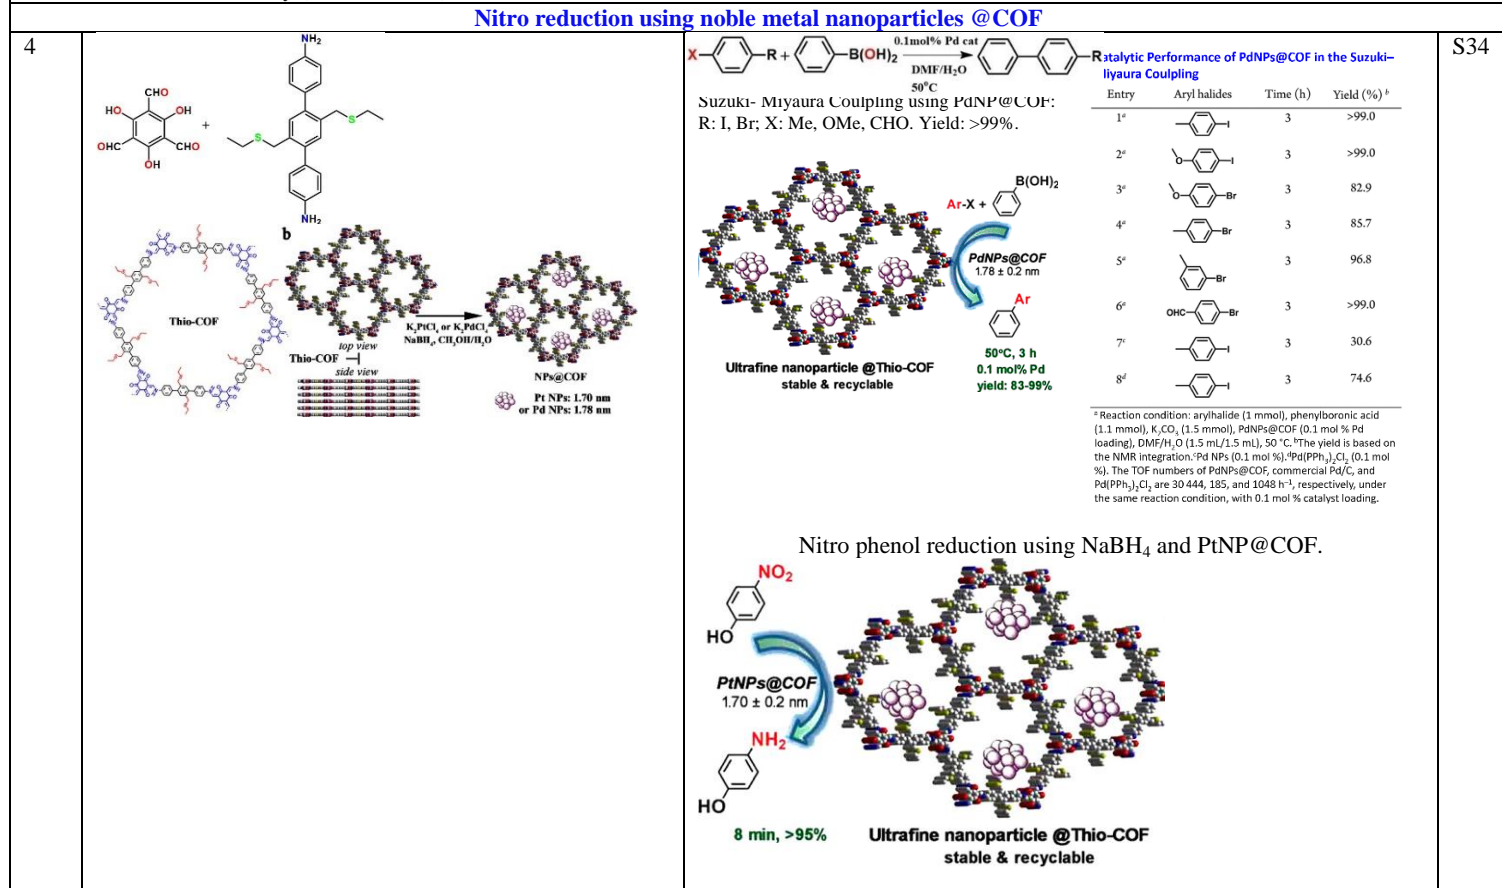

The COF (Thio-COF) has relatively small surface area (**50 m<sup>2</sup>/g**). The theoretical pore size is **2.4 nm**. The pore is decorated with thiol groups which are helping to grow ultra-small Pt and Pd nps (**< 2 nm**). From ICP: Pt loading= **34.36 wt %**; Pd loading= **26.30 wt %**; Active species: **Pd(0)**. Reprinted with the permission from the American Chemical Society (reference S34).

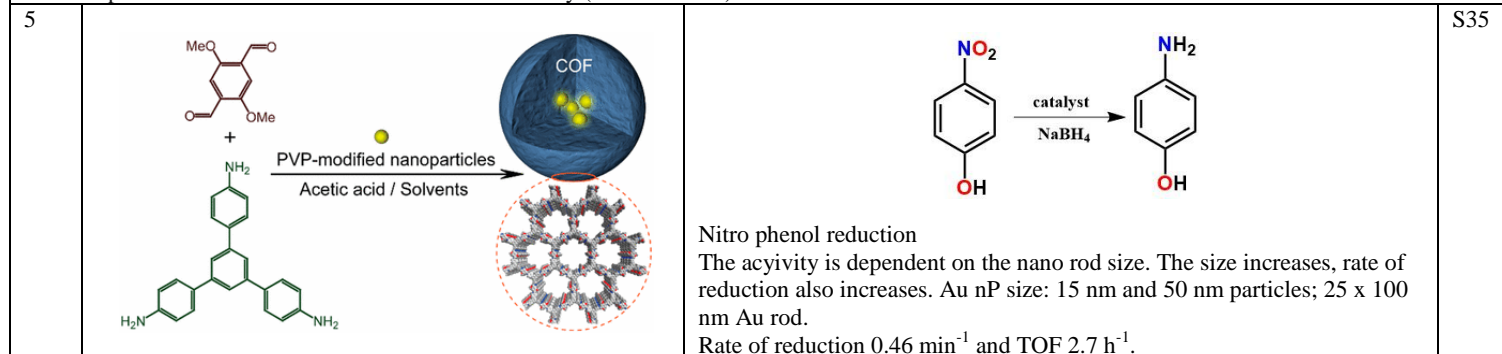

PVP modified Au nano-rods with different sizes are grown in the COF during synthesis. BET surface areas are greater than **2000 m<sup>2</sup>/g** for the COF and Au nano-rod incorporated COFs. ICP: **0.2 wt%** loading for 15 nm Au; **0.26 wt%** for Au rods; **0.38 wt%** for 50 nm Au particles. Active species: **Au(0)**. Reprinted with the permission from the American Chemical Society (reference S35).

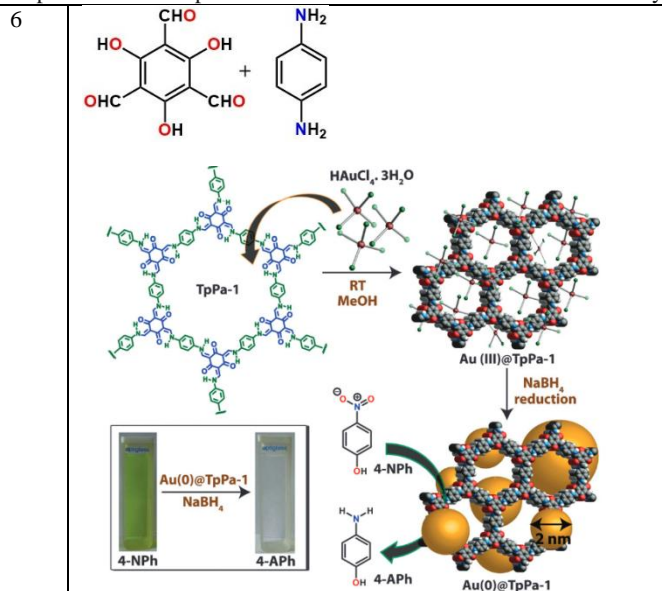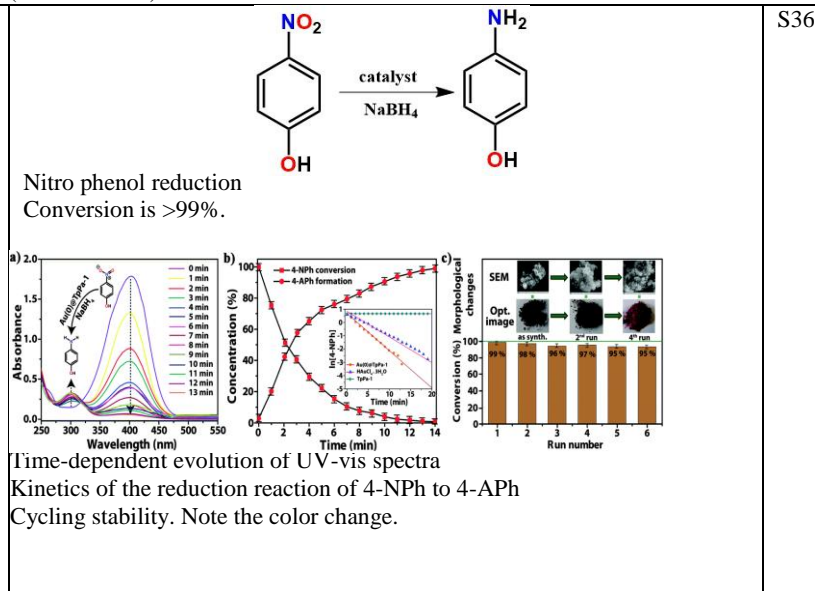

BET surface area: TpPa-1: **484 m<sup>2</sup>/g** and Au@TpPa-1 is **339 m<sup>2</sup>/g**. The particle size distribution is **5 ± 3 nm**. Active species: **Au(0)**. Reprinted with the permission from the Royal Society of Chemistry (reference S36).

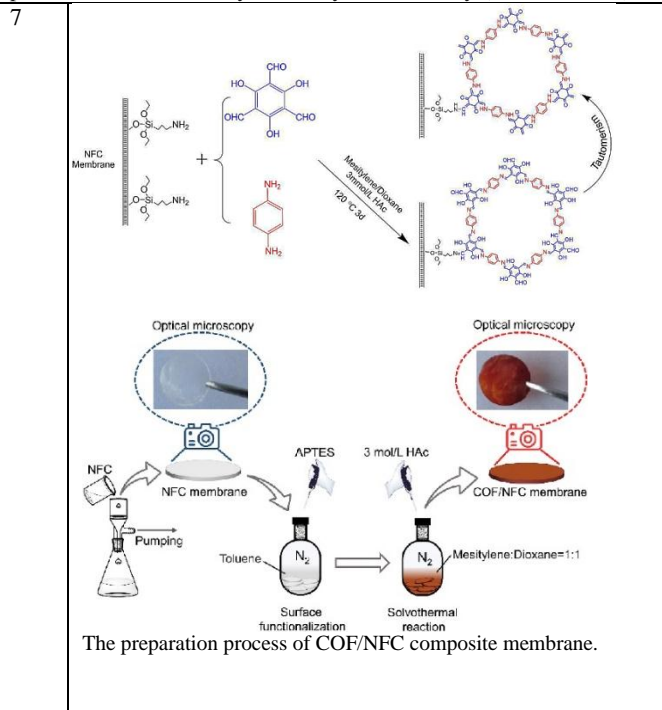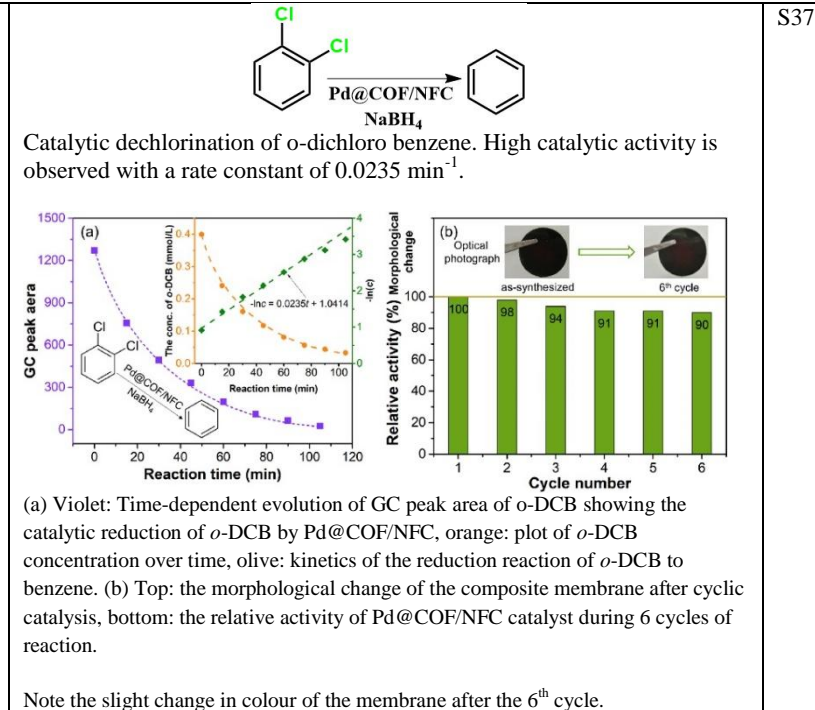

Nanofibrillated Cellulose is blended with COF. The composite has BET surface area **357 m<sup>2</sup>/g**, pore size **2-20 nm** and the thickness of the membrane is **250 nm**. EDAX: **12.62%** of Pd loaded in the COF-NFC composite. Active species: **Pd(0)**. Reprinted with the permission from the Elsevier (reference S37).

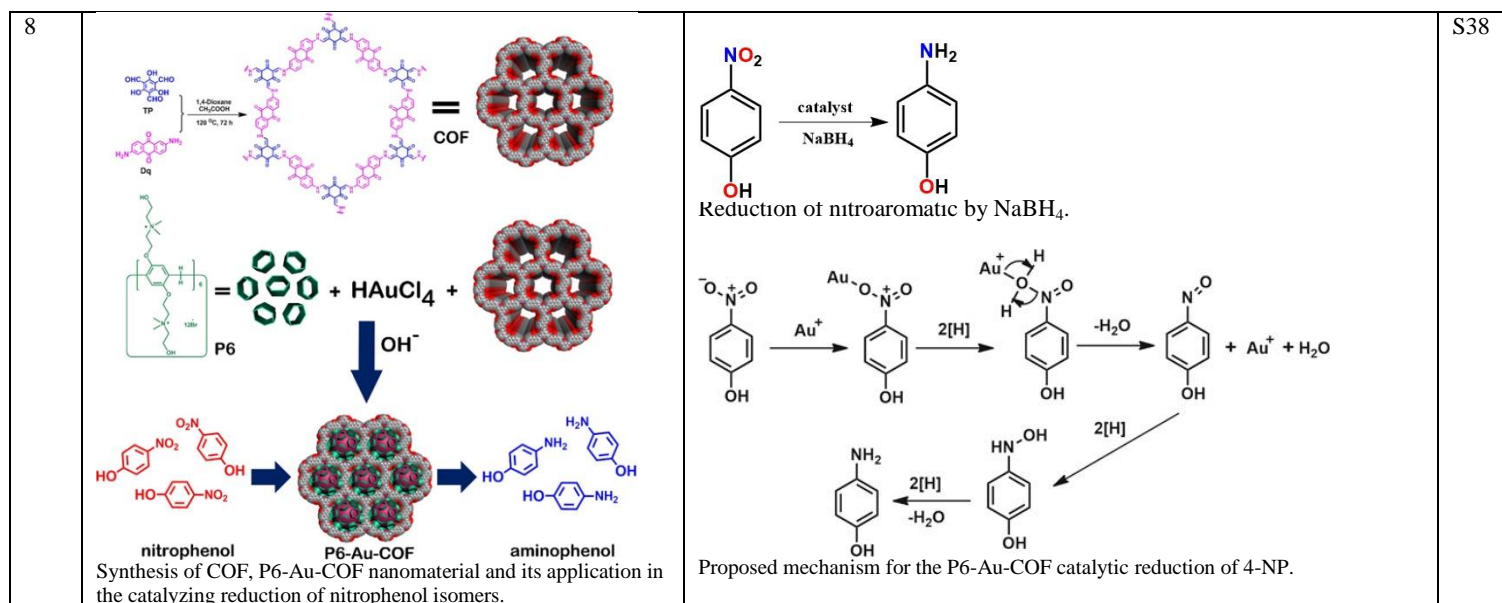

BET SA for COF is **685 m<sup>2</sup>/g** and pillar[6]arene containing COF has **328 m<sup>2</sup>/g** surface area. Average size of the Au is **2-3 nm**. Active species: **Au(0)**. Reprinted with the permission from the IOP Science (reference S38).

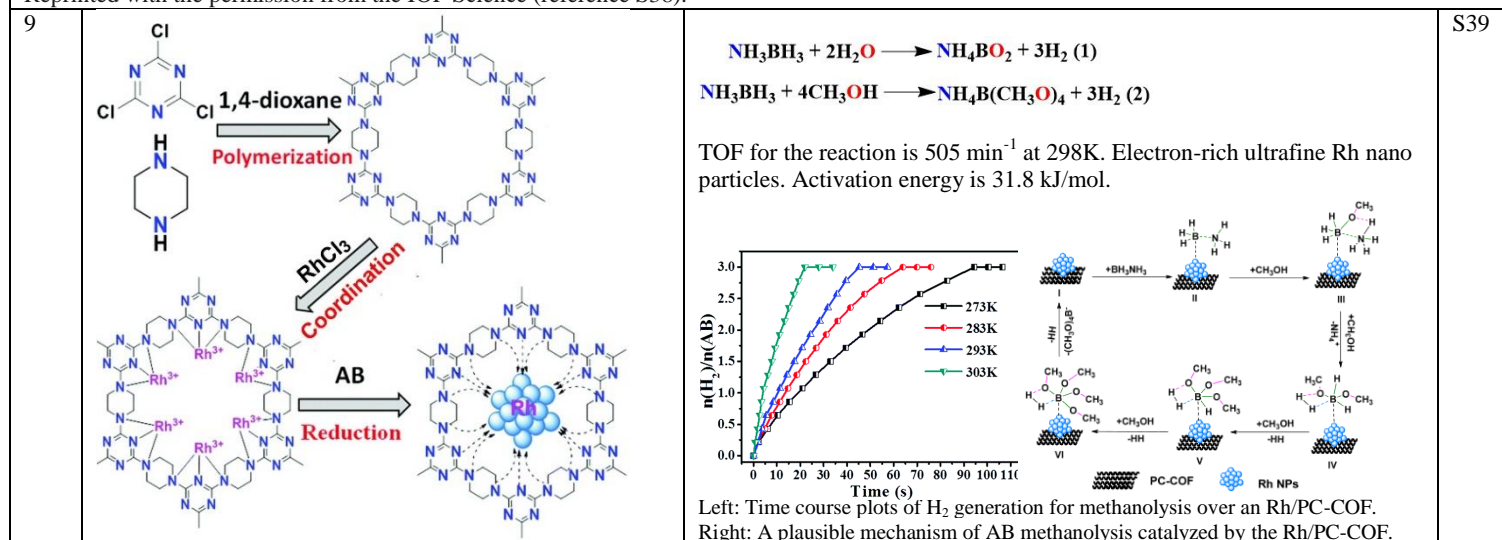

BET SA of the PC-COF is **389 m<sup>2</sup>/g** and Rh/PC-COF is **268 m<sup>2</sup>/g**. Pore size **3.5-3.7 nm** for both the materials. Average particle size of Rh nano particle is **2±0.4 nm**. ICP: **0.96 wt%** Rh loading. Active species: **Rh(0)**. Reprinted with the permission from the Royal Society Chemistry (reference S39).

10

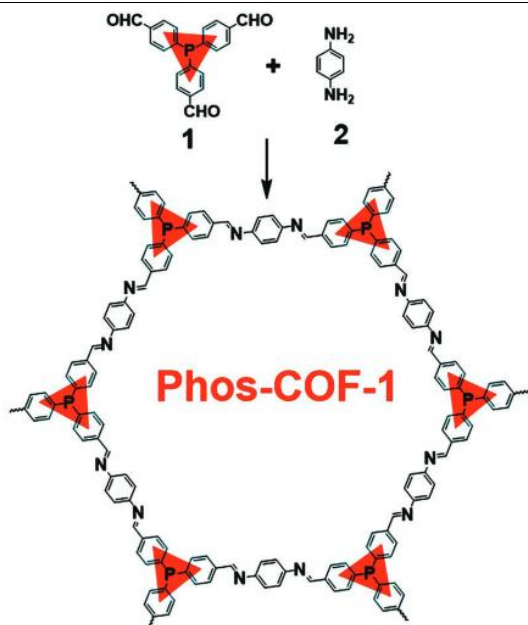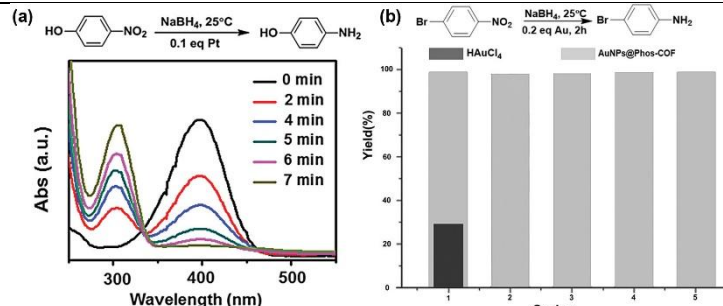

(a) The time-dependent UV-vis spectra of 4-nitrophenol reduction catalyzed by 0.1 eq. PtNPs@Phos-COF-1. (b) Catalytic performance of Au catalyst (0.2 eq) in the reduction reaction.

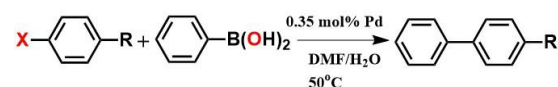

Suzuki-Miyaura coupling reaction. R: Me, OMe, NO<sub>2</sub>, CHO and X: I, Br. Yield >99%. TOF is 155-1648 h<sup>-1</sup> for the Suzuki-Miyaura coupling reaction.

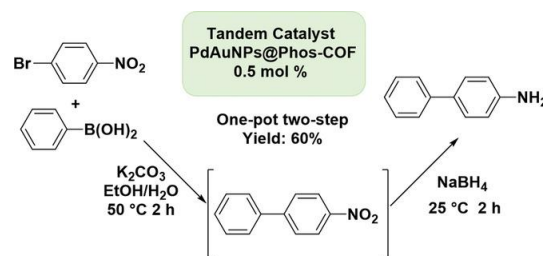

The one-pot two-step tandem cross-coupling and hydride reduction under the catalysis of PdAuNPs@Phos-COF-1.

S40

BET surface area: **818 m<sup>2</sup>/g** (pore size: **1.56 nm**). A broad scope of growing small-sized nano particles is studied. Average particle sizes: PdNPs@Phos-COF-1 = **1.62±0.37 nm**, PtNPs@Phos-COF-1 = **2.06±0.54 nm**, AuNPs@Phos-COF-1 = **1.78±0.32 nm** and PdAuNPs@Phos-COF-1 = **1.03±0.07 nm**. PPh<sub>3</sub> core helps to generate small-sized nano clusters in the COF. ICP: The Pd, Pt, and Au contents were **2.8%**, **3.2%**, and **12.5 wt%**, respectively. Active species: **Pd(0)**, **Pt(0)** and **Au(0)**. Reprinted with the permission from the Wiley Online Library (reference S40).

11

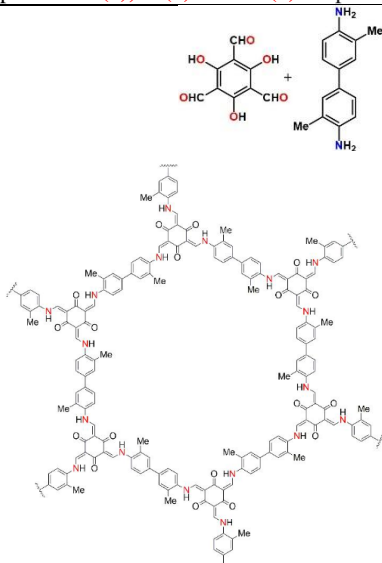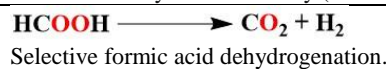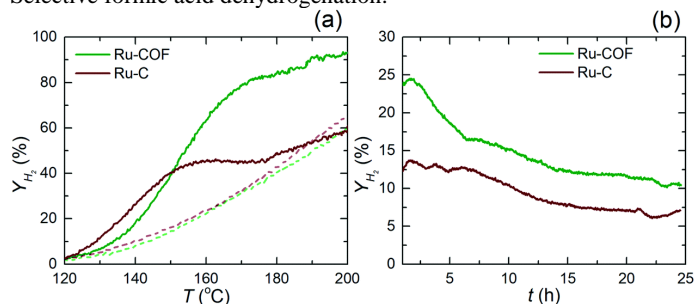

Comparison of the catalytic performance of the synthesized **Ru-COF** and commercial **Ru-C** control catalyst in the dehydrogenation of FA. Light-off curves for (a) H<sub>2</sub> yield (Y<sub>H<sub>2</sub></sub>) as a function of reaction temperature; (b) stability test performed at 120 °C for 25 h, monitoring Y<sub>H<sub>2</sub></sub> as a function of time.

S41

BET SA of TpBD-Me<sub>2</sub> COF is **520 m<sup>2</sup>/g** (pore size **1 nm**) and Ru-COF **630 m<sup>2</sup>/g** (pore size **1.3 nm**). During reaction, the RuO<sub>2</sub> nps are reduced to Ru nps. Average particle size of Ru is **~1.2nm**. ICP-OES: Ru loading is **2.4%**. Active species: **Ru(IV)**, **Ru(0)**. Reprinted with the permission from the Royal Society of Chemistry (reference S41).



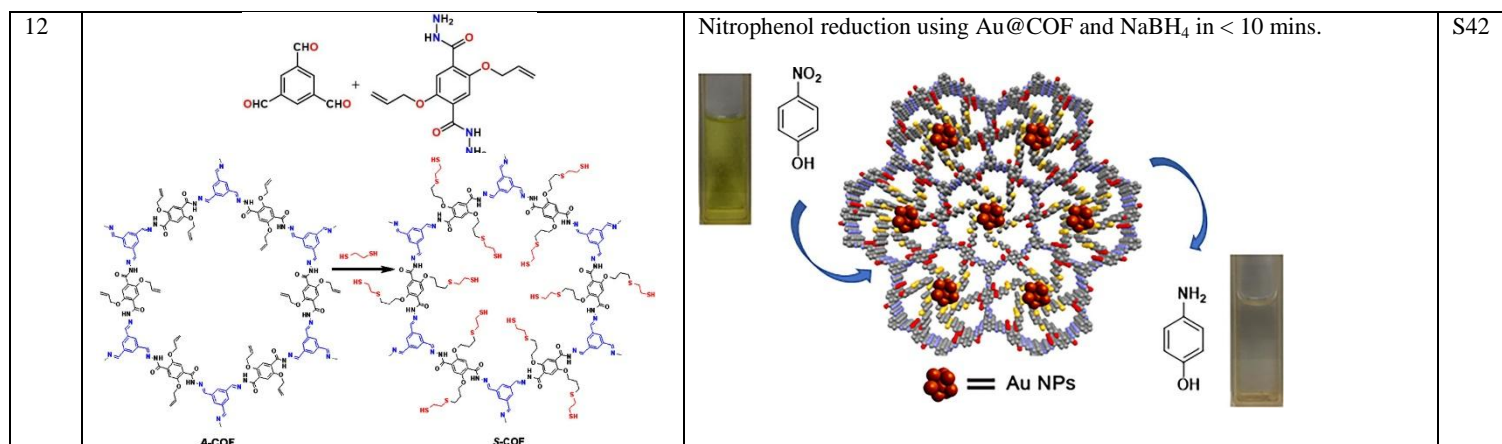

Thiol decorated COF helps to grow small-sized Au nano particles. BET SA of A-COF and S-COF are **82** and **31 m<sup>2</sup>/g**. The pore size of A-COF is **19 Å**. Au nanoparticle average particle size = **4.2 nm**. Atomic Absorption Spectroscopy (AAS): **24 wt%** Au loaded in COF. Active species: **Au(0)**. Reprinted with the permission from the Elsevier (reference S42).

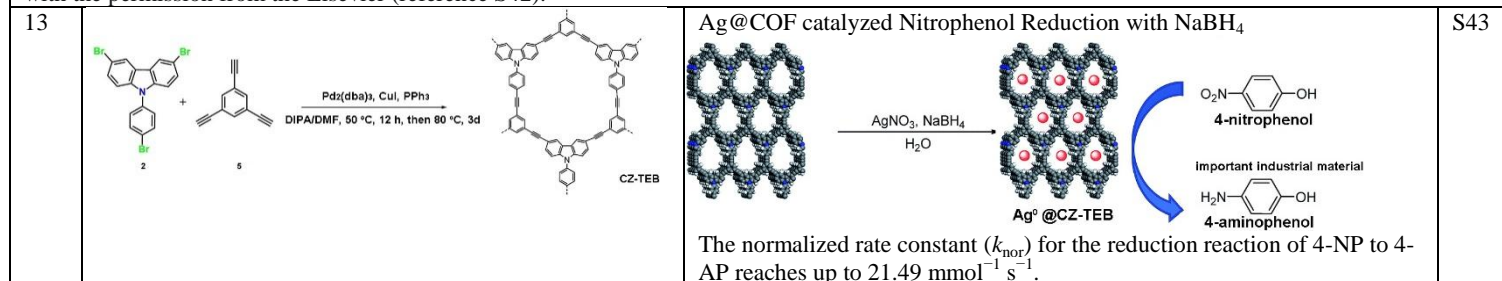

Covalent Carbazole framework with BET surface area of **1600 m<sup>2</sup>/g**. The CZ-TEB has hierarchical porosity ranging from **1** to **10 nm**. Ag(0) nanoparticles have an average size of **2-4 nm**. ICP-AES: Ag loading = **5.1 wt%**. Active species: **Ag(0)**. Reprinted with the permission from the Royal Society of Chemistry (reference S43).

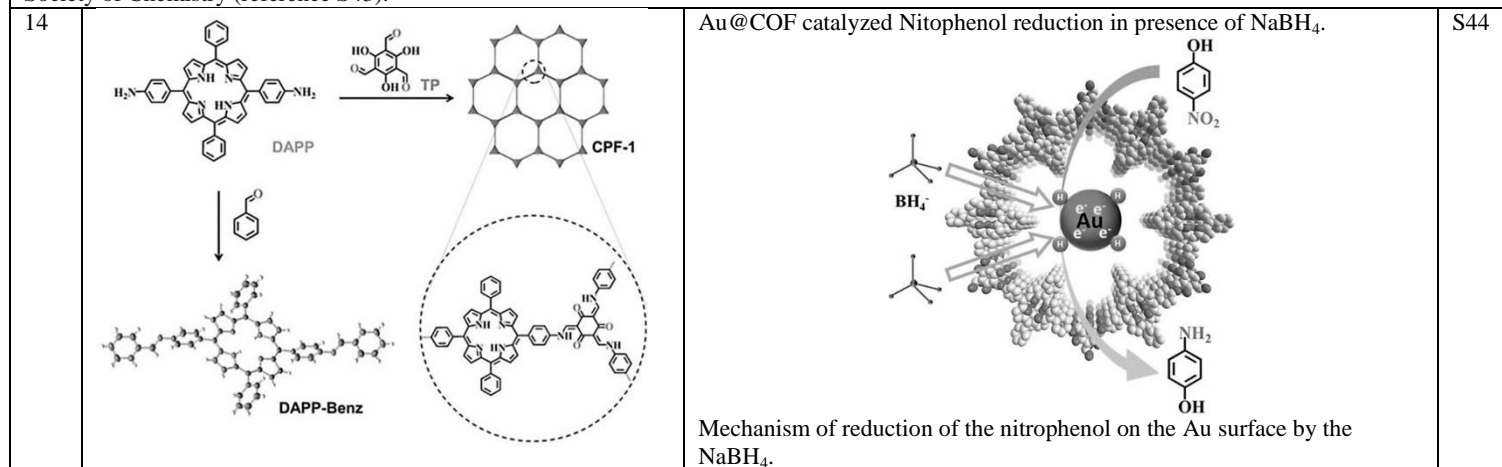

BET surface areas of CPF-1 (pore size **10-30 Å**) and Au@CPF-1 (pore size **8-25 Å**) are **192** and **150 m<sup>2</sup>/g**. Average particle size of Au nano particles is **4-7 nm**. EDAX: **1.2 wt%** of Au loaded in COF. ICP-OES: **1.24 wt%** of Au in COF. Active species: **Au(0)**. Reprinted with the permission from the Wiley Online Library (reference S44).

### Suzuki- Miyaura Coupling

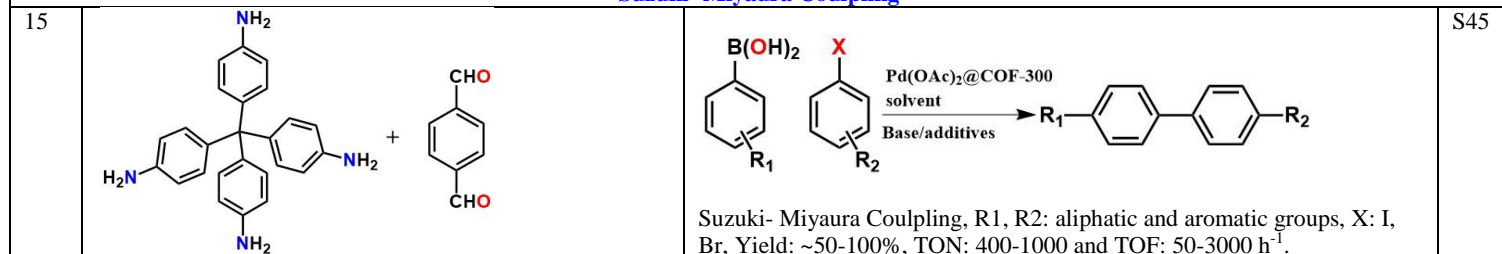

|                                                                                                                                                                                                                                                                                                                                                                                                                                                                                                                                  |                                                                                                                                                                                                                               |                                                                                                                                                                                                                                                                                                                                                                                                                                                                                                                                                                                                                                                                                                                                                                                                                                                                                                                 |     |
|----------------------------------------------------------------------------------------------------------------------------------------------------------------------------------------------------------------------------------------------------------------------------------------------------------------------------------------------------------------------------------------------------------------------------------------------------------------------------------------------------------------------------------|-------------------------------------------------------------------------------------------------------------------------------------------------------------------------------------------------------------------------------|-----------------------------------------------------------------------------------------------------------------------------------------------------------------------------------------------------------------------------------------------------------------------------------------------------------------------------------------------------------------------------------------------------------------------------------------------------------------------------------------------------------------------------------------------------------------------------------------------------------------------------------------------------------------------------------------------------------------------------------------------------------------------------------------------------------------------------------------------------------------------------------------------------------------|-----|
|                                                                                                                                                                                                                                                                                                                                                                                                                                                                                                                                  | 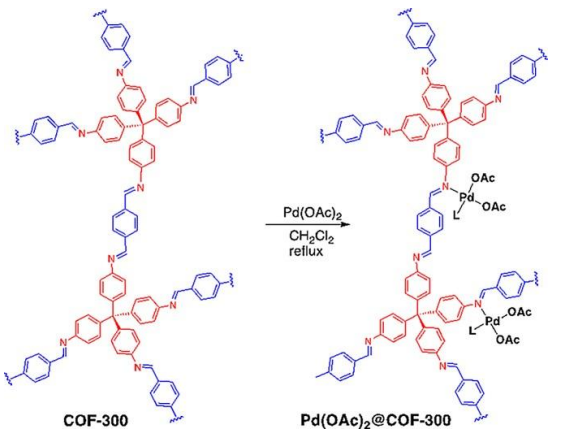 <p><b>COF-300</b> <math>\xrightarrow[\text{reflux}]{\text{Pd(OAc)}_2, \text{CH}_2\text{Cl}_2}</math> <b>Pd(OAc)<sub>2</sub>@COF-300</b></p> |  <p><b>a) Selectivity</b><br/><b>Conversion</b></p> <p><b>Operation time (min)</b></p> <p>Continuous-flow Suzuki-Miyaura cross-coupling reaction employing Pd(OAc)<sub>2</sub>@COF300 as heterogeneous catalyst. Bromobenzene (squares) conversion to biphenyl (circles) as a function of time on stream. Inset shows the HRTEM image displaying the &lt; 2 nm Pd(0) nPs.</p>                                                                                                                                                                                                                                                                                                                                                                                                                                                 |     |
| <p>BET SA: <b>1373 m<sup>2</sup>/g</b> (for COF-300), <b>270 m<sup>2</sup>/g</b> (for Pd(OAc)<sub>2</sub>@COF-300). From ICP-MS: Pd loading = <b>85 ppb</b>. Active species: <b>Pd(II) -&gt; Pd(0)</b>. Reprinted with the permission from the Wiley Online Library (reference S45).</p>                                                                                                                                                                                                                                         |                                                                                                                                                                                                                               |                                                                                                                                                                                                                                                                                                                                                                                                                                                                                                                                                                                                                                                                                                                                                                                                                                                                                                                 |     |
| 16                                                                                                                                                                                                                                                                                                                                                                                                                                                                                                                               |  <p>TAT-DHBD (1), Pd(II)/TAT-DHBD (3), Pd(0)/TAT-DHBD (5)<br/>TAT-TFP (2), Pd(II)/TAT-TFP (4), Pd(0)/TAT-TFP (6)</p>                        | <p>Suzuki-Miyaura coupling reaction</p> <p>Br- +  <math>\xrightarrow[\text{DMF (4 mL), 120}^\circ\text{C, 24 h}]{\text{catalyst (10 mg), K}_2\text{CO}_3 (2 \text{ mmol})}</math>  + </p> <p>R: H, CH<sub>3</sub>, OCH<sub>3</sub>, CN.</p> <p>Pd loading from EDAX:<br/>10.5 wt% in Pd<sup>II</sup>/TAT-DHBD (3)<br/>14.9 wt% in Pd<sup>II</sup>/TAT-TFP (4),<br/>11.4 wt% in Pd<sup>0</sup>/TAT-DHBD (5)<br/>10.6 wt% in Pd<sup>0</sup>/TAT-TFP (6).<br/>Better yield and selectivity are obtained for -CN substituted starting materials.<br/>Yield = ~55-100%.</p> | S46 |
| <p>Mixed-building units-based imine-COF. BET SA for TAT-DHBD and TAT-TFP are <b>750</b> and <b>646 m<sup>2</sup>/g</b>. Major pore sizes are <b>29.1, 37.9 Å</b> (TAT-DHBD) and <b>11.7 Å</b> (TAT-TFP). Active species: <b>Pd(0)</b>. Reprinted with the permission from the Wiley Online Library (reference S46).</p>                                                                                                                                                                                                          |                                                                                                                                                                                                                               |                                                                                                                                                                                                                                                                                                                                                                                                                                                                                                                                                                                                                                                                                                                                                                                                                                                                                                                 |     |
| 17                                                                                                                                                                                                                                                                                                                                                                                                                                                                                                                               |  <p>PPPP-1, Pd@PPPP-1, PPPP-2</p>                                                                                                          |  <p>Suzuki-Miyaura coupling reaction.<br/>Yield: &gt;90%.</p> <p><b>3 ± 2 nm</b></p>                                                                                                                                                                                                                                                                                                                                                                                                                                                                                                                                                                                                                                                                                                                                        | S47 |
| <p>BET SA: PPPP-1: <b>295 m<sup>2</sup>/g</b> (pore size <b>1.3-2.9 nm</b>); Pd@PPPP-1: <b>198 m<sup>2</sup>/g</b> (pore size <b>1.5-2.6 nm</b>); PPPP-2: <b>301 m<sup>2</sup>/g</b> (pore size <b>1.6-3.3 nm</b>); Pd@PPPP-2: <b>210 m<sup>2</sup>/g</b> (<b>1.7-2.9 nm</b>); Average particle size of Pd nps is <b>3 ± 2 nm</b>. ICP-OES: Pd in PPPP-1 = <b>3.58 wt%</b>; Pd in PPPP-2 = <b>3.63 wt%</b>. Active species: <b>Pd(0)</b>. Reprinted with the permission from the Royal Society of Chemistry (reference S47).</p> |                                                                                                                                                                                                                               |                                                                                                                                                                                                                                                                                                                                                                                                                                                                                                                                                                                                                                                                                                                                                                                                                                                                                                                 |     |
| 18                                                                                                                                                                                                                                                                                                                                                                                                                                                                                                                               |                                                                                                                                                                                                                               |  <p><b>0.5 mol%</b><br/><b>Pd@COF-LZU1</b><br/><b>K<sub>2</sub>CO<sub>3</sub>, p-Xylene</b></p>                                                                                                                                                                                                                                                                                                                                                                                                                                                                                                                                                                                                                                                                                                                             | S48 |

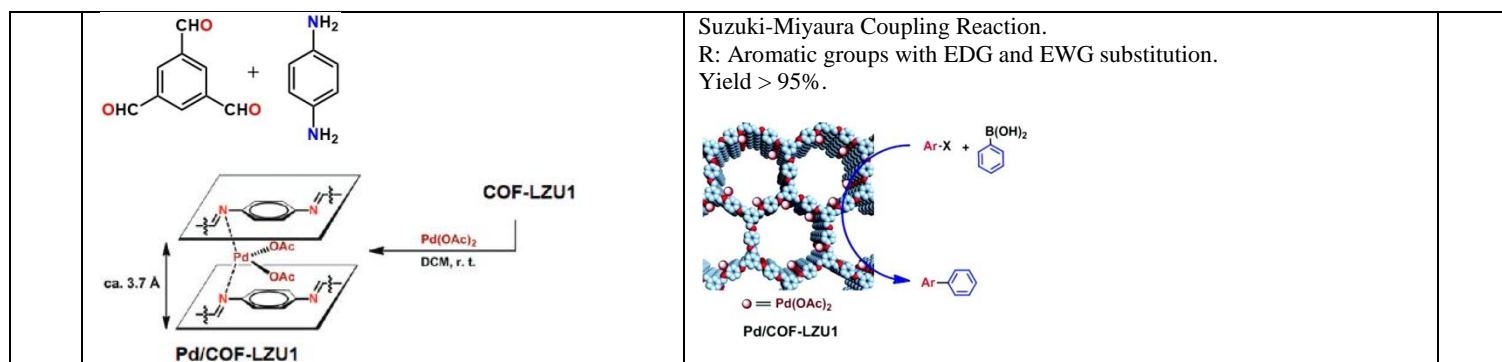

Surface areas of COF-LZU1 and Pd/COF-LZU1 are **410** and **146 m<sup>2</sup>/g**, respectively. ICP: Pd loading in Pd/COF-LZU1 **~7.1 ± 0.5 wt %**. Active species: **Pd(II)**. Reprinted with the permission from the American Chemical Society (reference S48).

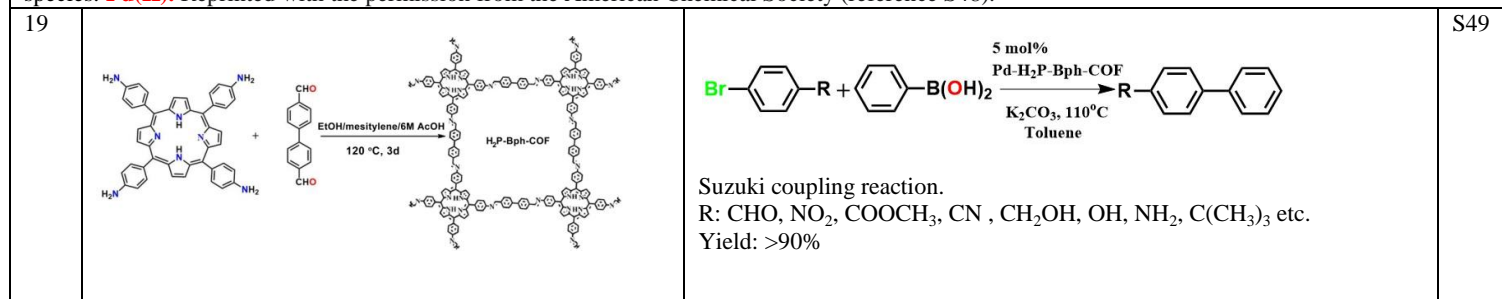

BET SA: H<sub>2</sub>P-Bph-COF and Pd/H<sub>2</sub>P-Bph-COF were **550** and **147 m<sup>2</sup>/g**. Both have **2.96 nm** pore size. ICP-AES: Pd loading **2.87%**. Active species: **Pd(II)**. Reprinted with the permission from the Elsevier (reference S49).

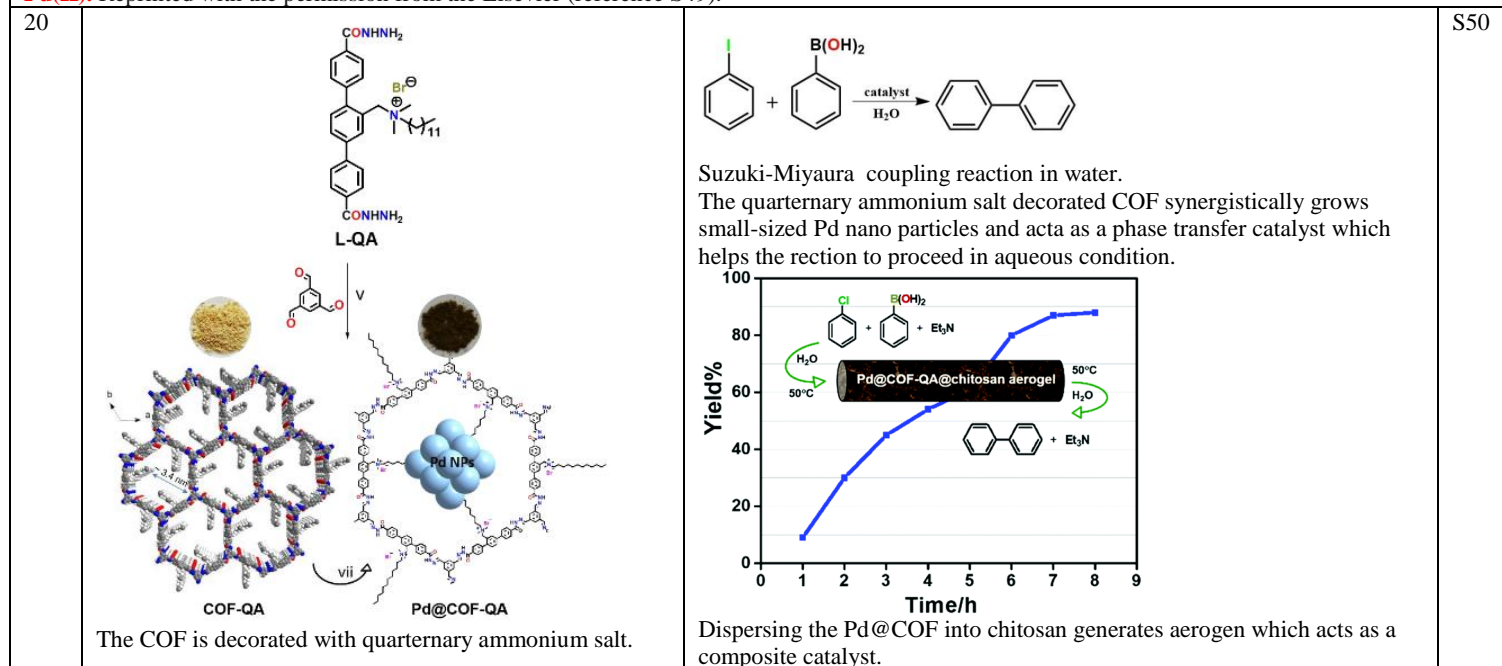

The average size of the Pd nano particles are **2.4 nm**. The COF-QA and Pd@COF-QA have surface areas of **59** and **26 m<sup>2</sup>/g**. ICP: Pd loading in the Pd@COF-QA = **9.2 wt%**. Active species: **Pd(0)**. Reprinted with the permission from the Royal Society of Chemistry (reference S50).

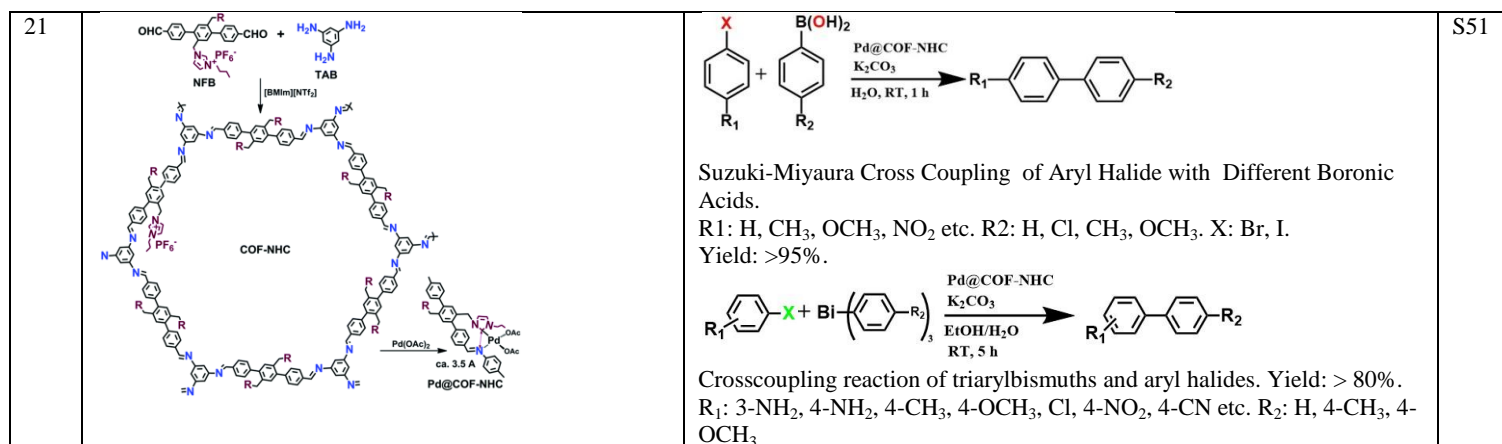

The COF is decorated with N-heterocyclic carbene. The nitrogen centres are coordinating to the Pd<sup>2+</sup> ions. BET SA of COF-NHC is **45 m<sup>2</sup>/g** (Mean pore size: **2.70 nm**. ICP: Pd loading in the COF = **20.1 wt%**. Active species: **Pd(II)**). Reprinted with the permission from the Royal Society of Chemistry (reference S51).

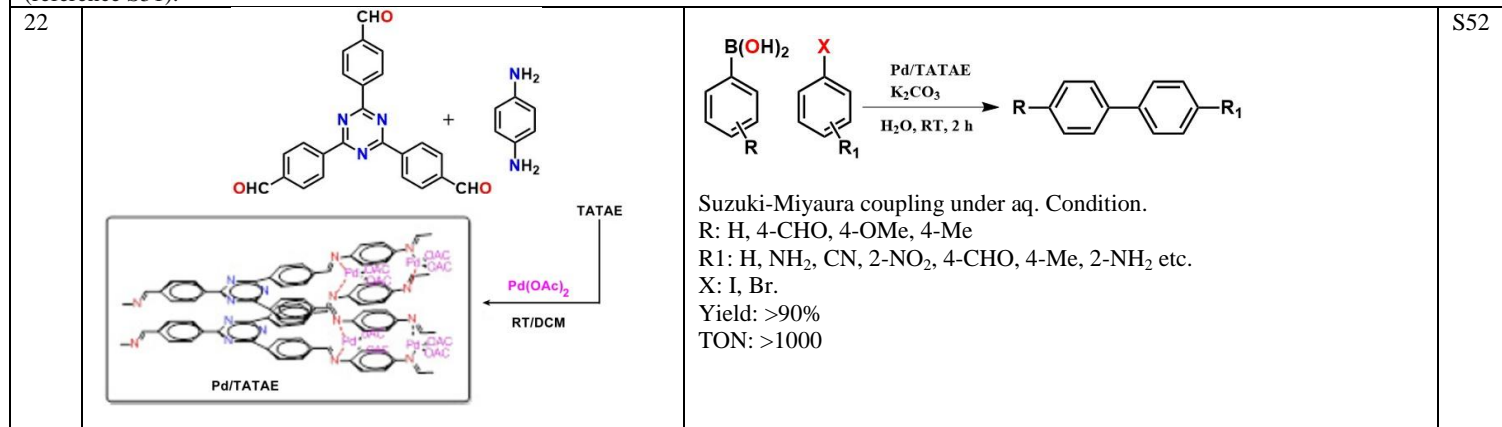

BET surface areas of ATAE and Pd/TATAE are **160** and **104 m<sup>2</sup>/g**. Pore size is **7.6 Å**. Active species: **Pd(II)**. Reprinted with the permission from the Wiley Online Library (reference S52).

### Sonogashira coupling, and Heck coupling reactions

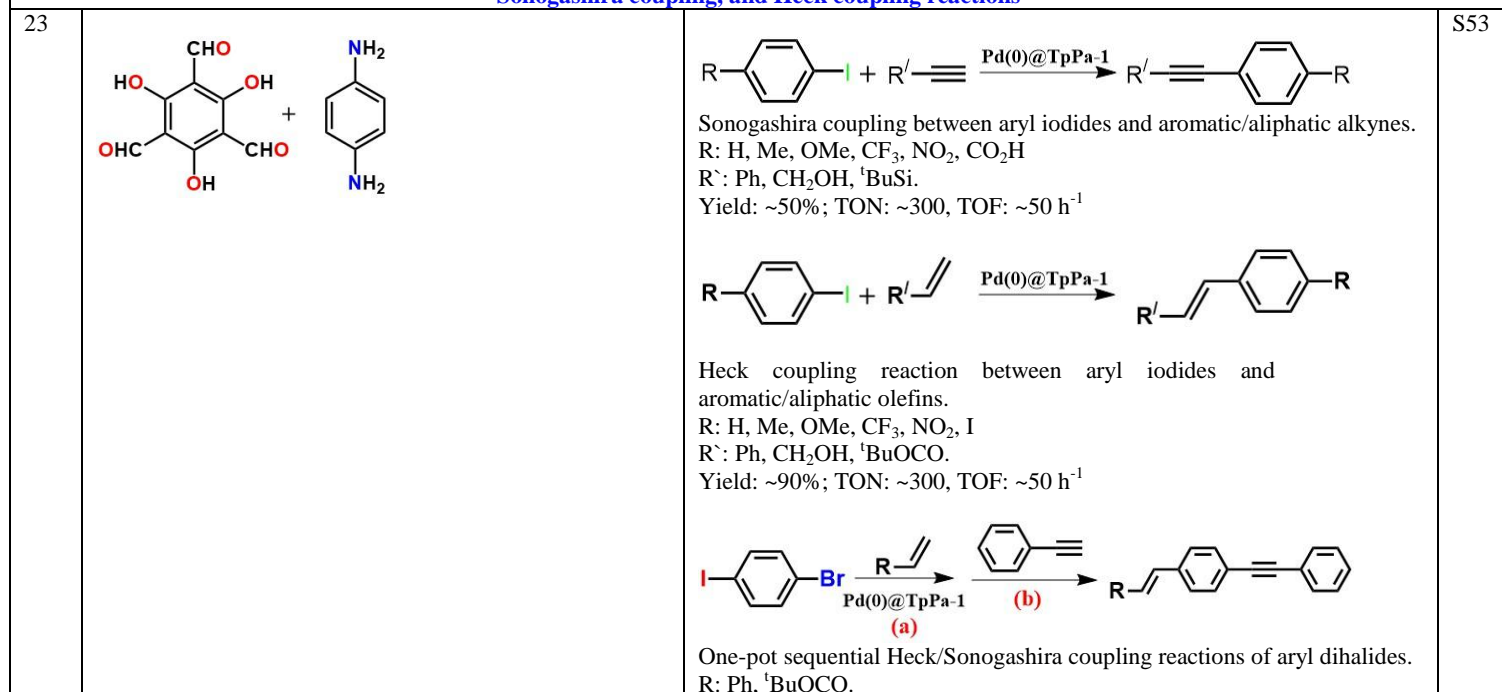



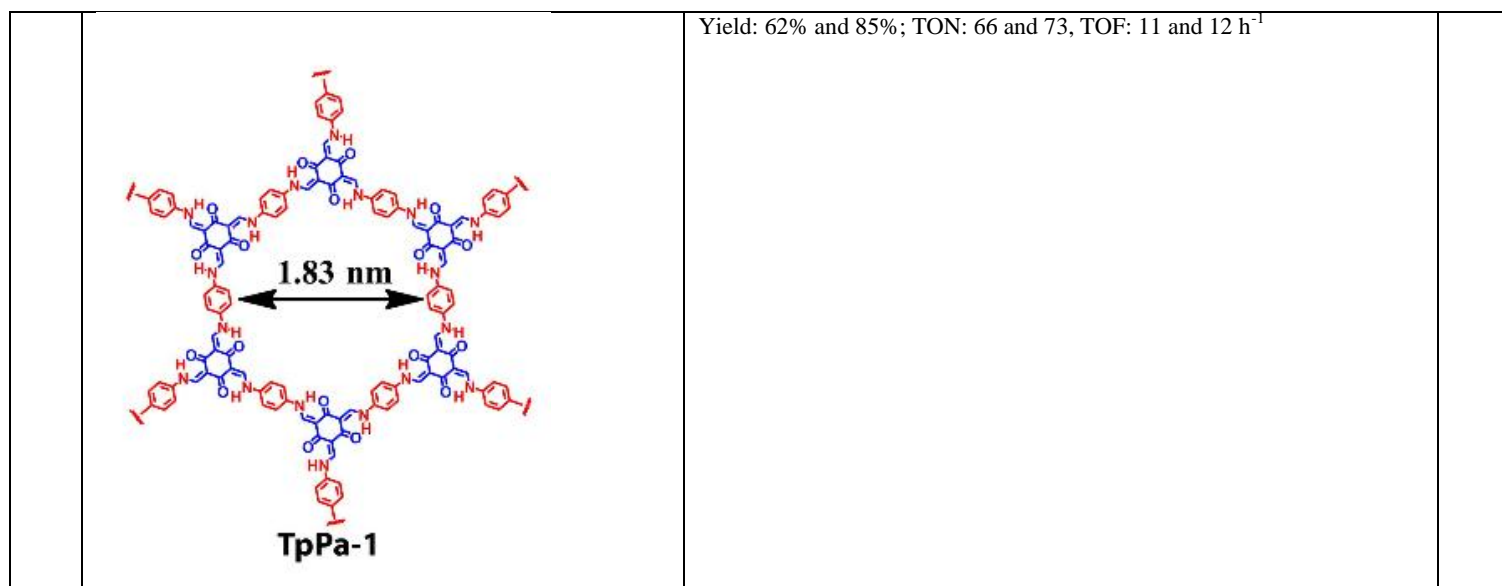

BET surface area for the neat COF is **484 m<sup>2</sup>/g**. Pd(OAc)<sub>2</sub> was loaded into the COF followed by NaBH<sub>4</sub> reduction generates Pd(0) nano particles (**4±2 nm**). From EDX analyses: **Pd(0)@TpPa-1** has a Pd(0) loading of **6.4 wt%** and **Pd(II)@TpPa-1** has a Pd(II) loading of **10.2 wt%**. Active species: **Pd(0)**. Reprinted with the permission from the Royal Society of Chemistry (reference S53).

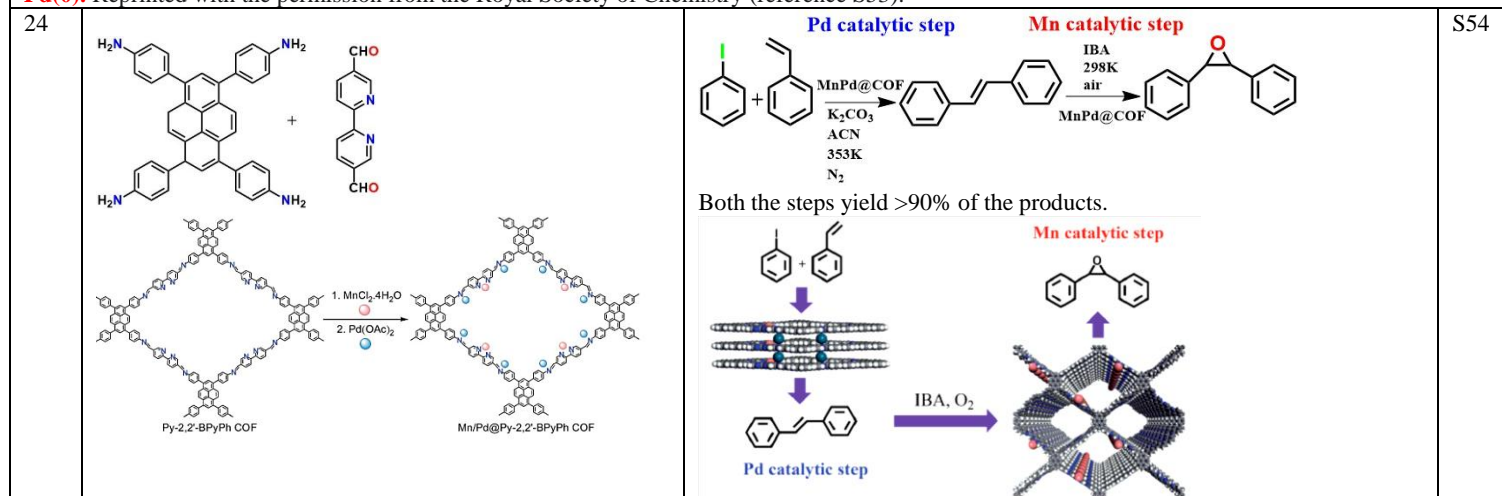

BET surface area of the COF is **2038 m<sup>2</sup>/g** (pore size **2.6 nm**). Mn@COF is **1711 m<sup>2</sup>/g** (pore size **2.6 nm**). MnPd@COF is **1562 m<sup>2</sup>/g** (pore size **2 nm**). ICP-OES: Mn content of Mn@Py-2,20-BPyPh COF was **0.8 wt%**. In comparison, the Mn and Pd content of Mn/Pd@Py-2,20-BPyPh COF were **0.8 wt%** and **9.3 wt%**, respectively. Thus, the pre-loaded Mn was neither lost nor replaced by subsequently loaded Pd. Active species: **Mn(II), Pd(II)**. Reprinted with the permission from the Royal Society of Chemistry (reference S54).

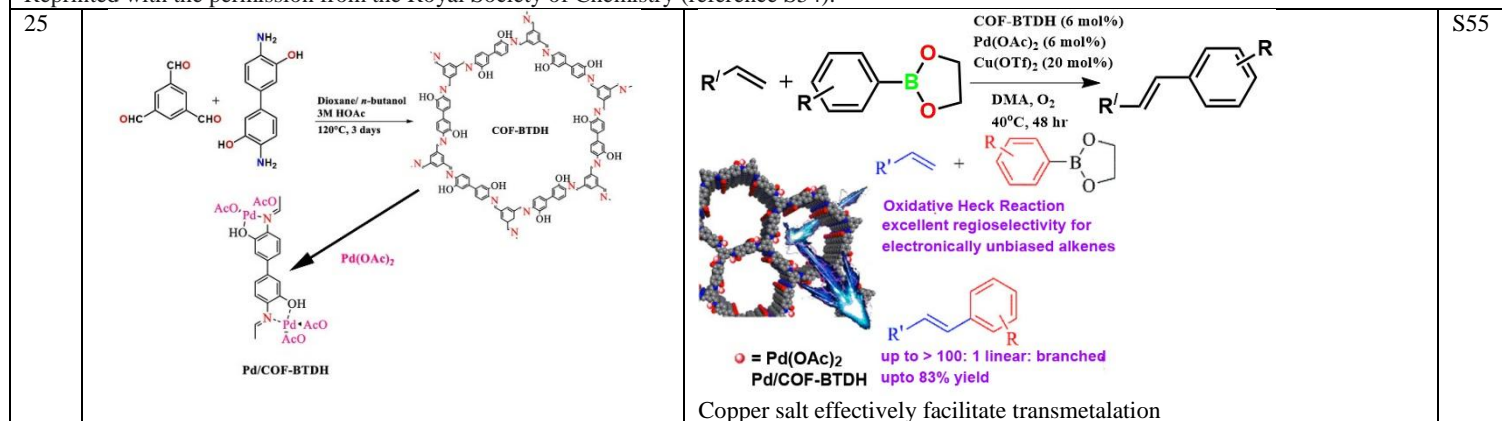

Surface area for COF-BTDH and Pd/COF-BTDH are **91** and **65 m<sup>2</sup>/g**. The average pore size ranges in **2-3 nm** for both the COF and the composite. ICP:



Pd loading = **5.13 wt%**. Active species: **Pd(II)**. Reprinted with the permission from the American Chemical Society (reference S55).

| 26    | 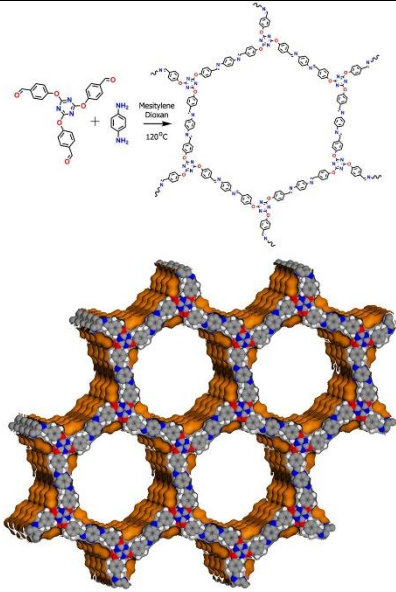 <p><b>IISERP-COF1</b></p> <p>The presence of hydrophobic ether bonds and hydrophilic triazine units present an amphiphilic environment. This is evident from improved adsorption for methanol over toluene and water. Also, from the contact angles. The amphiphilic environment typically supports stabilizing Pd(0) as well as Pd<sup>2+</sup> in mixed-solvent homogeneous medium.</p> |  <table border="1" style="width: 100%; border-collapse: collapse;"> <thead> <tr> <th>Entry</th> <th>R<sub>1</sub></th> <th>R<sub>2</sub></th> <th>Product</th> <th>% yield</th> <th>TON</th> <th>TOF(h<sup>-1</sup>)</th> </tr> </thead> <tbody> <tr> <td rowspan="2">1</td> <td rowspan="2"></td> <td rowspan="2"></td> <td rowspan="2"></td> <td>85 (1a)</td> <td>2473</td> <td>2473</td> </tr> <tr> <td>82 (1b)</td> <td>2500</td> <td>2500</td> </tr> <tr> <td rowspan="4">2</td> <td rowspan="4"></td> <td rowspan="4"></td> <td rowspan="4"></td> <td>94 (2a)</td> <td>824</td> <td>824</td> </tr> <tr> <td>90 (2b)</td> <td>789</td> <td>789</td> </tr> <tr> <td>95 (3a)</td> <td>500</td> <td>84</td> </tr> <tr> <td>91 (3b)</td> <td>478</td> <td>79</td> </tr> <tr> <td rowspan="4">3</td> <td rowspan="4"></td> <td rowspan="4"></td> <td rowspan="4"></td> <td>96(4a)</td> <td>509</td> <td>84</td> </tr> <tr> <td>97(4b)</td> <td>510</td> <td>85</td> </tr> <tr> <td>91(5a)</td> <td>478</td> <td>80</td> </tr> <tr> <td>86(5b)</td> <td>452</td> <td>76</td> </tr> </tbody> </table> | Entry   | R <sub>1</sub> | R <sub>2</sub> | Product               | % yield | TON | TOF(h <sup>-1</sup> ) | 1 |  |  |  | 85 (1a) | 2473 | 2473 | 82 (1b) | 2500 | 2500 | 2 |  |  |  | 94 (2a) | 824 | 824 | 90 (2b) | 789 | 789 | 95 (3a) | 500 | 84 | 91 (3b) | 478 | 79 | 3 |  |  |  | 96(4a) | 509 | 84 | 97(4b) | 510 | 85 | 91(5a) | 478 | 80 | 86(5b) | 452 | 76 | S56 |
|-------|-----------------------------------------------------------------------------------------------------------------------------------------------------------------------------------------------------------------------------------------------------------------------------------------------------------------------------------------------------------------------------------------------------------------------------------------------------------------------------|---------------------------------------------------------------------------------------------------------------------------------------------------------------------------------------------------------------------------------------------------------------------------------------------------------------------------------------------------------------------------------------------------------------------------------------------------------------------------------------------------------------------------------------------------------------------------------------------------------------------------------------------------------------------------------------------------------------------------------------------------------------------------------------------------------------------------------------------------------------------------------------------------------------------------------------------------------------------------------------------------------------------------------------------------------------------------------------------------------------------------------------------------------------------------------------|---------|----------------|----------------|-----------------------|---------|-----|-----------------------|---|--|--|--|---------|------|------|---------|------|------|---|--|--|--|---------|-----|-----|---------|-----|-----|---------|-----|----|---------|-----|----|---|--|--|--|--------|-----|----|--------|-----|----|--------|-----|----|--------|-----|----|-----|
| Entry | R <sub>1</sub>                                                                                                                                                                                                                                                                                                                                                                                                                                                              | R <sub>2</sub>                                                                                                                                                                                                                                                                                                                                                                                                                                                                                                                                                                                                                                                                                                                                                                                                                                                                                                                                                                                                                                                                                                                                                                        | Product | % yield        | TON            | TOF(h <sup>-1</sup> ) |         |     |                       |   |  |  |  |         |      |      |         |      |      |   |  |  |  |         |     |     |         |     |     |         |     |    |         |     |    |   |  |  |  |        |     |    |        |     |    |        |     |    |        |     |    |     |
| 1     |                                                                                                                                                                                                                                                                                                                                                                                                                                                                             |                                                                                                                                                                                                                                                                                                                                                                                                                                                                                                                                                                                                                                                                                                                                                                                                                                                                                                                                                                                                                                                                                                                                                                                       |         | 85 (1a)        | 2473           | 2473                  |         |     |                       |   |  |  |  |         |      |      |         |      |      |   |  |  |  |         |     |     |         |     |     |         |     |    |         |     |    |   |  |  |  |        |     |    |        |     |    |        |     |    |        |     |    |     |
|       |                                                                                                                                                                                                                                                                                                                                                                                                                                                                             |                                                                                                                                                                                                                                                                                                                                                                                                                                                                                                                                                                                                                                                                                                                                                                                                                                                                                                                                                                                                                                                                                                                                                                                       |         | 82 (1b)        | 2500           | 2500                  |         |     |                       |   |  |  |  |         |      |      |         |      |      |   |  |  |  |         |     |     |         |     |     |         |     |    |         |     |    |   |  |  |  |        |     |    |        |     |    |        |     |    |        |     |    |     |
| 2     |                                                                                                                                                                                                                                                                                                                                                                                                                                                                             |                                                                                                                                                                                                                                                                                                                                                                                                                                                                                                                                                                                                                                                                                                                                                                                                                                                                                                                                                                                                                                                                                                                                                                                       |         | 94 (2a)        | 824            | 824                   |         |     |                       |   |  |  |  |         |      |      |         |      |      |   |  |  |  |         |     |     |         |     |     |         |     |    |         |     |    |   |  |  |  |        |     |    |        |     |    |        |     |    |        |     |    |     |
|       |                                                                                                                                                                                                                                                                                                                                                                                                                                                                             |                                                                                                                                                                                                                                                                                                                                                                                                                                                                                                                                                                                                                                                                                                                                                                                                                                                                                                                                                                                                                                                                                                                                                                                       |         | 90 (2b)        | 789            | 789                   |         |     |                       |   |  |  |  |         |      |      |         |      |      |   |  |  |  |         |     |     |         |     |     |         |     |    |         |     |    |   |  |  |  |        |     |    |        |     |    |        |     |    |        |     |    |     |
|       |                                                                                                                                                                                                                                                                                                                                                                                                                                                                             |                                                                                                                                                                                                                                                                                                                                                                                                                                                                                                                                                                                                                                                                                                                                                                                                                                                                                                                                                                                                                                                                                                                                                                                       |         | 95 (3a)        | 500            | 84                    |         |     |                       |   |  |  |  |         |      |      |         |      |      |   |  |  |  |         |     |     |         |     |     |         |     |    |         |     |    |   |  |  |  |        |     |    |        |     |    |        |     |    |        |     |    |     |
|       |                                                                                                                                                                                                                                                                                                                                                                                                                                                                             |                                                                                                                                                                                                                                                                                                                                                                                                                                                                                                                                                                                                                                                                                                                                                                                                                                                                                                                                                                                                                                                                                                                                                                                       |         | 91 (3b)        | 478            | 79                    |         |     |                       |   |  |  |  |         |      |      |         |      |      |   |  |  |  |         |     |     |         |     |     |         |     |    |         |     |    |   |  |  |  |        |     |    |        |     |    |        |     |    |        |     |    |     |
| 3     |                                                                                                                                                                                                                                                                                                                                                                                                                                                                             |                                                                                                                                                                                                                                                                                                                                                                                                                                                                                                                                                                                                                                                                                                                                                                                                                                                                                                                                                                                                                                                                                                                                                                                       |         | 96(4a)         | 509            | 84                    |         |     |                       |   |  |  |  |         |      |      |         |      |      |   |  |  |  |         |     |     |         |     |     |         |     |    |         |     |    |   |  |  |  |        |     |    |        |     |    |        |     |    |        |     |    |     |
|       |                                                                                                                                                                                                                                                                                                                                                                                                                                                                             |                                                                                                                                                                                                                                                                                                                                                                                                                                                                                                                                                                                                                                                                                                                                                                                                                                                                                                                                                                                                                                                                                                                                                                                       |         | 97(4b)         | 510            | 85                    |         |     |                       |   |  |  |  |         |      |      |         |      |      |   |  |  |  |         |     |     |         |     |     |         |     |    |         |     |    |   |  |  |  |        |     |    |        |     |    |        |     |    |        |     |    |     |
|       |                                                                                                                                                                                                                                                                                                                                                                                                                                                                             |                                                                                                                                                                                                                                                                                                                                                                                                                                                                                                                                                                                                                                                                                                                                                                                                                                                                                                                                                                                                                                                                                                                                                                                       |         | 91(5a)         | 478            | 80                    |         |     |                       |   |  |  |  |         |      |      |         |      |      |   |  |  |  |         |     |     |         |     |     |         |     |    |         |     |    |   |  |  |  |        |     |    |        |     |    |        |     |    |        |     |    |     |
|       |                                                                                                                                                                                                                                                                                                                                                                                                                                                                             |                                                                                                                                                                                                                                                                                                                                                                                                                                                                                                                                                                                                                                                                                                                                                                                                                                                                                                                                                                                                                                                                                                                                                                                       |         | 86(5b)         | 452            | 76                    |         |     |                       |   |  |  |  |         |      |      |         |      |      |   |  |  |  |         |     |     |         |     |     |         |     |    |         |     |    |   |  |  |  |        |     |    |        |     |    |        |     |    |        |     |    |     |

BET SA: IISERP-COF1 = **408.5 m<sup>2</sup>/g**; Pd@IISERP-COF1 = **404 m<sup>2</sup>/g**. BJH pore size: IISERP-COF1 = **23 Å**; Pd@IISERP-COF1 = **19 Å**. Pd nP size: **5 to 20 nm**. EDAX: Pd loading = **18-20 wt%**. Active species: **Pd(0)**. Reprinted with the permission from the Nature Publishing Group (reference S56).

### CO<sub>2</sub> utilization

|    |                                                                                                            |                                                                                                                                                                                                                                                                                                                                                                                                                                                                                            |     |
|----|------------------------------------------------------------------------------------------------------------|--------------------------------------------------------------------------------------------------------------------------------------------------------------------------------------------------------------------------------------------------------------------------------------------------------------------------------------------------------------------------------------------------------------------------------------------------------------------------------------------|-----|
| 27 | 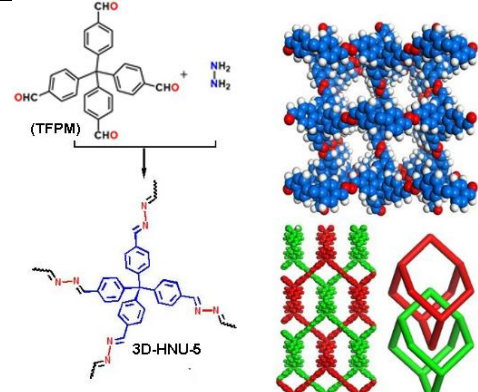 <p><b>3D-HNU-5</b></p> | <p>Chemical fixation of CO<sub>2</sub> to propargyl alcohols.</p>  <p>R1, R2: Me, Me, Me, Et, Pr etc.</p> <p>Reaction conditions: propargylic alcohols (1.0 mmol), catalyst (0.1 mol%, based on loading of Ag), DBU (1.0 mmol), CH<sub>3</sub>CN (3 mL), CO<sub>2</sub> (99.999%, balloon), RT, 12 h. The yields were determined by <sup>1</sup>H NMR spectroscopy.<br/>Yield &gt;99%<br/>TON: 990</p> | S57 |
|----|------------------------------------------------------------------------------------------------------------|--------------------------------------------------------------------------------------------------------------------------------------------------------------------------------------------------------------------------------------------------------------------------------------------------------------------------------------------------------------------------------------------------------------------------------------------------------------------------------------------|-----|

BET surface area is **864 m<sup>2</sup>/g**. Pore size of the COF is **1.01 nm**. The COF shows selective CO<sub>2</sub> capture (123.1 mg/g@273K, 1bar). Upon Ag loading the BET SA is **300 m<sup>2</sup>/g** and CO<sub>2</sub> capacity drops to **83 mg/g**. Average particle size is **~1.7 nm**. EDX and ICP: Ag loading in COF = **2.32 wt%**. Active species: **Ag(0)**. Reprinted with the permission from the Royal Society of Chemistry (reference S57).

|    |                                                                                                                |                                                                                                                                                                                                                                                                                                                                                                                                                                                                       |     |
|----|----------------------------------------------------------------------------------------------------------------|-----------------------------------------------------------------------------------------------------------------------------------------------------------------------------------------------------------------------------------------------------------------------------------------------------------------------------------------------------------------------------------------------------------------------------------------------------------------------|-----|
| 28 | 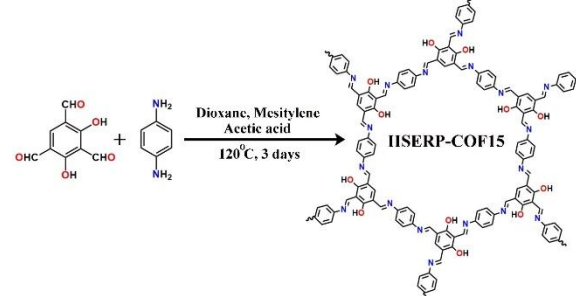 <p><b>IISERP-COF15</b></p> |   <p>1; 91.2%<br/>163; 41</p> <p>2; 97.4%<br/>174; 43.4</p> <p>3; 96.3%<br/>172; 43</p> <p>4; 90.6%<br/>162; 40.4</p> <p>5; 87.8%<br/>157; 39.2</p> <p>6; 85.2%<br/>152; 38</p> <p>DBU is used as the base. 10 mol% catalyst is used for the reaction. 152-174 depending upon substrates.</p> | S58 |
|----|----------------------------------------------------------------------------------------------------------------|-----------------------------------------------------------------------------------------------------------------------------------------------------------------------------------------------------------------------------------------------------------------------------------------------------------------------------------------------------------------------------------------------------------------------------------------------------------------------|-----|

BET surface area of the COF is **1230 m<sup>2</sup>/g**, DFT pore size is **12 Å**. Ag(0) is the catalytically active species. Ag loading is **6.3 wt%**. Average particle size is **3.3 nm**. Reprinted with the permission from the Wiley Online Library (reference S58).

**Other important reactions (silicon based cross coupling, bezylic alcohol oxidation, bio catalysis, rearrangement etc.)**

|    |                                                                                   |                                                                                                                                                                                                                                                                                       |     |
|----|-----------------------------------------------------------------------------------|---------------------------------------------------------------------------------------------------------------------------------------------------------------------------------------------------------------------------------------------------------------------------------------|-----|
| 29 | 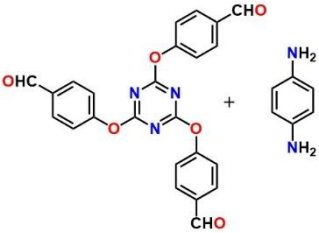 |  <p>One-pot silicon-based cross-coupling reaction of silanes and aryl iodides.<br/>R: 4-CH<sub>3</sub>, 2-CH<sub>3</sub>, 4-OCH<sub>3</sub>, 4-F, 4-OH, 4-NO<sub>2</sub>.<br/>Yield: 70 to 90%.</p> | S59 |
|----|-----------------------------------------------------------------------------------|---------------------------------------------------------------------------------------------------------------------------------------------------------------------------------------------------------------------------------------------------------------------------------------|-----|

BET SA for COF-SDU1 and Pd(II)/COF-SDU1 are **1125** and **1052 m<sup>2</sup>/g**. Pore sizes are **2.63** and **2.51**, respectively. Active species: **Pd(II)**. Reprinted with the permission from the Royal Society of Chemistry (reference S59).

|    |                                                                                    |                                                                                                                                                                                                                                                                                                                                                                                                                                                                                                                             |     |
|----|------------------------------------------------------------------------------------|-----------------------------------------------------------------------------------------------------------------------------------------------------------------------------------------------------------------------------------------------------------------------------------------------------------------------------------------------------------------------------------------------------------------------------------------------------------------------------------------------------------------------------|-----|
| 30 | 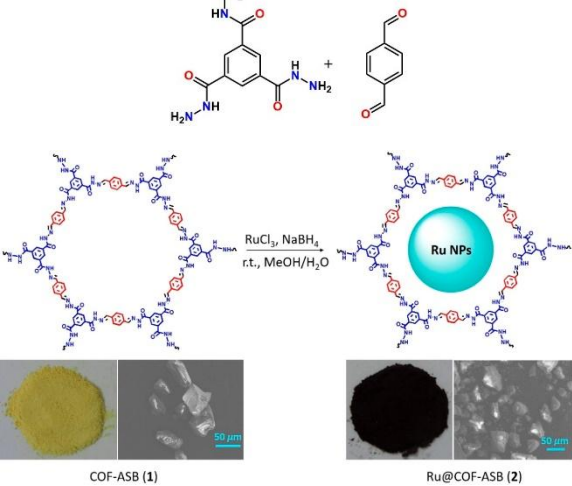 |  <p>Oxidation of benzylic alcohol under air. Conversion &gt;90%.</p>   <p>Solvent-free one-pot tandem reaction from benzyl alcohol. (a) Reaction time examination (black line) and leaching test (red line) for solvent free one-pot tandem synthesis of imine</p> | S60 |
|----|------------------------------------------------------------------------------------|-----------------------------------------------------------------------------------------------------------------------------------------------------------------------------------------------------------------------------------------------------------------------------------------------------------------------------------------------------------------------------------------------------------------------------------------------------------------------------------------------------------------------------|-----|

BET surface areas: COF-ASB is **233** and Ru@COF-ASB is **101 m<sup>2</sup>/g**. Av. Particle size of Ru nps = **2-5 nm**. ICP: Ru loading = **4.1 wt%**. Active species: **Ru(0)**. Reprinted with the permission from the American Chemical Society (reference S60).

|    |                                                                                                                                            |                                                                                                                                                                                                                                                                                                                                                                                                                                                       |     |
|----|--------------------------------------------------------------------------------------------------------------------------------------------|-------------------------------------------------------------------------------------------------------------------------------------------------------------------------------------------------------------------------------------------------------------------------------------------------------------------------------------------------------------------------------------------------------------------------------------------------------|-----|
| 31 | 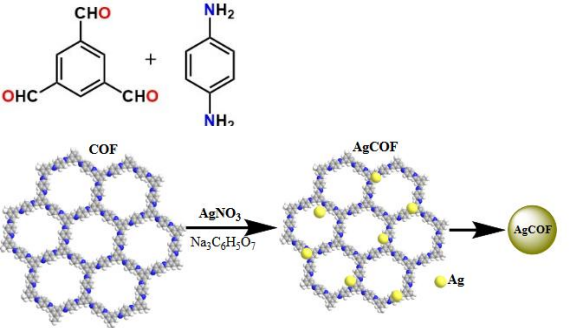 <p>Sodium citrate generates the Ag nano particles.</p> | <p>AgCOF catalysed glucose (GL)-Cu(II) to Cu<sub>2</sub>O followed using Resonance Rayleigh Scattering (RRS).<br/>Detection limit for Melamine = 0.72 nmol/L; Urea = 30.4 nmol/L and BPA = 0.15 nmol/L BPA.</p>  <p>(a) Principle of the regulation of AgCOF catalysis of GL-Cu(II) by Apt to detect ML. (b) Principle of the catalytic enhancement of AgCOF.</p> | S61 |
|----|--------------------------------------------------------------------------------------------------------------------------------------------|-------------------------------------------------------------------------------------------------------------------------------------------------------------------------------------------------------------------------------------------------------------------------------------------------------------------------------------------------------------------------------------------------------------------------------------------------------|-----|

AgCOF is being prepared by the reduction of AgNO<sub>3</sub> using trisodium citrate solution. The Ag nano particles are grown on the COF surface. Reprinted with the permission from the American Chemical Society (reference S61).

|    |  |     |
|----|--|-----|
| 32 |  | S62 |
|----|--|-----|

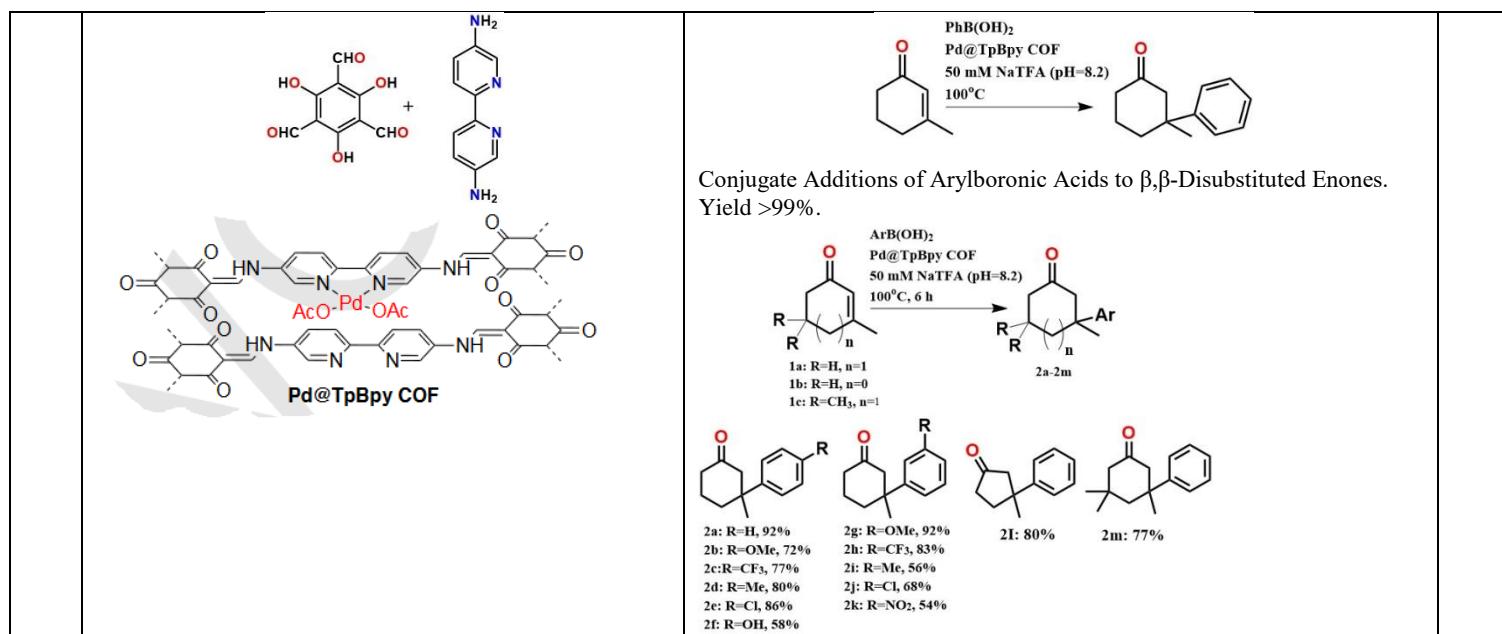

BET surface area of TpBpy COF is **578 m<sup>2</sup>/g** and Pd@TpBpyCOF is **390 m<sup>2</sup>/g**. Active species: **Pd(II)**. Reprinted with the permission from the Wiley Online Library (reference S62).

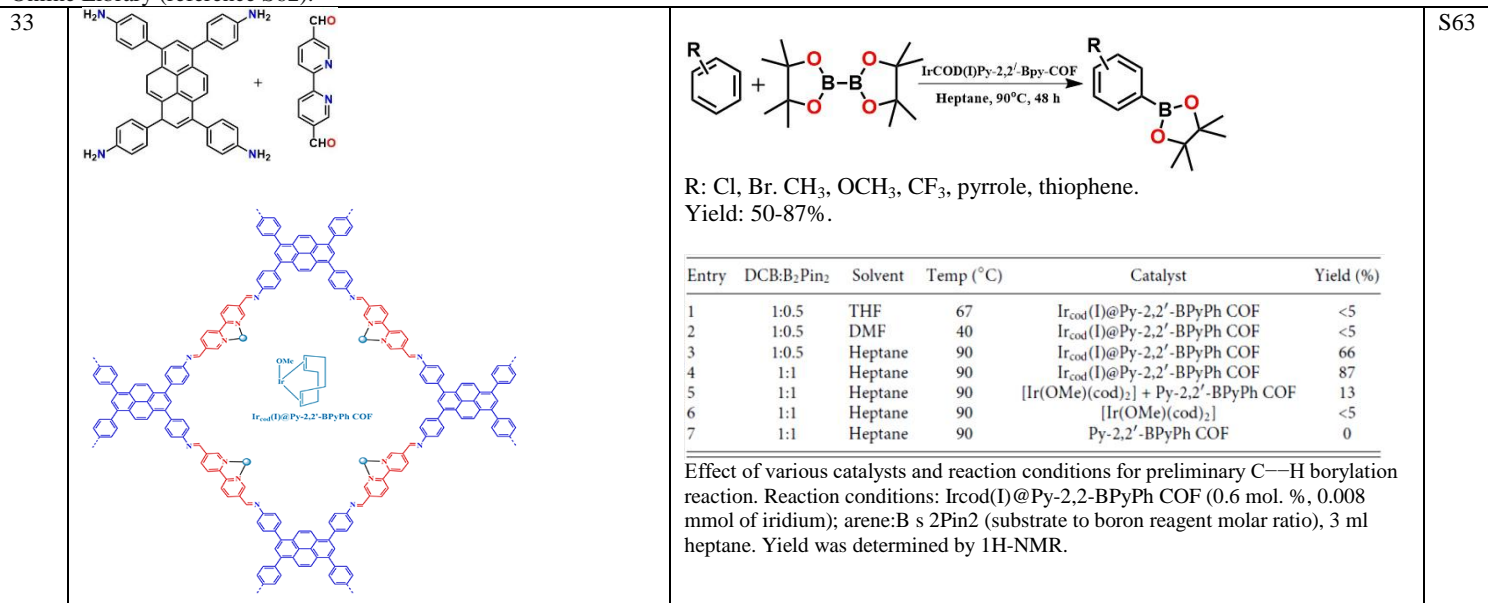

BET SA for Py-2,2'-BPyPh COF and IrCOd(I)s@Py-2,2'-BPyPh COF are **1785** and **859 m<sup>2</sup>/g**. The pore sizes are **2.3** and **1.59 nm**. ICP: Ir loading = **3.1 wt%**. Active species: **Ir(I)**. Reprinted with the permission from the American Institute of Physics (reference S63).

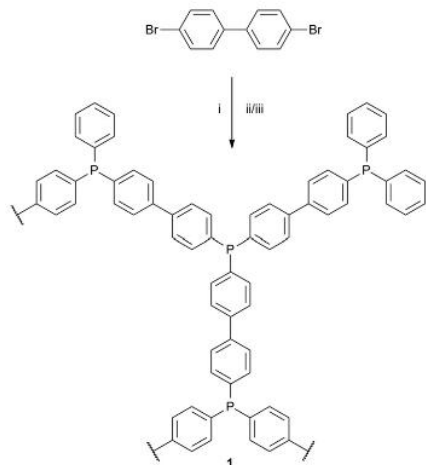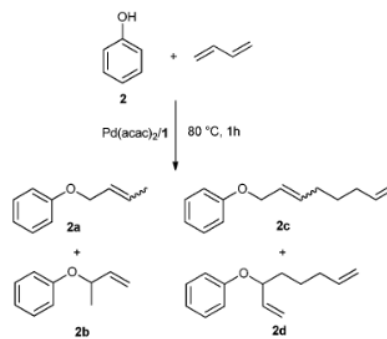

Telomerisation of 1,3-butadiene with Phenol.

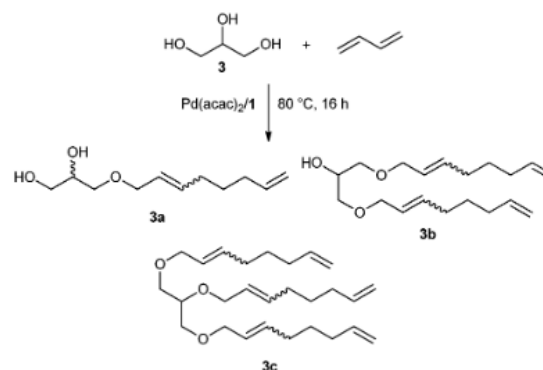

Telomerisation of 1,3-butadiene with glycerol.

BET SA: **135 m<sup>2</sup>/g**, pore volume of **0.04 cm<sup>3</sup>/g**. BET SA after metal loading [Pd(acac)<sub>2</sub>] is **58 m<sup>2</sup>/g**. Reprinted with the permission from the Royal Society of Chemistry (reference S64).

**Note:** Authors have taken the necessary rights and permissions from the concerned authorities/publishers prior to use their data or inputs.

## References:

- S1. Fang, Q.; Gu, S.; Zheng, J.; Zhuang, Z.; Qiu, S.; Yan, Y. 3D Microporous Base-Functionalized Covalent Organic Frameworks for Size-Selective Catalysis. *Angew. Chem. Int. Ed.* 2014, **126**, 2922–2926.
- S2. Li, H.; Pan, Q.; Ma, Y.; Guan, X.; Xue, M.; Fang, Q.; Yan, Y.; Valtchev, V.; Qiu, S. Three-Dimensional Covalent Organic Frameworks with Dual Linkages for Bifunctional Cascade Catalysis. *J. Am. Chem. Soc.* **2016**, *138*, 14783–14788.
- S3. Shinde, D. B.; Kandambeth, S.; Pachfule, P.; Kumar, R. R. I.; Banerjee, R. Bifunctional covalent organic frameworks with two dimensional organocatalytic micropores. *Chem. Commun.* **2015**, *51*, 310-313.
- S4. Ma, Y.-X.; Li, Z.-J.; Wei, L.; Ding, S.-Y.; Zhang, Y.-B.; Wang, W. A Dynamic Three-Dimensional Covalent Organic Framework. *J. Am. Chem. Soc.* **2017**, *139*, 4995–4998.
- S5. Luis-Barrerra, J.; Cano, R.; Imani-Shakibaei, G.; Heras-Domingo, J.; Pérez-Carvajal, J.; Imaz, I.; Maspoch, D.; Solans-Monfort, X.; Alemán, J.; Mas-Ballesté, R. Switching acidic and basic catalysis through supramolecular functionalization in a porous 3D covalent imine-based material. *Catal. Sci. Technol.* **2019**, *9*, 6007-6014.
- S6. Ding, L.-G.; Yao, B.-J.; Li, F.; Shi, S.-C.; Huang, N.; Yin, H.-B.; Guan, Q.; Dong, Y.-B. Ionic liquid-decorated COF and its covalent composite aerogel for selective CO<sub>2</sub> adsorption and catalytic conversion. *J. Mater. Chem. A* **2019**, *7*, 4689-4698.
- S7. Saptal, V.; Shinde, D. B.; Banerjee, R.; Bhanage, B. M. State-of-the-art catechol porphyrin COF catalyst for chemical fixation of carbon dioxide via cyclic carbonates and oxazolidinones. *Catal. Sci. Technol.* **2016**, *6*, 6152-6158.
- S8. Mu, Z.-J. Ding, X.; Chen, Z.-Y.; Han, B.-H. Zwitterionic Covalent Organic Frameworks as Catalysts for Hierarchical Reduction of CO<sub>2</sub> with Amine and Hydrosilane. *ACS Appl. Mater. Interfaces* **2018**, *10*, 41350-41358.

- S9. Zhi, Y.; Shao, P.; Feng, X.; Xia, H.; Zhang, Y.; Shi, Z.; Mu, Y.; Liu, X. Covalent organic frameworks: efficient, metal-free, heterogeneous organocatalysts for chemical fixation of CO<sub>2</sub> under mild conditions. *J. Mater. Chem. A* **2018**, *6*, 374-382.
- S10. Sun, Q.; Tang, Y.; Aguila, B.; Wang, S.; Xiao, F.-S.; Thallapally, P. K.; Al-Enizi, A. M.; Nafady, A. Ma, S. Reaction Environment Modification in Covalent Organic Frameworks for Catalytic Performance Enhancement. *Angew. Chem. Int. Ed.* **2019**, *131*, 8762-8767.
- S11. Peng, Y.; Hu, Z.; Gao, Y.; Yuan, D.; Kang, Z.; Qian, Y.; Yan, N.; Zhao, D. Synthesis of a Sulfonated Two-Dimensional Covalent Organic Framework as an Efficient Solid Acid Catalyst for Biobased Chemical Conversion. *ChemSusChem* **2015**, *8*, 3208-3212.
- S12. Gao, W.; Sun, X.; Niu, H.; Song, X.; Li, K.; Gao, H.; Zhang, W.; Yu, J.; Jia, M. Phosphomolybdic acid functionalized covalent organic frameworks: Structure characterization and catalytic properties in olefin epoxidation. *Microporous Mesoporous Mater.* **2015**, *213*, 59-67.
- S13. Xu, H.; Chen, X.; Gao, J.; Lin, J.; Addicoat, M.; Irlle, S.; Catalytic covalent organic frameworks via pore surface engineering. Jiang, D. *Chem. Commun.* **2014**, *50*, 1292-1294.
- S14. Li, X.; Wang, Z.; Sun, J.; Gao, J.; Zhao, Y.; Cheng, P.; Aguila, B.; Ma, S.; Chen, Y.; Zhang, Z. Squaramide-decorated covalent organic framework as a new platform for biomimetic hydrogen-bonding organocatalysis. *Chem. Commun.* **2019**, *55*, 5423-5426.
- S15. Wu, Y.; Xu, H.; Chen, X.; Gao, J.; Jiang, D. A  $\pi$ -electronic covalent organic framework catalyst:  $\pi$ -walls as catalytic beds for Diels-Alder reactions under ambient conditions. *Chem. Commun.* **2015**, *51*, 10096-10098.
- S16. Shen, J.-C.; Jiang, W.-L.; Guo, W.-D.; Qi, Q.-Y.; Ma, D.-L.; Lou, X.; Shen, M.; Hu, B.; Yang, H.-B.; Zhao, X. A rings-in-pores net: crown ether-based covalent organic frameworks for phase-transfer catalysis. *Chem. Commun.* **2020**, *56*, 595-598.
- S17. Zhang, W.; Jiang, P.; Wang, Y.; Zhang, J.; Gao, Y.; Zhang, P. Bottom-up approach to engineer a molybdenum-doped covalent-organic framework catalyst for selective oxidation reaction. *RSC Adv.* **2014**, *4*, 51544-51547.
- S18. Mu, M.; Wang, Y.; Qin, Y.; Yan, X.; Li, Y.; Chen, L. Two-Dimensional Imine-Linked Covalent Organic Frameworks as a Platform for Selective Oxidation of Olefins. *ACS Appl. Mater. Interfaces* **2017**, *9*, 22856-22863.
- S19. Zhao, M.; Wu, C.-D. Synthesis and post-metalation of a covalent-porphyrinic framework for highly efficient aerobic epoxidation of olefins. *Catal. Commun.* **2017**, *99*, 146-149.
- S20. Yu, D.; Gao, W.; Xing, S.; Lian, L.; Zhang, H.; Wang, X.; Lou, D. Fe-doped H<sub>3</sub>PMo<sub>12</sub>O<sub>40</sub> immobilized on covalent organic frameworks (Fe/PMA@COFs): a heterogeneous catalyst for the epoxidation of cyclooctene with H<sub>2</sub>O<sub>2</sub>. *RSC Adv.* **2019**, *9*, 4884-4891.
- S21. Zhang, W.; Jiang, P.; Wang, Y.; Zhang, J.; Zhang, P. Bottom-up approach to engineer two covalent porphyrinic frameworks as effective catalysts for selective oxidation. *Catal. Sci. Technol.* **2015**, *5*, 101-104.
- S22. Chakraborty, D.; Nandi, S.; Mullangi, D.; Haldar, S.; Vinod, C. P.; Vaidhyanathan, R. Cu/Cu<sub>2</sub>O Nanoparticles Supported on a Phenol-Pyridyl COF as a Heterogeneous Catalyst for the Synthesis of Unsymmetrical Dienes via Glaser-Hay Coupling. *ACS Appl. Mater. Interfaces* **2019**, *11*, 15670-15679.
- S23. Han, Y.; Zhang, M.; Zhang, Y.-Q.; Zhang, Z.-H. Copper immobilized at a covalent organic framework: an efficient and recyclable heterogeneous catalyst for the Chan-Lam coupling reaction of aryl boronic acids and amines. *Green Chem.* **2018**, *20*, 4891-4900.
- S24. Vardhan, H.; Verma, G.; Ramani, S.; Nafady, A.; Al-Enizi, A. M.; Pan, Y.; Yang, Z.; Yang, H.; Ma, S. Covalent Organic Framework Decorated with Vanadium as a New Platform for Prins Reaction and Sulfide Oxidation. *ACS Appl. Mater. Interfaces* **2019**, *11*, 3070-3079.
- S25. Vardhan, H.; Hou, L.; Yee, E.; Nafady, A.; Al-Abdrabnabi, M. A.; Al-Enizi, A. M.; Pan, Y.; Yang, Z.; Ma, S. Vanadium Doped Covalent-Organic Frameworks: An Effective Heterogeneous Catalyst for Modified Mannich-Type Reaction. *ACS Sustainable Chem. Eng.* **2019**, *7*, 4878-4888.
- S26. Cifuentes, J. M. C.; Ferreira, B. X.; Esteves, P. M.; Buarque, C. D. Decarboxylative Cross-Coupling of Cinnamic Acids Catalyzed by Iron-Based Covalent Organic Frameworks. *Topics in Catalysis* **2018**, *61*, 689-698.
- S27. Maia, R. A.; Berg, F.; Ritleng, V.; Louis, B.; Esteves, P. M. Design, Synthesis and Characterization of Nickel-Functionalized Covalent Organic Framework NiCl@RIO-12 for Heterogeneous Suzuki-Miyaura Catalysis. *Chem. Eur. J.* **2020**, *26*, 2051-2059.
- S28. Haug, W. K.; Wolfson, E. R.; Morman, B. T.; Thomas, C. M.; McGrier, P. L. A Nickel-Doped Dehydrobenzoannulene-Based Two-Dimensional Covalent Organic Framework for the Reductive Cleavage of Inert Aryl C-S Bonds. *J. Am. Chem. Soc.* **2020**, *142*, 5521-5525.
- S29. Mullangi, D.; Chakraborty, D.; Pradeep, A.; Koshti, V.; Vinod, C. P.; Panja, S.; Nair, S.; Vaidhyanathan, R. Highly Stable COF-Supported Co/Co(OH)<sub>2</sub> Nanoparticles Heterogeneous Catalyst for Reduction of Nitrile/Nitro Compounds under Mild Conditions. *Small* **2018**, *14*, 1801233.
- S30. Ma, Y.; Liu, X.; Guan, X.; Li, H.; Yusran, Y.; Xue, M.; Fang, Q.; Yan, Y.; Qiu, S.; Valtchev, V. One-pot cascade syntheses of microporous and mesoporous pyrazine-linked covalent organic frameworks as Lewis-acid catalysts. *Dalton Trans.* **2019**, *48*, 7352-7357.



- S31. Sun, Q.; Aguila, B.; Ma, S. A bifunctional covalent organic framework as an efficient platform for cascade catalysis. *Mater. Chem. Front.* **2017**, *1*, 1310-1316.
- S32. Leng, W.; Peng, Y.; Zhang, J.; Lu, H.; Feng, X.; Ge, R.; Dong, B.; Wang, B.; Hu, X.; Gao, Y. Sophisticated Design of Covalent Organic Frameworks with Controllable Bimetallic Docking for a Cascade Reaction. *Chem. Eur. J.* **2016**, *22*, 9087 – 9091.
- S33. Bhadra, M.; Sasmal, H. S.; Basu, A.; Midya, S. P.; Kandambeth, S.; Pachfule, P.; Balaraman, E.; Banerjee, R. Predesigned Metal-Anchored Building Block for In Situ Generation of Pd Nanoparticles in Porous Covalent Organic Framework: Application in Heterogeneous Tandem Catalysis. *ACS Appl. Mater. Interfaces* **2017**, *9*, 13785–13792.
- S34. Lu, S.; Hu, Y.; Wan, S.; McCaffrey, R.; Jin, Y.; Gu, H.; Zhang, W. Synthesis of Ultrafine and Highly Dispersed Metal Nanoparticles Confined in a Thioether-Containing Covalent Organic Framework and Their Catalytic Applications. *J. Am. Chem. Soc.* **2017**, *139*, 47, 17082-17088.
- S35. Shi, X.; Yao, Y.; Xu, Y.; Liu, K.; G.; Chi, L.; Lu, G. Imparting Catalytic Activity to a Covalent Organic Framework Material by Nanoparticle Encapsulation. *ACS appl. Mater. Interfaces* **2017**, *9*, 7481-7488.
- S36. Pachfule, P.; Kandambeth, S.; Díaz, D. D.; Banerjee, R. Highly stable covalent organic framework–Au nanoparticles hybrids for enhanced activity for nitrophenol reduction. *Chem. Commun.* **2014**, *50*, 3169–3172.
- S37. Wan, X.; Wang, X.; Chen, G.; Guo, C.; Zhang, B. Covalent organic framework/nanofibrillated cellulose composite membrane loaded with Pd nanoparticles for dechlorination of dichlorobenzene. *Mater. Chem. Phys.* **2020**, *246*, 122574.
- S38. Tan, X.; Zeng, W.; Fan, Y.; Yan, J.; Zhao, G. Covalent organic frameworks bearing pillar[6]arene-reduced Au nanoparticles for the catalytic reduction of nitroaromatics. *Nanotechnology* **2020**, *31*, 135705.
- S39. Li, X.; Zhang, C.; Luo, M.; Yao, Q.; Lu, Z.-H. Ultrafine Rh nanoparticles confined by nitrogen-rich covalent organic frameworks for methanolysis of ammonia borane. *Inorg. Chem. Front.* **2020**, *7*, 1298-1306.
- S40. Tao, R.; Shen, X.; Hu, Y.; Kang, K.; Zheng, Y.; Luo, S.; Yang, S.; Li, W.; Lu, S.; Jin, Y.; Qiu, L.; Zhang, W. Phosphine-Based Covalent Organic Framework for the Controlled Synthesis of Broad-Scope Ultrafine Nanoparticles. *Small* **2020**, *16*, 1906005.
- S41. Gonçalves, L. P. L.; Christensen, D. B.; Meledina, M.; Salonen, L. M.; Petrovykh, D. Y.; Carbó-Argibay, E.; Sousa, J. P. S.; Soares, O. S. G. P.; Pereira, M. F. R.; Kegnaes, S.; Kolen'ko, Y. V. Selective formic acid dehydrogenation at low temperature over a RuO<sub>2</sub>/COF pre-catalyst synthesized on the gram scale. *Catal. Sci. Technol.* **2020**, *10*, 1991-1995.
- S42. Zhang, Q.-P.; Sun, Y.-I.; Cheng, G.; Wang, Z.; Ma, H.; Ding, S.-Y.; Tan, B.; Bu, J.-h.; Zhang, C. Highly dispersed gold nanoparticles anchoring on post-modified covalent organic framework for catalytic application. *Chem. Eng. J.* **2019**, *391* 123471.
- S43. Gong, W.; Wu, Q.; Jiang, G.; Li, G. Ultrafine silver nanoparticles supported on a covalent carbazole framework as high-efficiency nanocatalysts for nitrophenol reduction. *J. Mater. Chem. A* **2019**, *7*, 13449–13454.
- S44. Ding, Z.-D.; Wang, Y.-X.; Xi, S.-F.; Li, Y.; Li, Z.; Ren, X.; Gu, Z.-G. A Hexagonal Covalent Porphyrin Framework as an Efficient Support for Gold Nanoparticles toward Catalytic Reduction of 4-Nitrophenol. *Chem. Eur. J.* **2016**, *22*, 17029-17036.
- S45. Gonçalves, R. S. B.; de Oliveira, A. B. V.; Sindra, H. C.; Archanjo, B. S.; Mendoza, M. E.; Carneiro, L. S. A.; Buarque, C. D.; Esteves, P. M. Heterogeneous Catalysis by Covalent Organic Frameworks (COF): Pd(OAc)<sub>2</sub>@COF-300 in Cross-Coupling Reaction. *ChemCatChem* **2016**, *8*, 743–750.
- S46. Kaleeswaran, D.; Antony, R.; Sharma, A.; Malani, A.; Murugavel, R. Catalysis and CO<sub>2</sub> Capture by Palladium-Incorporated Covalent Organic Frameworks. *ChemPlusChem* **2017**, *82*, 1253–1265.
- S47. Zhu, W.; Wang, X.; Li, T.; Shen R.; Hao, S.-J.; Li, Y.; Wang, Q.; Li, Z.; Gu, Z.-G. Porphyrin-based porous polyimide polymer/Pd nanoparticle composites as efficient catalysts for Suzuki–Miyaura coupling reactions. *Polym. Chem.* **2018**, *9*, 1430 –1438.
- S48. Ding, S.-Y.; Gao, J.; Wang, Q.; Zhang, Y.; Song, W.-G.; Su, C.-Y.; Wang, W. Construction of Covalent Organic Framework for Catalysis: Pd/COF-LZU1 in Suzuki–Miyaura Coupling Reaction. *J. Am. Chem. Soc.* **2011**, *133*, 19816–19822.
- S49. Hou, Y.; Zhang, X.; Sun, J.; Lin, S.; Qi, D.; Hong, R.; Li, D.; Xiao, X.; Jiang, J. Good Suzuki-coupling reaction performance of Pd immobilized at the metal-free porphyrin-based covalent organic framework. *Microporous Mesoporous Mater.* **2015**, *214*, 108–114.
- S50. Wang, J.-C.; Liu, C.-X.; Kan, X.; Wu, X.-W.; Kan, J.-L.; Dong, Y.-B. Pd@COF-QA: a phase transfer composite catalyst for aqueous Suzuki–Miyaura coupling reaction. *Green Chem.* **2020**, *22*, 1150-1155.
- S51. Yang, J.; Wu, Y.; Wu, X.; Liu, W.; Wang, Y.; Wang, J. An N-heterocyclic carbene-functionalised covalent organic framework with atomically dispersed palladium for coupling reactions under mild conditions. *Green Chem.* **2019**, *21*, 5267-5273.

- S52. Sadhasivam, V.; Balasaravanan, R.; Chithiraikumar, C.; Siva, A. Incorporating Pd(OAc)<sub>2</sub> on Imine Functionalized Microporous Covalent Organic Frameworks: A Stable and Efficient Heterogeneous Catalyst for Suzuki-Miyaura Coupling in Aqueous Medium. *Chem. Select* **2017**, *2*, 1063–1070.
- S53. Pachfule, P.; Panda, M. K.; Kandambeth, S.; Shivaprasad, S. M.; Díaz, D. D.; Banerjee, R. Multifunctional and robust covalent organic framework–nanoparticle hybrids. *J. Mater. Chem. A* **2014**, *2*, 7944–7952.
- S54. Leng, W.; Ge, R.; Dong, B.; Wang, C.; Gao, Y. Bimetallic docked covalent organic frameworks with high catalytic performance towards tandem reactions. *RSC Adv.* **2016**, *6*, 37403–37406.
- S55. Han, J.; Sun, X.; Wang, X.; Wang, Q.; Hou, S.; Song, X.; Wei, Y.; Wang, R.; Ji, W. Covalent Organic Framework as a Heterogeneous Ligand for the Regioselective Oxidative Heck Reaction. *Org. Lett.* **2020**, *22*, 1480–1484.
- S56. Mullangi, D.; Nandi, S.; Shalini, S.; Sreedhala, S.; Vinod, C. P.; Vaidhyanathan, R. Pd loaded amphiphilic COF as catalyst for multi-fold Heck reactions, C-C couplings and CO oxidation. *Sci. rep.* **2015**, *5*, 10876.
- S57. Guana, P.; Qiu, J.; Zhao, Y.; Wang, H.; Lia, Z.; Shib, Y.; Wang, J. A novel crystalline azine-linked three-dimensional covalent organic framework for CO<sub>2</sub> capture and conversion. *Chem. Commun.* **2019**, *55*, 12459–12462.
- S58. Chakraborty, D.; Shekhar, P.; Singh, H. D.; Kushwaha, R.; Vinod, C. P.; Vaidhyanathan, R. Ag Nanoparticles Supported on a Resorcinol-Phenylenediamine-Based Covalent Organic Framework for Chemical Fixation of CO<sub>2</sub>. *Chem. Asian J.* **2019**, *14*, 4767–4773.
- S59. Lin, S.; Hou, Y.; Deng, X.; Wang, H.; Suna, S.; Zhang, X. A triazine-based covalent organic framework/palladium hybrid for one-pot silicon-based cross-coupling of silanes and aryl iodides. *RSC Adv.* **2015**, *5*, 41017–41024.
- S60. Chen, G.-J.; Li, X.-B.; Zhao, C.-C.; Ma, H.-C.; Kan, J.-L.; Xin, Y.-B.; Chen, C.-X.; Dong, Y.-B. Ru Nanoparticles-Loaded Covalent Organic Framework for Solvent-Free One-Pot Tandem Reactions in Air. *Inorg. Chem.* **2018**, *57*, 2678–2685.
- S61. Pan, S.; Yao, D.; Liang, A.; Wen, G.; Jiang, Z. New Ag-Doped COF Catalytic Amplification Aptamer Analytical Platform for Trace Small Molecules with the Resonance Rayleigh Scattering Technique. *ACS Appl. Mater. Interfaces* **2020**, *12*, 12120–12132.
- S62. Heintz, P. M.; Schumacher, B. P.; Chen, M.; Huang, W.; Stanley, L. M. A Pd(II)-Functionalized Covalent Organic Framework for Catalytic Conjugate Additions of Arylboronic Acids to  $\beta,\beta$ -Disubstituted Enones. *ChemCatChem* **2019**, *11*, 4286–4290.
- S63. Vardhan, H.; Pan, Y.; Yang, Z.; Verma, G.; Nafady, A.; Al-Enizi, A. M.; Alotaibi, T. M.; Almaghrabi, O. A.; Ma, S. Iridium complex immobilization on covalent organic framework for effective C–H borylation. *APL Mater.* **2019**, *7*, 101111.
- S64. Hausoul, P. J. C.; Eggenhuisen, T. M.; Nand, D.; Baldus, M.; Weckhuysen, B. M.; Gebbink, R. J. M. K.; Bruijninx, P. C. A. Development of a 4,4'-biphenyl/phosphine-based COF for the heterogeneous Pd-catalysed telomerisation of 1,3-butadiene. *Catal. Sci. Technol.* **2013**, *3*, 2571–2579.
